# Supplementary material
Source: PubMed Central journal article supplement (PMC2895553)
Supplement: NIHMS208710-supplement-1_si_001.pdf [file NIHMS208710-supplement-1_si_001.pdf]

**Multiple *N*-methylation of MT-II backbone amide bonds leads to melanocortin receptor subtype hMC1R selectivity; pharmacological and conformational studies.**

Lucas Doedens,<sup>1‡</sup> Florian Opperer,<sup>1‡</sup> Minying Cai,<sup>2‡</sup> Johannes G. Beck,<sup>1‡</sup> Matt Dedek,<sup>2</sup> Erin Palmer,<sup>2</sup> Victor J. Hruby,<sup>2\*</sup> and Horst Kessler<sup>1\*</sup>

- 1) Institute for Advanced Study and Center for Integrated Protein Science at the Technische Universität München, Lichtenbergstr. 4, 85747 Garching, Germany.
- 2) Department of Chemistry and Biochemistry, University of Arizona, Tucson, Arizona, 85721, U.S.A.

\* authors to whom correspondence should be addressed at Technische Universität München (HK) and University of Arizona (VJH)

‡ contributed equally to these studies

## Supporting information

**Table 1.** Sequences and Physicochemical Properties of the *N*-methylated MT-II Analogs

| No. | sequence                 | HPLC<br>[t <sub>R</sub> ] (min) <sup>a</sup> | HR-ESI-MS<br>[M+H] <sup>+</sup> |
|-----|--------------------------|----------------------------------------------|---------------------------------|
| 1   | Nle D H f R W K          | 13.88                                        | 1024.5440                       |
| 2   | Nle D H f R W K $\alpha$ | 14.39                                        | 1038.5593                       |
| 3   | Nle D H f R W K          | 13.29                                        | 1038.5592                       |
| 4   | Nle D H f R W K          | 12.64                                        | 1038.5592                       |
| 5   | Nle D H f R W K          | 12.45                                        | 1038.5593                       |
| 6   | Nle D H f R W K          | 14.15                                        | 1038.5592                       |
| 7   | Nle D H f R W K $\alpha$ | 14.44                                        | 1052.5751                       |
| 8   | Nle D H f R W K $\alpha$ | 12.76                                        | 1052.5750                       |
| 9   | Nle D H f R W K $\alpha$ | 13.02                                        | 1052.5750                       |
| 10  | Nle D H f R W K $\alpha$ | 14.19                                        | 1052.5749                       |
| 11  | Nle D H f R W K          | 12.06                                        | 1052.5750                       |
| 12  | Nle D H f R W K          | 12.24                                        | 1052.5749                       |
| 13  | Nle D H f R W K          | 13.79                                        | 1052.5749                       |
| 14  | Nle D H f R W K          | 12.54                                        | 1052.5749                       |
| 15  | Nle D H f R W K          | 12.26                                        | 1052.5749                       |
| 16  | Nle D H f R W K          | 13.51                                        | 1052.5749                       |
| 17  | Nle D H f R W K $\alpha$ | 12.03                                        | 1066.5904                       |
| 18  | Nle D H f R W K $\alpha$ | 13.38                                        | 1066.5905                       |
| 19  | Nle D H f R W K $\alpha$ | 14.22                                        | 1066.5905                       |
| 20  | Nle D H f R W K $\alpha$ | 12.61                                        | 1066.5906                       |
| 21  | Nle D H f R W K $\alpha$ | 12.74                                        | 1066.5908                       |
| 22  | Nle D H f R W K $\alpha$ | 12.97                                        | 1066.5905                       |
| 23  | Nle D H f R W K          | 12.78                                        | 1066.5903                       |
| 24  | Nle D H f R W K          | 12.20                                        | 1066.5905                       |
| 25  | Nle D H f R W K          | 13.77                                        | 1066.5906                       |
| 26  | Nle D H f R W K          | 12.49                                        | 1066.5905                       |
| 27  | Nle D H f R W K $\alpha$ | 13.11                                        | 1080.6061                       |
| 28  | Nle D H f R W K $\alpha$ | 11.89                                        | 1080.6062                       |
| 29  | Nle D H f R W K $\alpha$ | 13.92                                        | 1080.6060                       |
| 30  | Nle D H f R W K $\alpha$ | 12.90                                        | 1080.6060                       |
| 31  | Nle D H f R W K          | 12.47                                        | 1080.6059                       |
| 32  | Nle D H f R W K $\alpha$ | 12.98                                        | 1094.6210                       |
| 33  | Nle D H f R W K $\beta$  | 22.16 <sup>b</sup>                           | 1038.5593                       |

*N*-methylated amino acids are highlighted in grey.

<sup>a</sup> RP-HPLC on C18 column, MeCN 10 to 100% in 30 min.

<sup>b</sup> RP-HPLC on C18 column, MeCN 10 to 50% in 30 min.

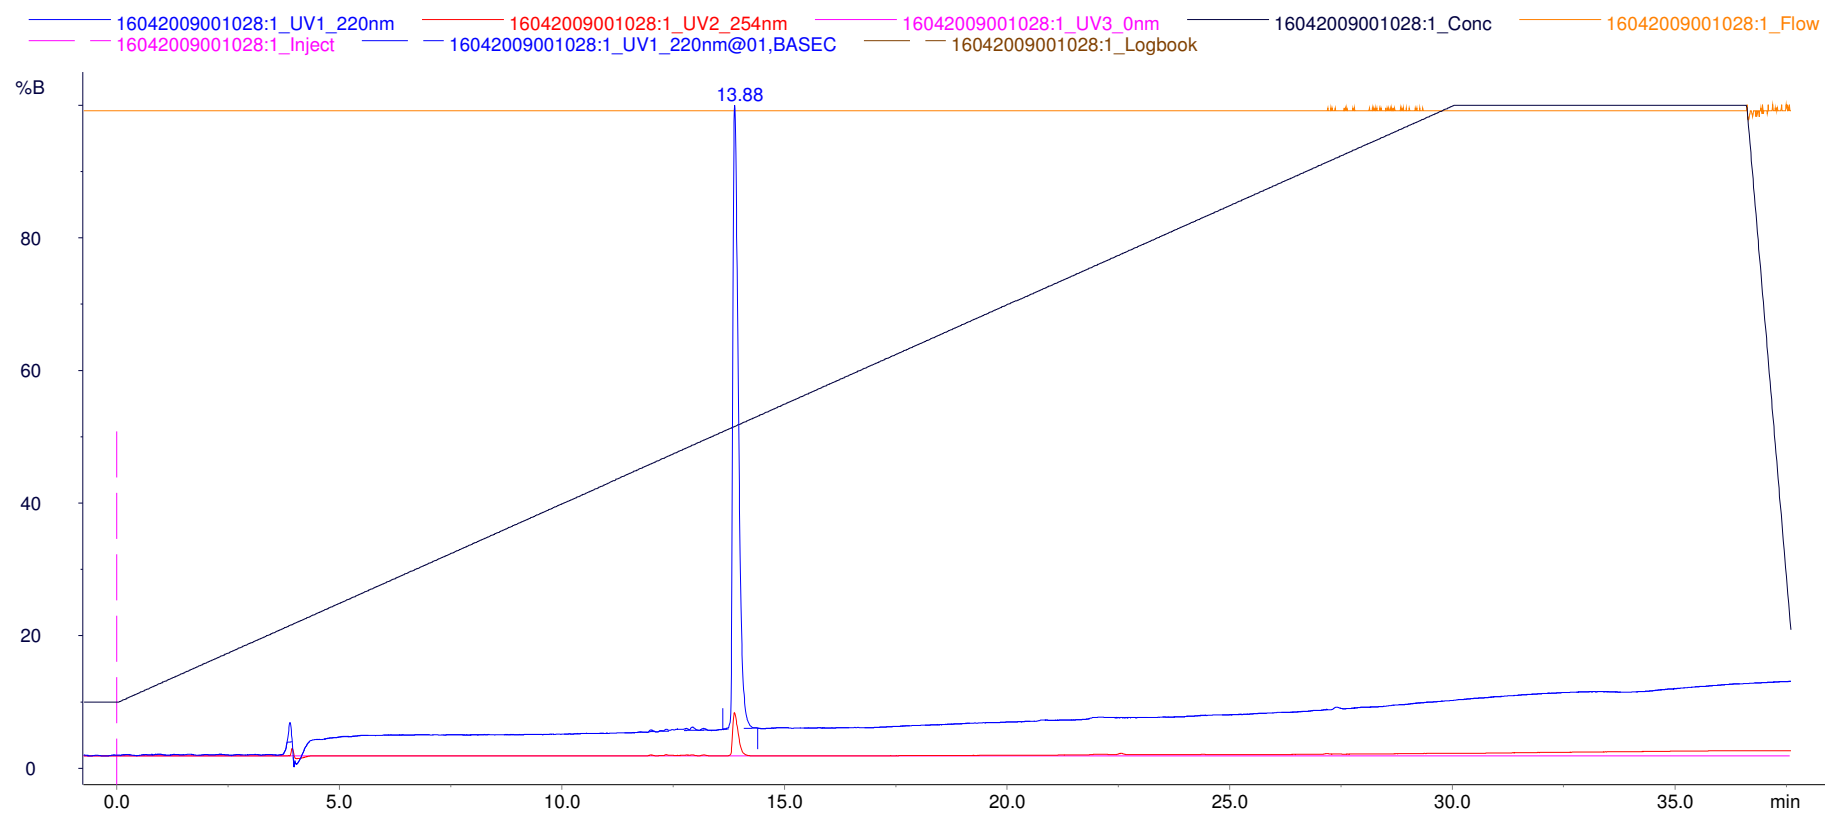

**Figure 1A:** HPLC chromatogram of compound 1 (MT-II).

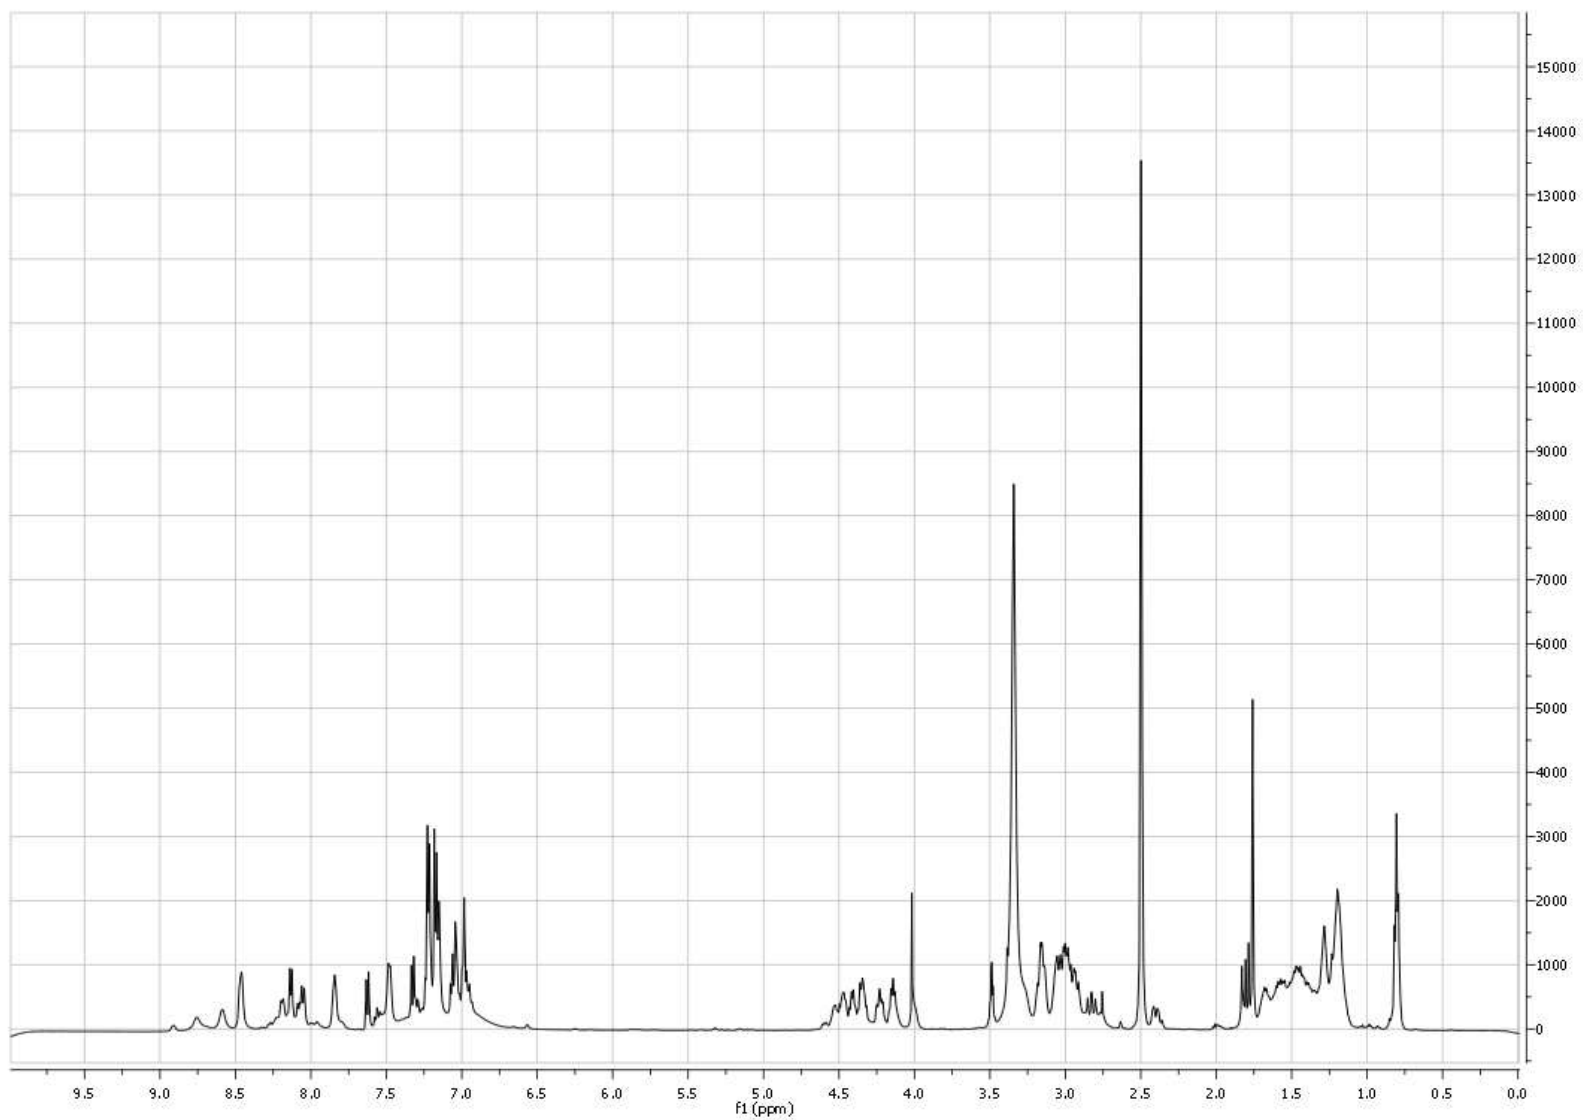

**Figure 1B:** <sup>1</sup>H-NMR spectrum of compound 1 (MT-II).

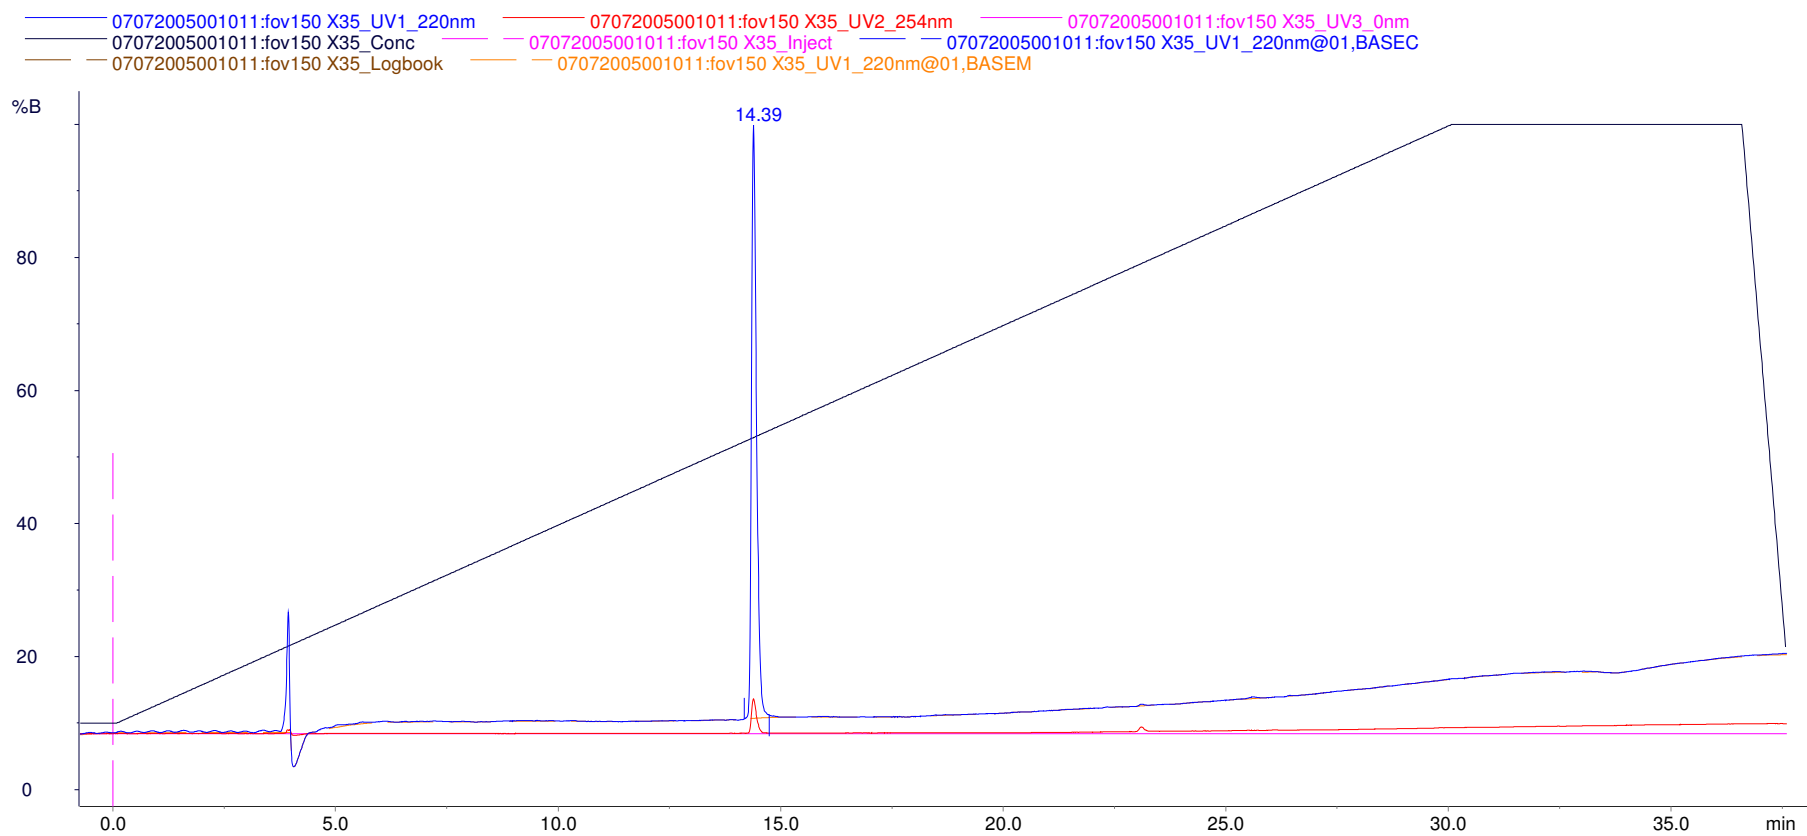

**Figure 2A:** HPLC chromatogram of compound 2.

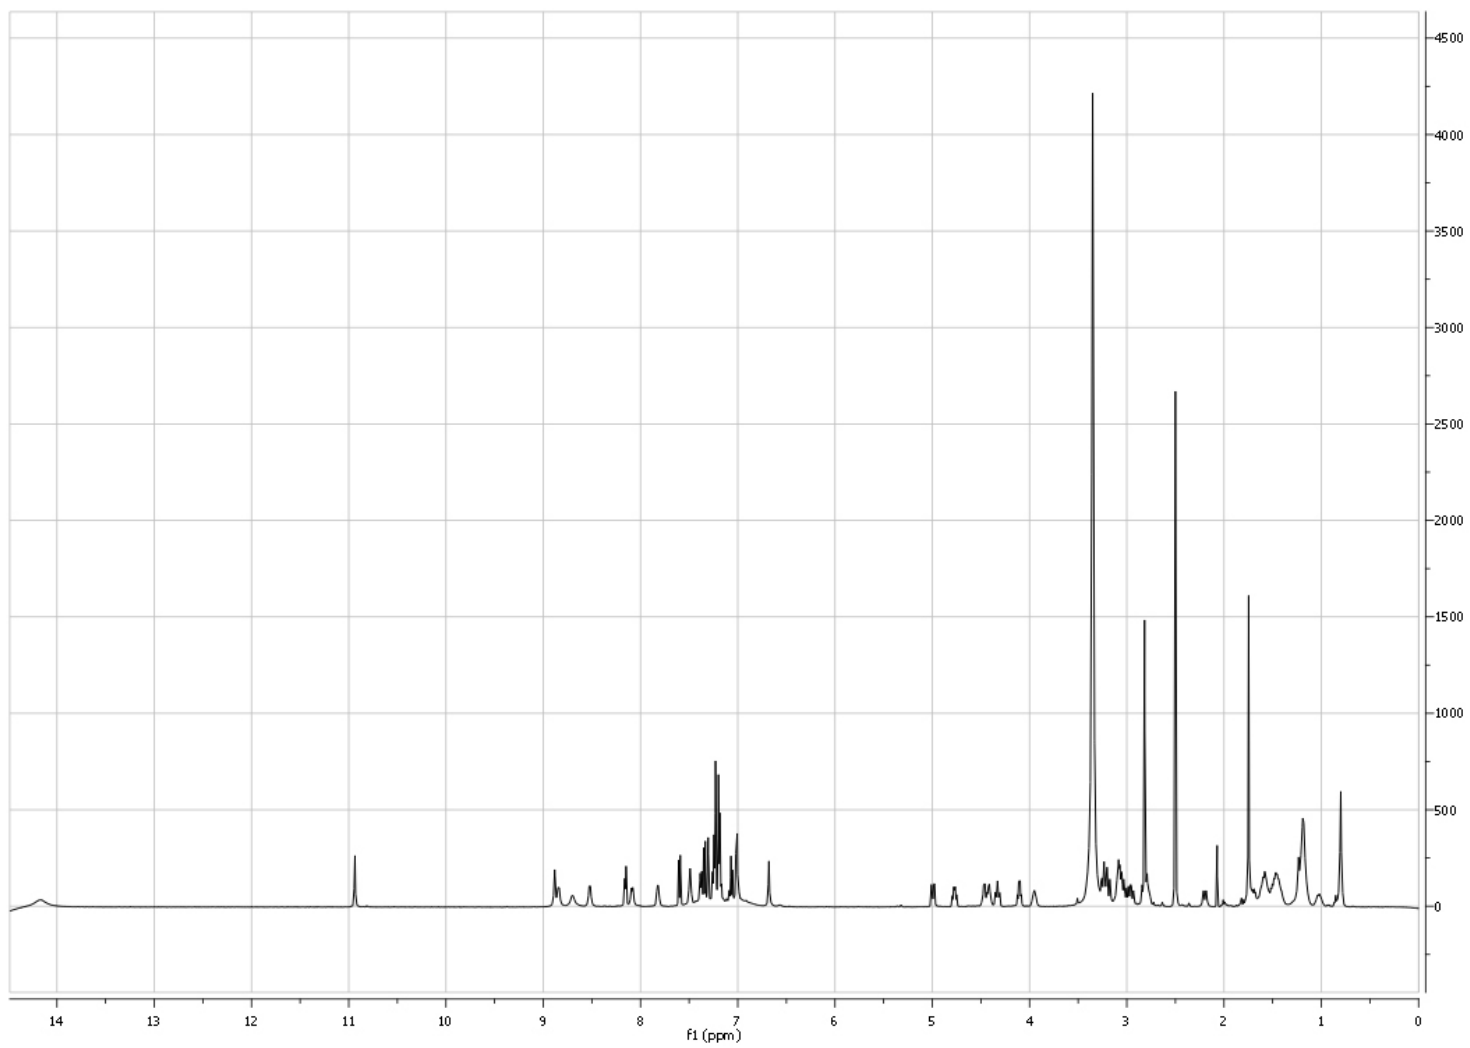

**Figure 2B:**  $^1\text{H-NMR}$  spectrum of compound 2.

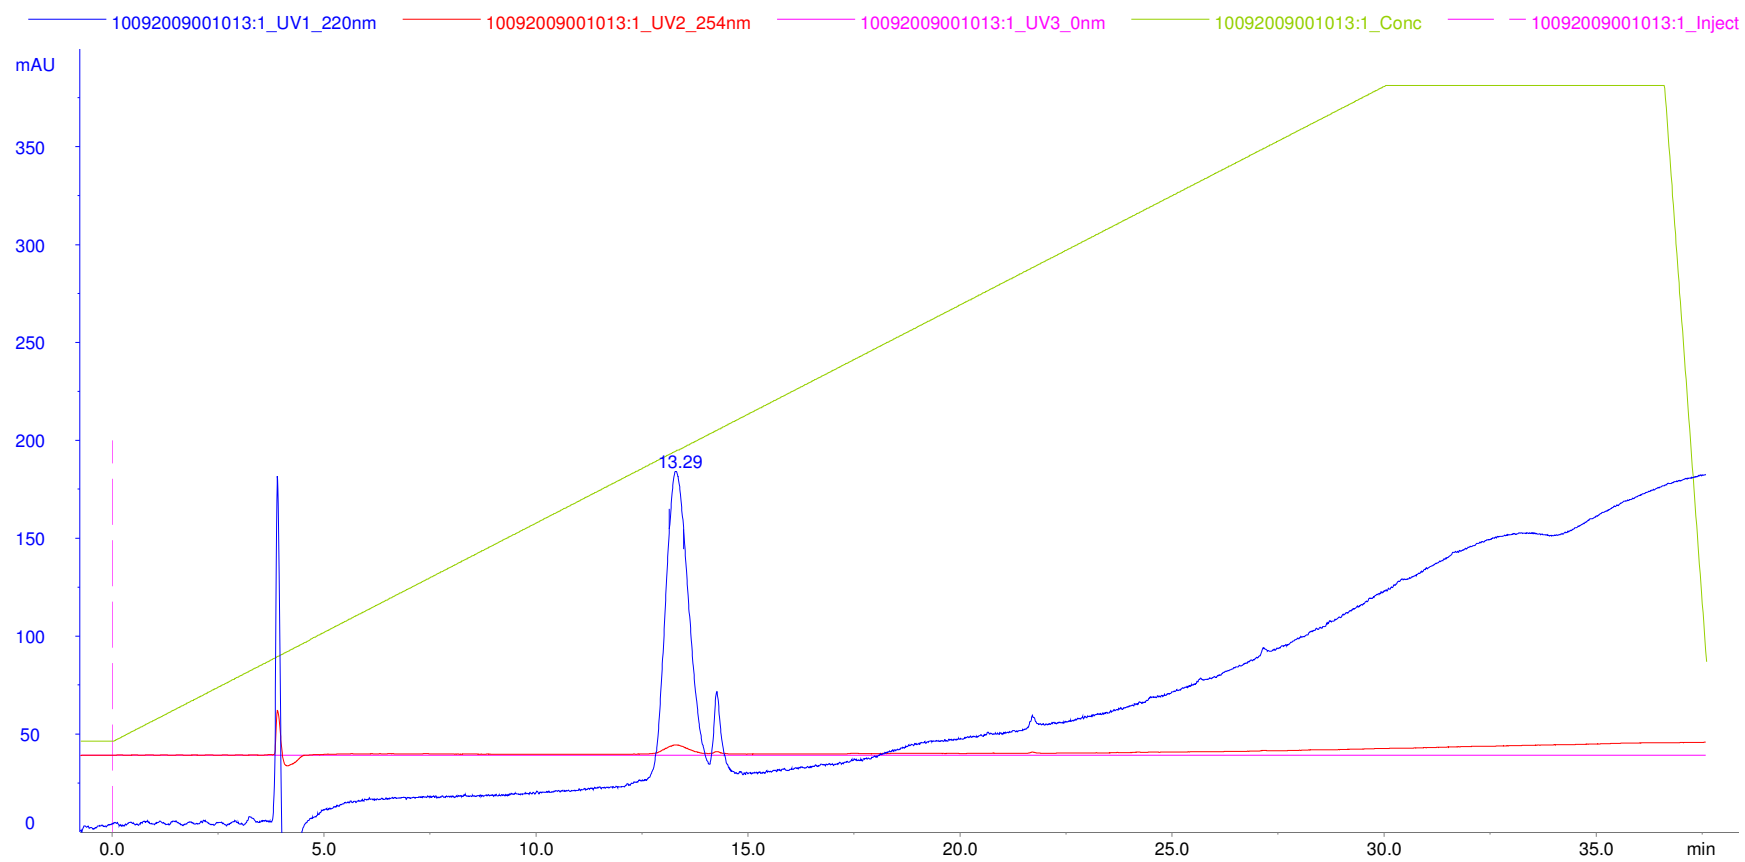

**Figure 3A:** HPLC chromatogram of compound 3.

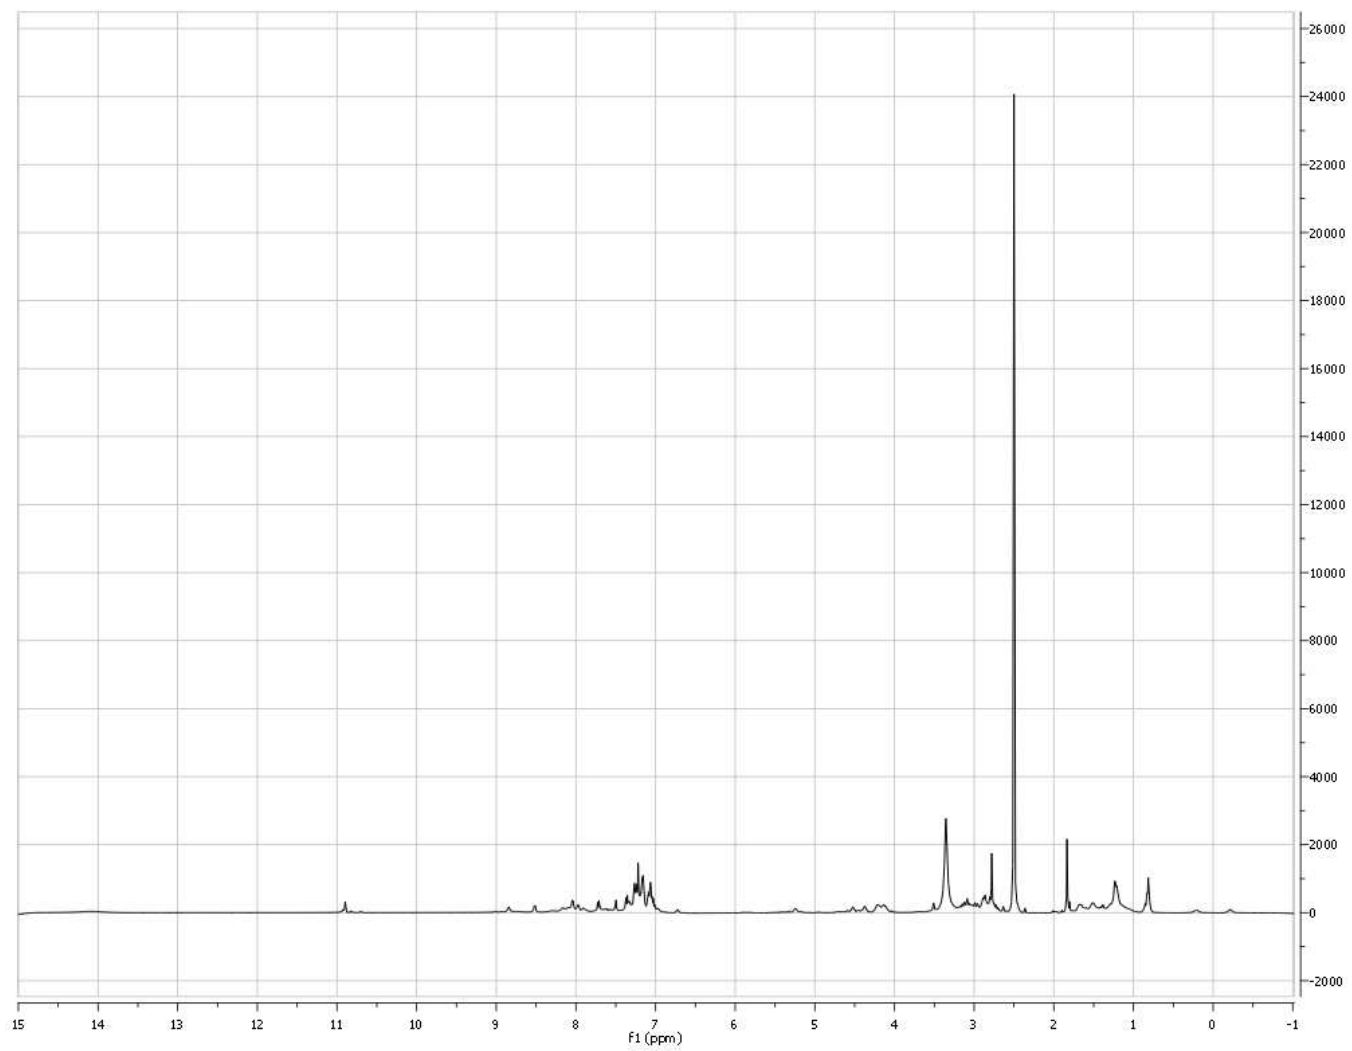

**Figure 3B:**  $^1\text{H-NMR}$  spectrum of compound 3.



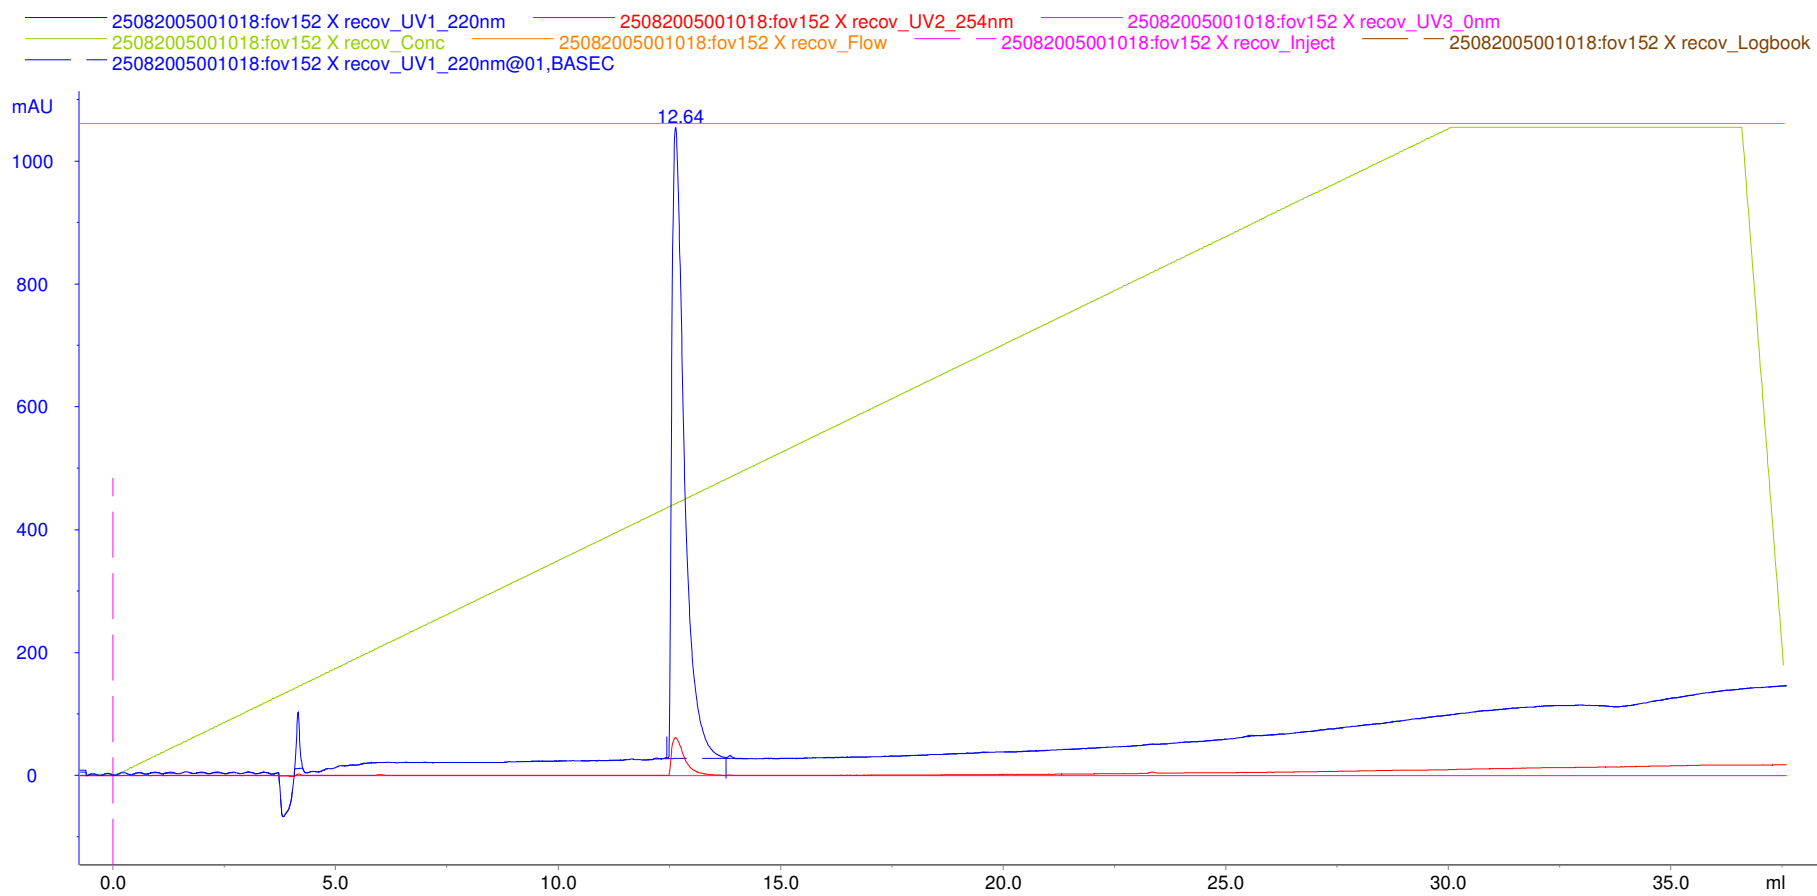

**Figure 4A:** HPLC chromatogram of compound 4.

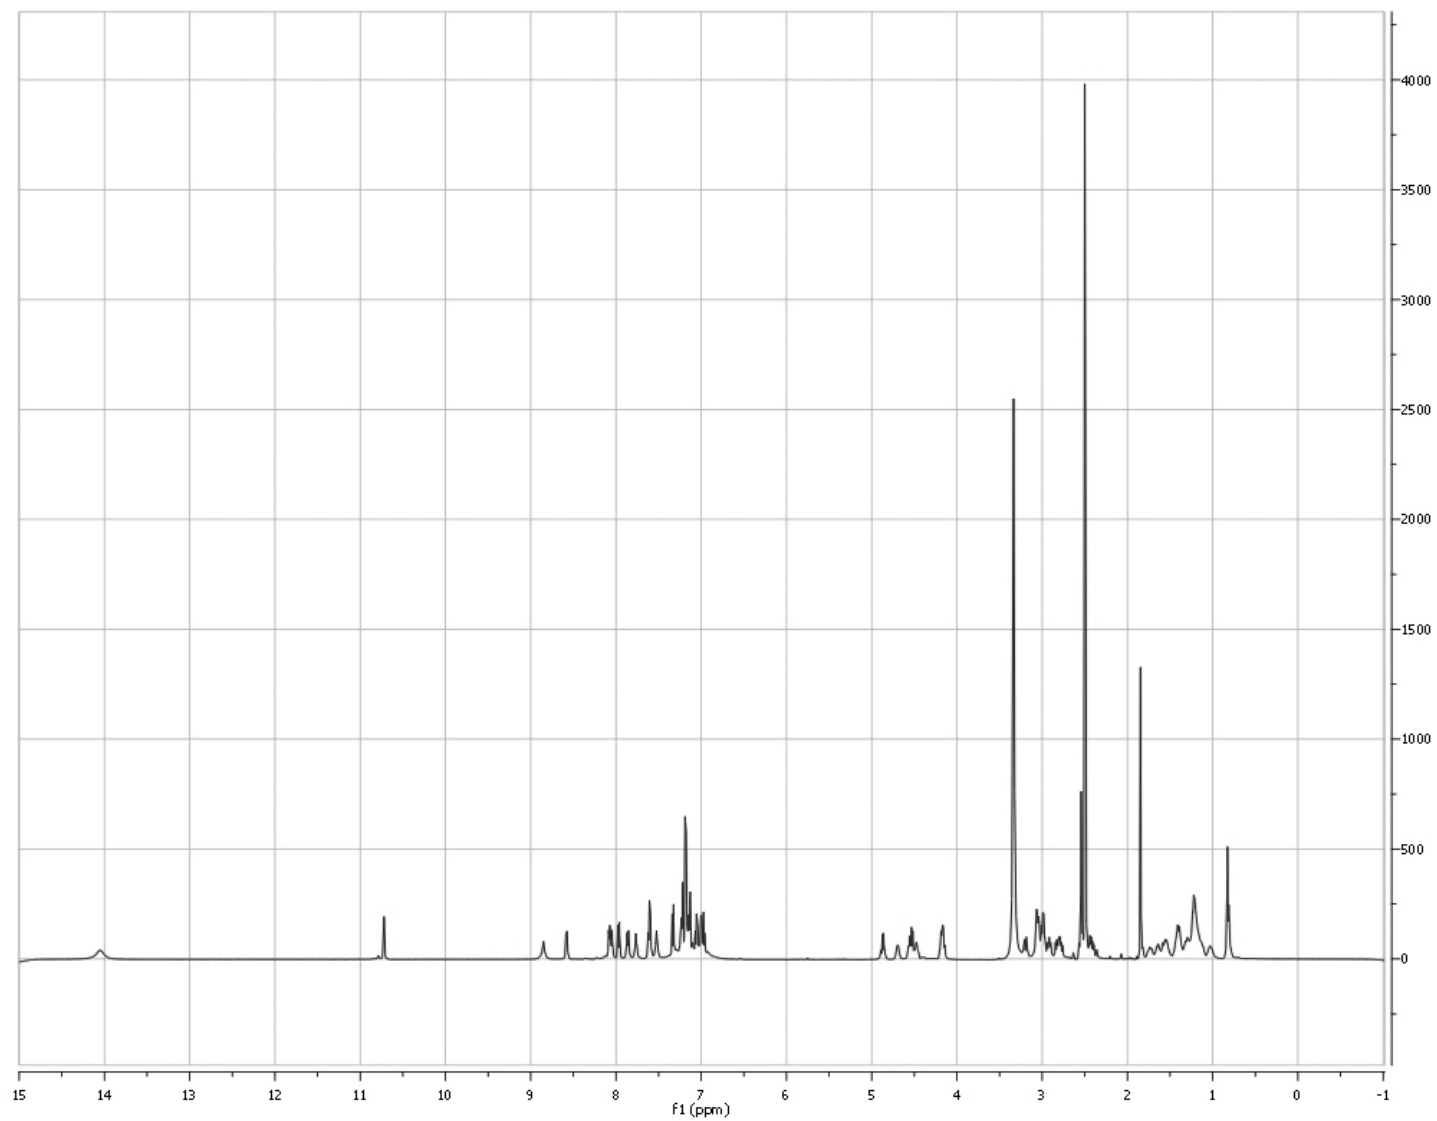

**Figure 4B:**  $^1\text{H-NMR}$  spectrum of compound 4.

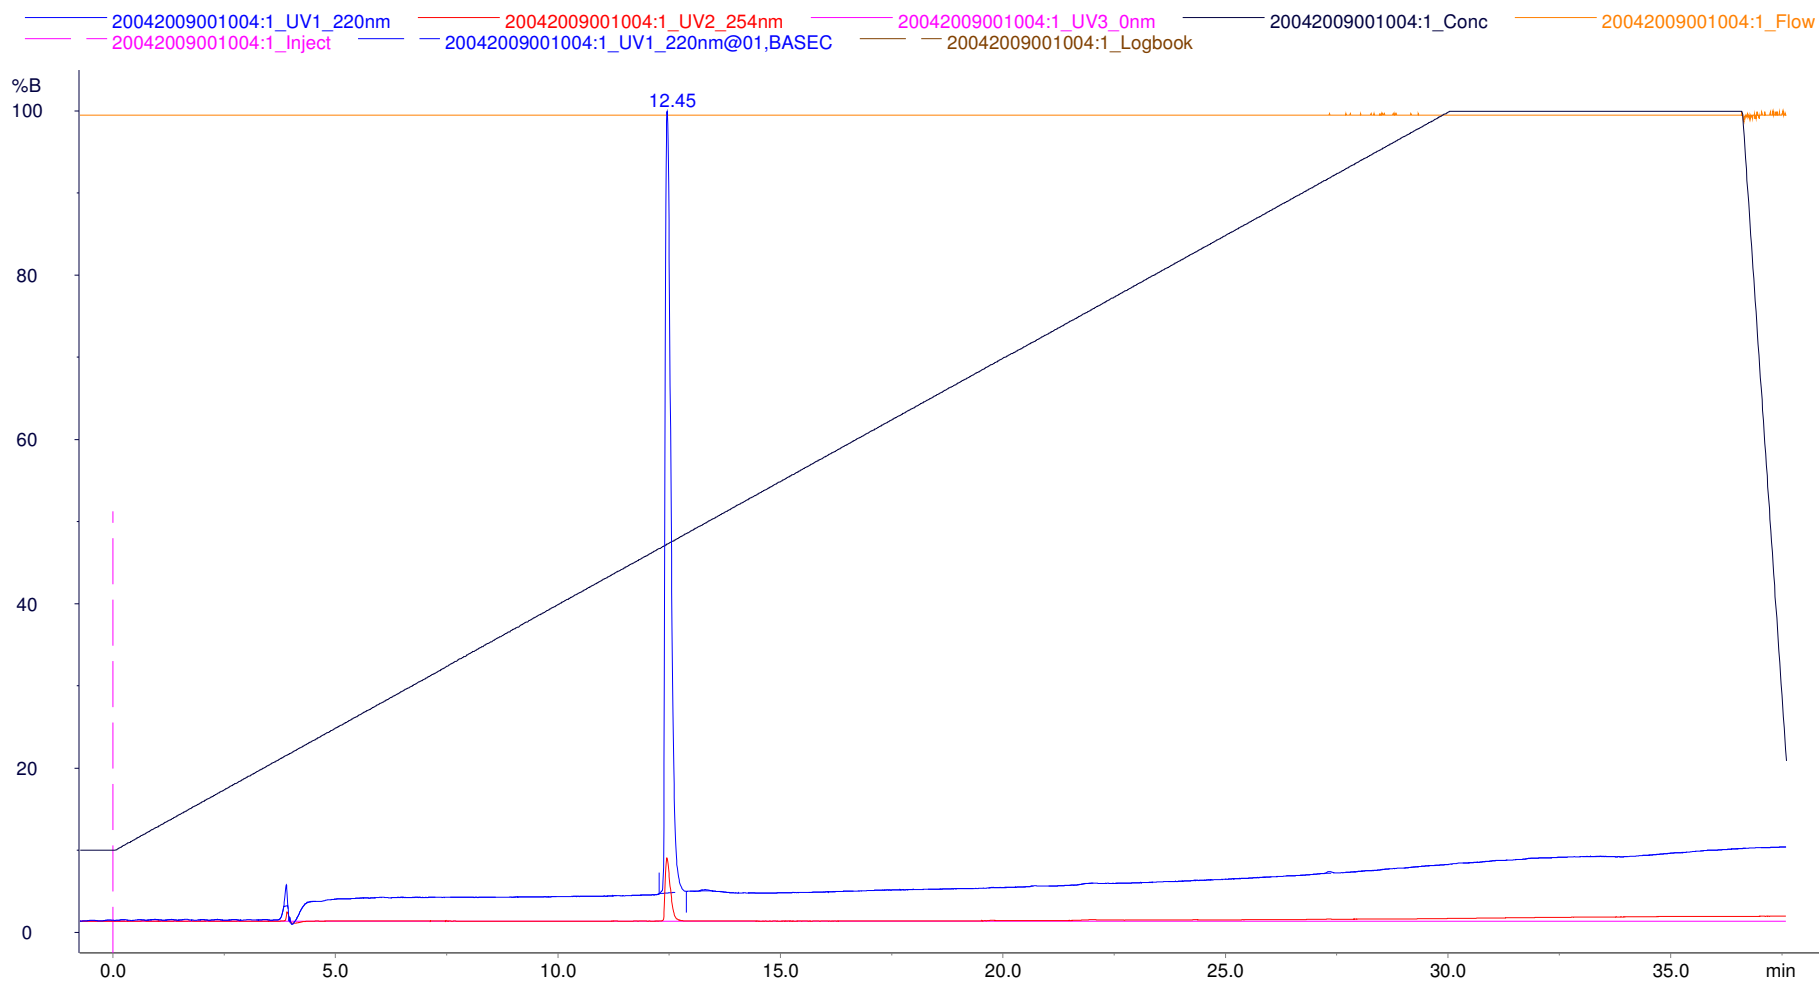

**Figure 5A:** HPLC chromatogram of compound 5.

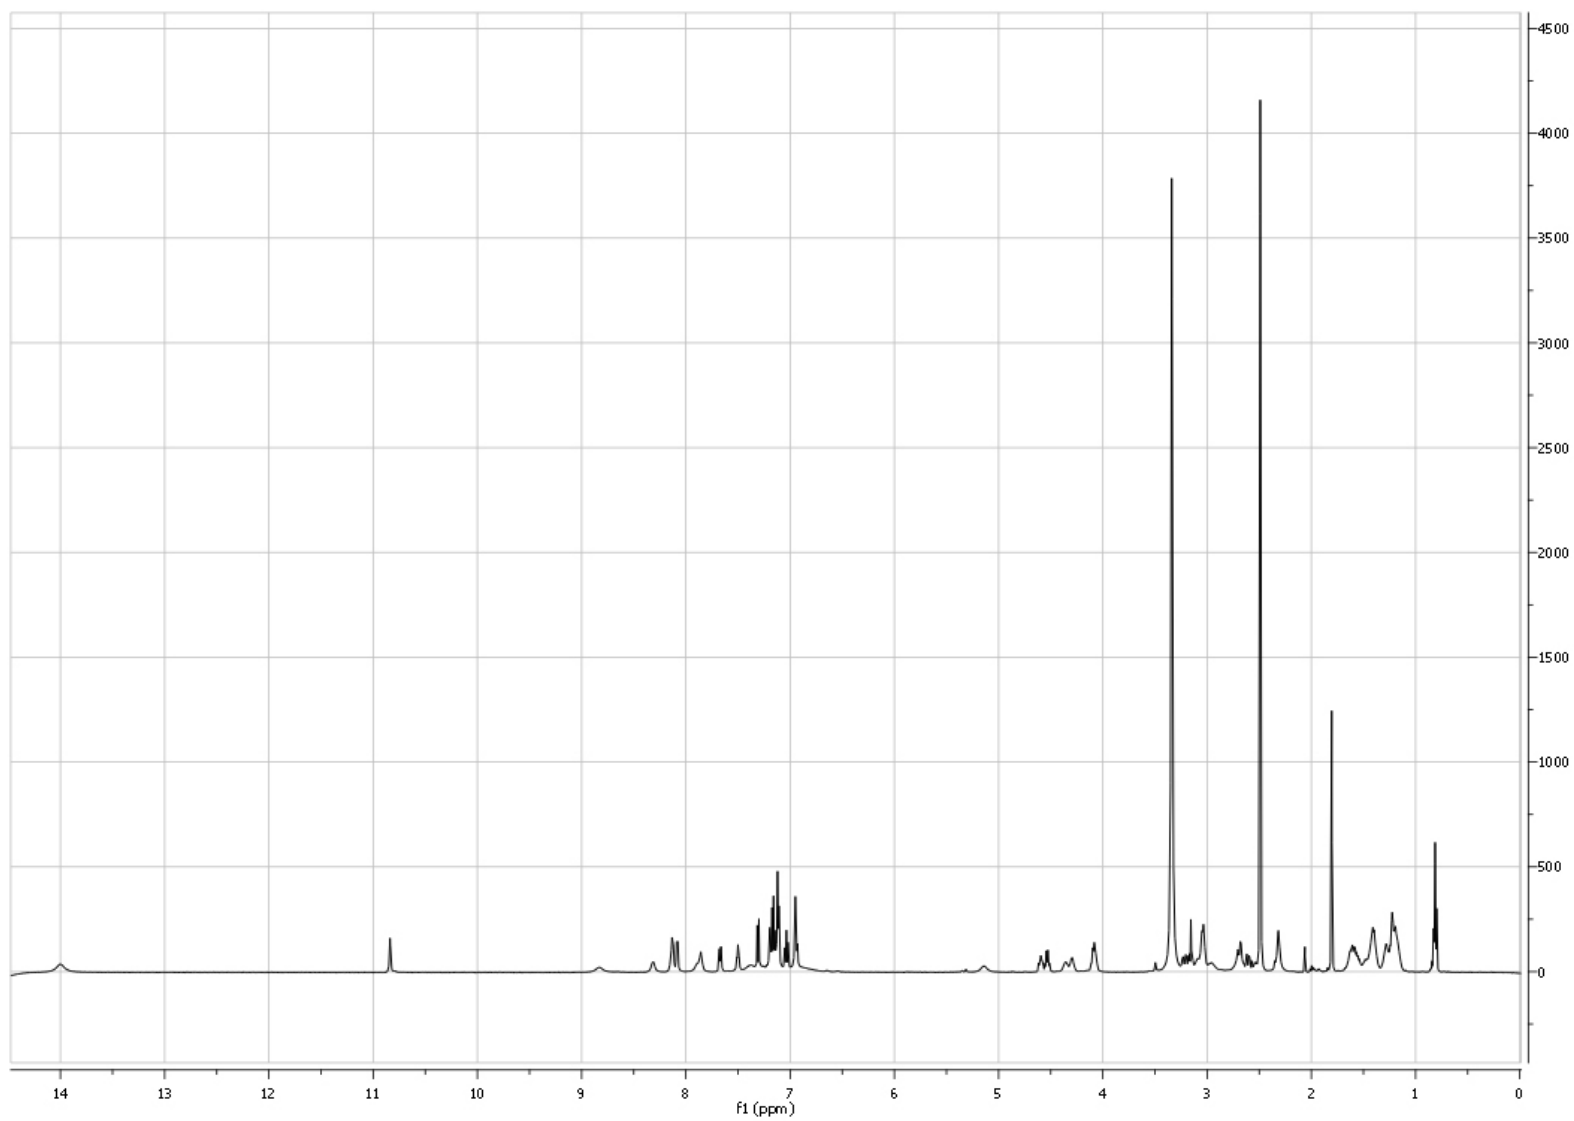

**Figure 5B:**  $^1\text{H-NMR}$  spectrum of compound 5.

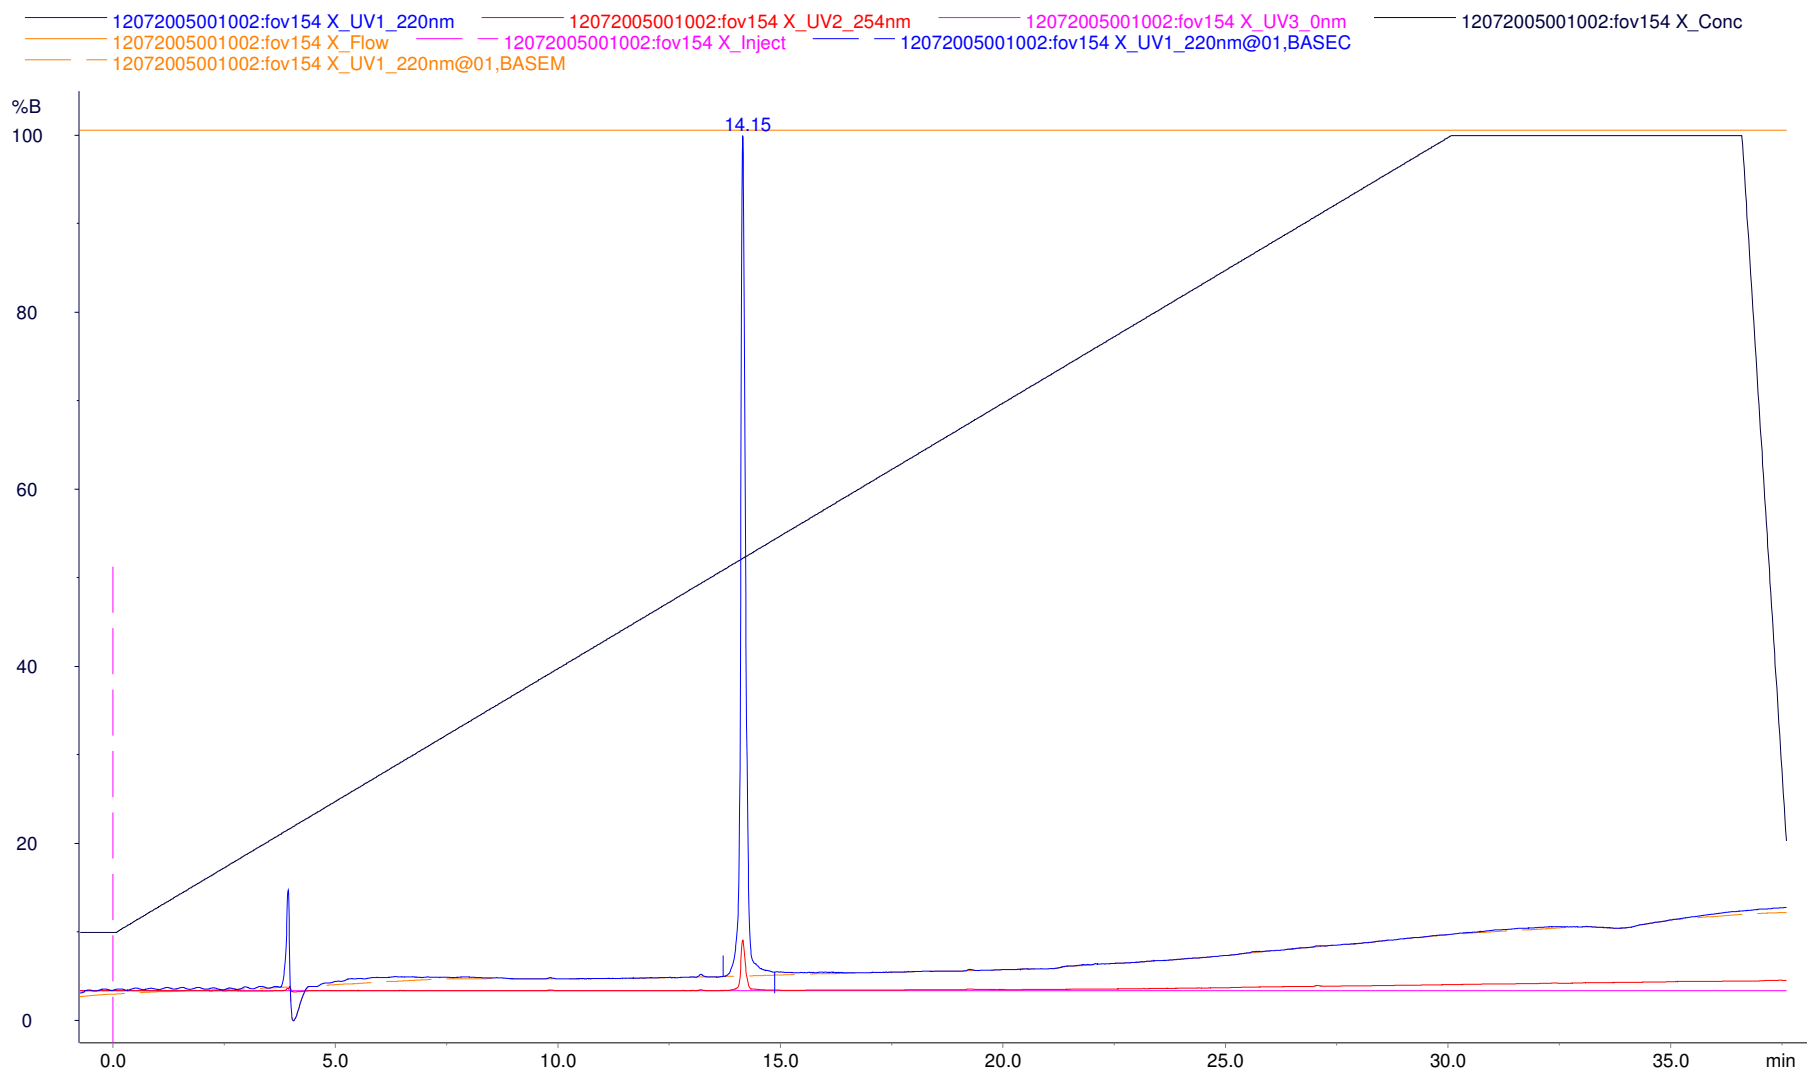

**Figure 6A:** HPLC chromatogram of compound 6.

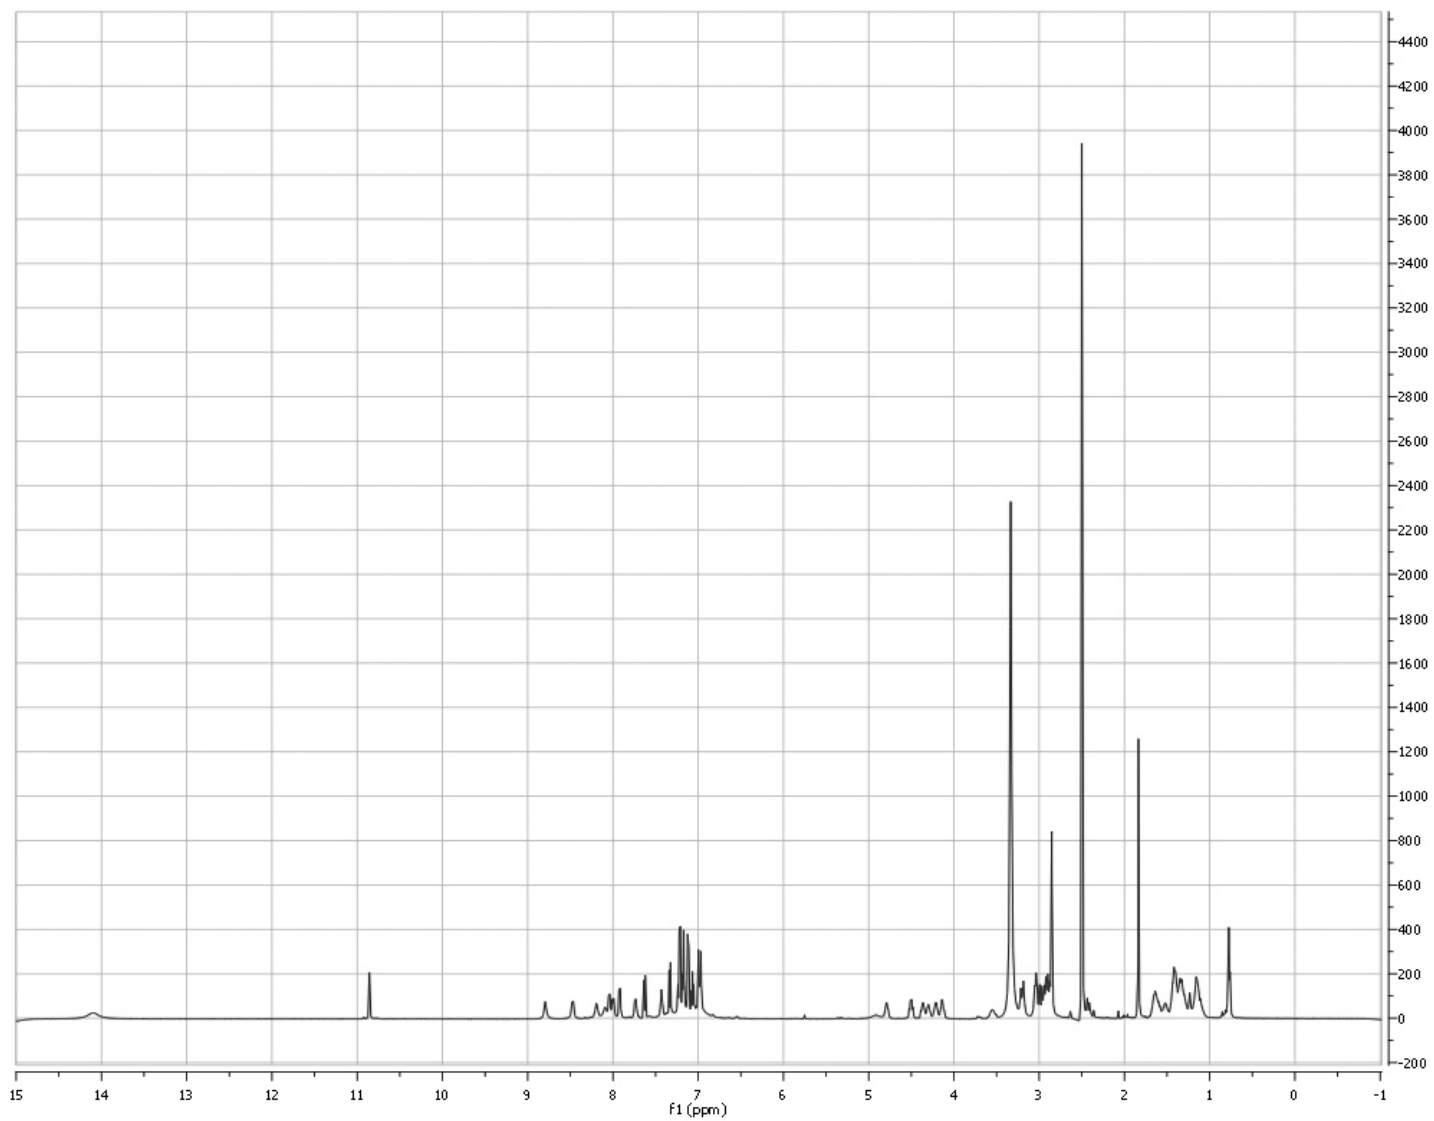

**Figure 6B:** <sup>1</sup>H-NMR spectrum of compound 6.

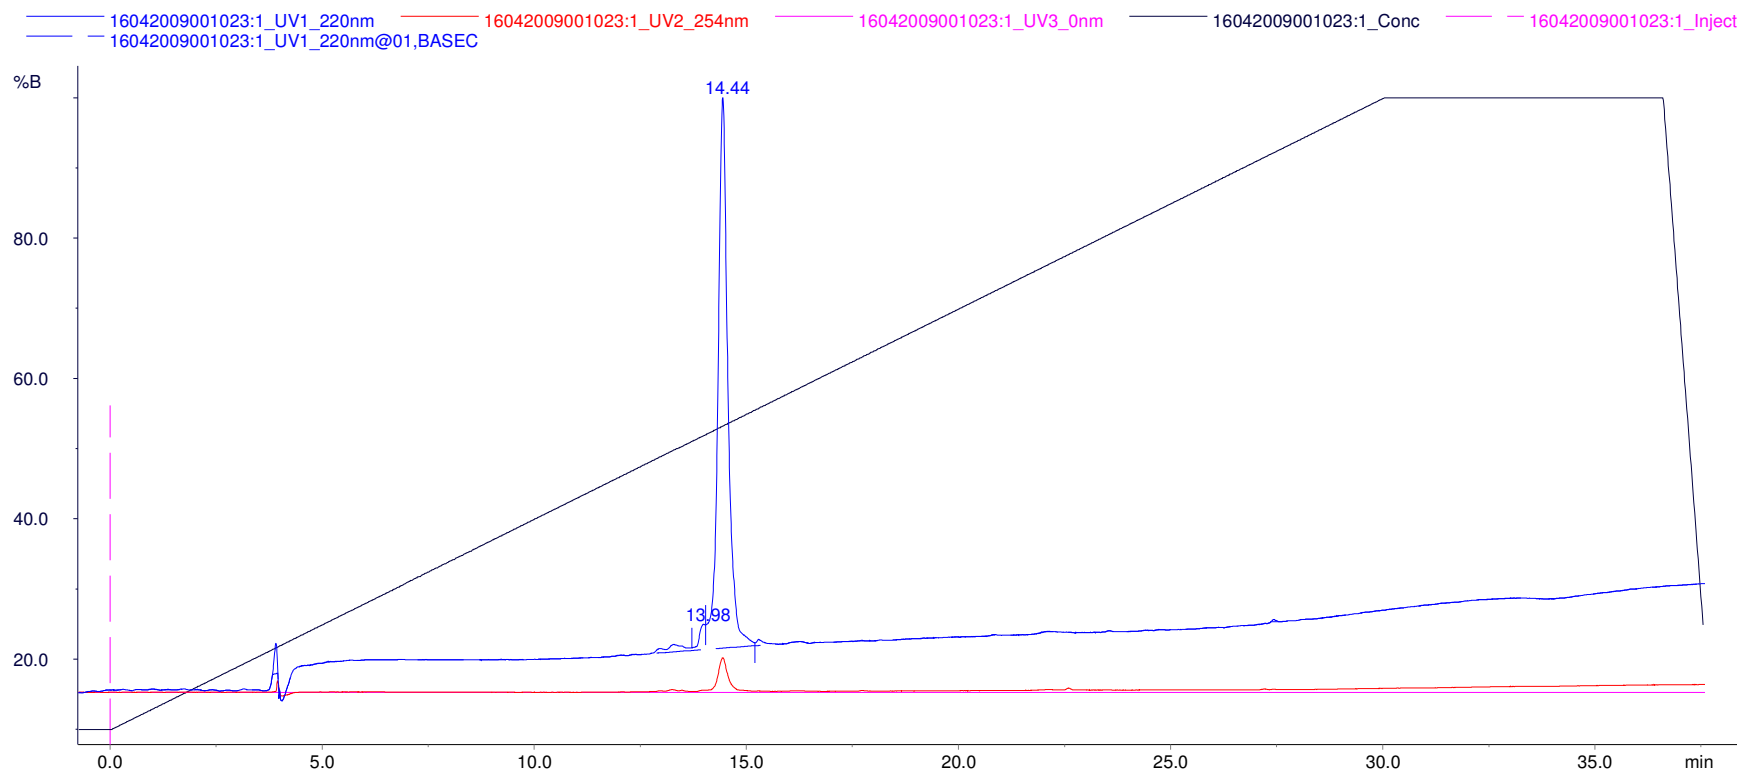

**Figure 7A:** HPLC chromatogram of compound 7.

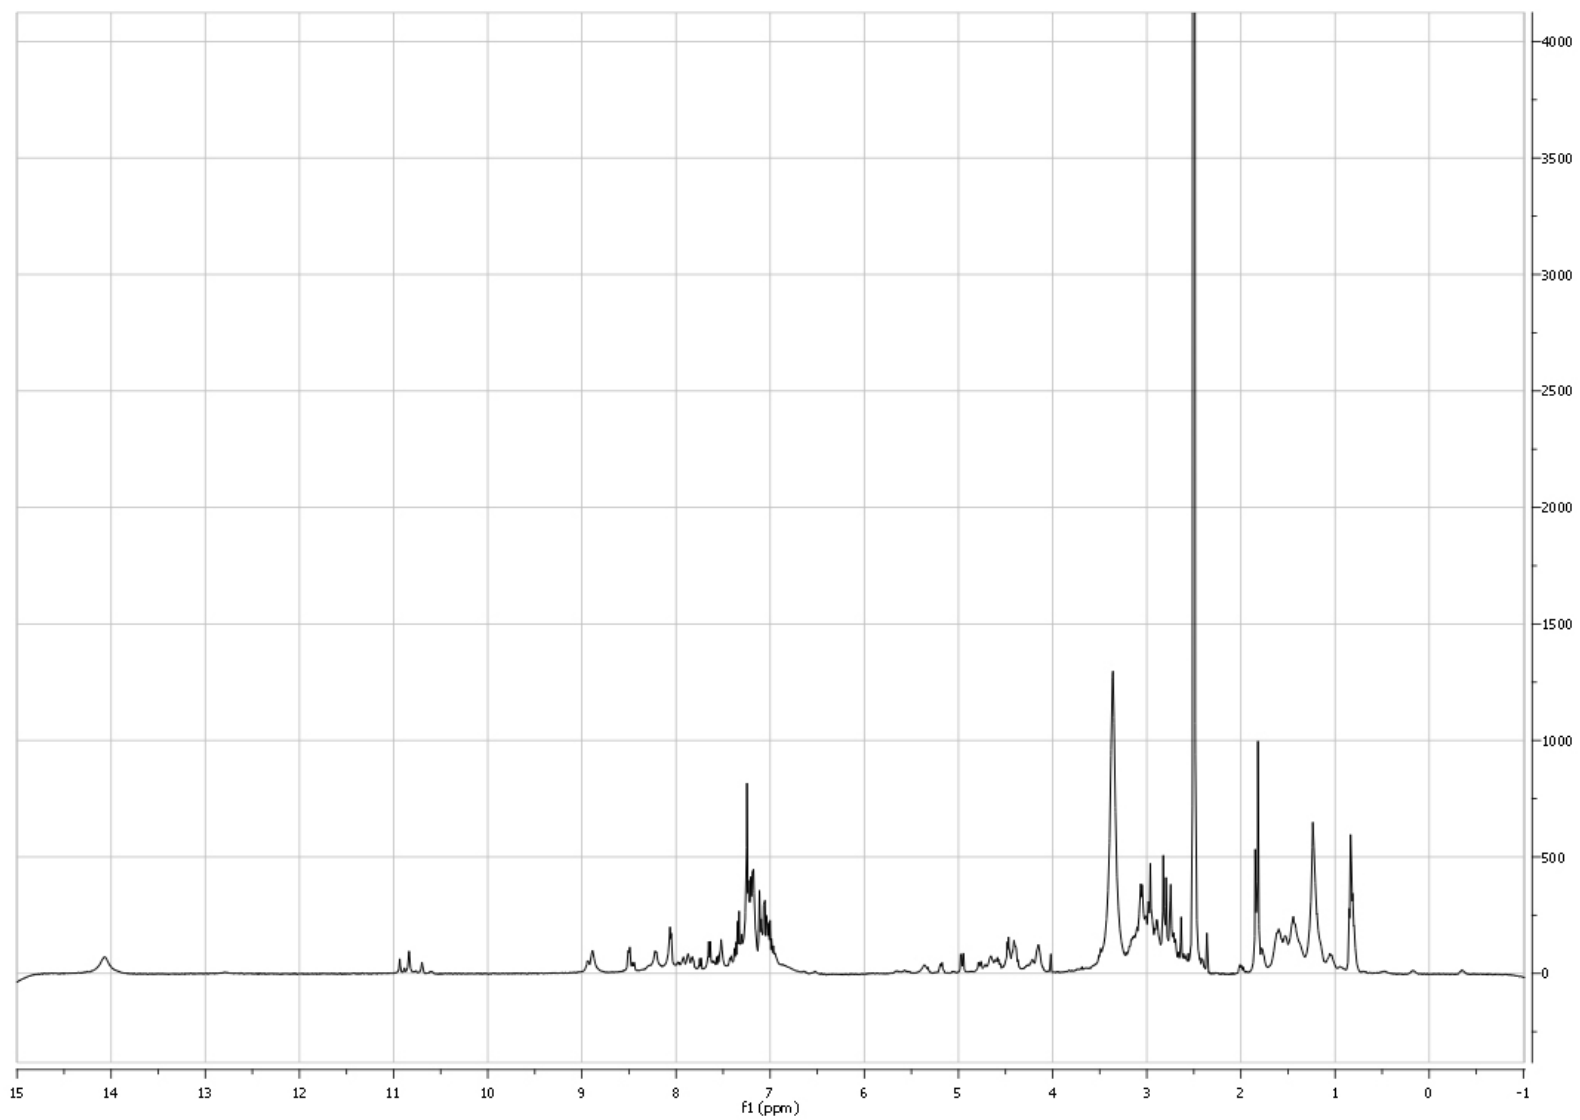

**Figure 7B:** <sup>1</sup>H-NMR spectrum of compound 7.



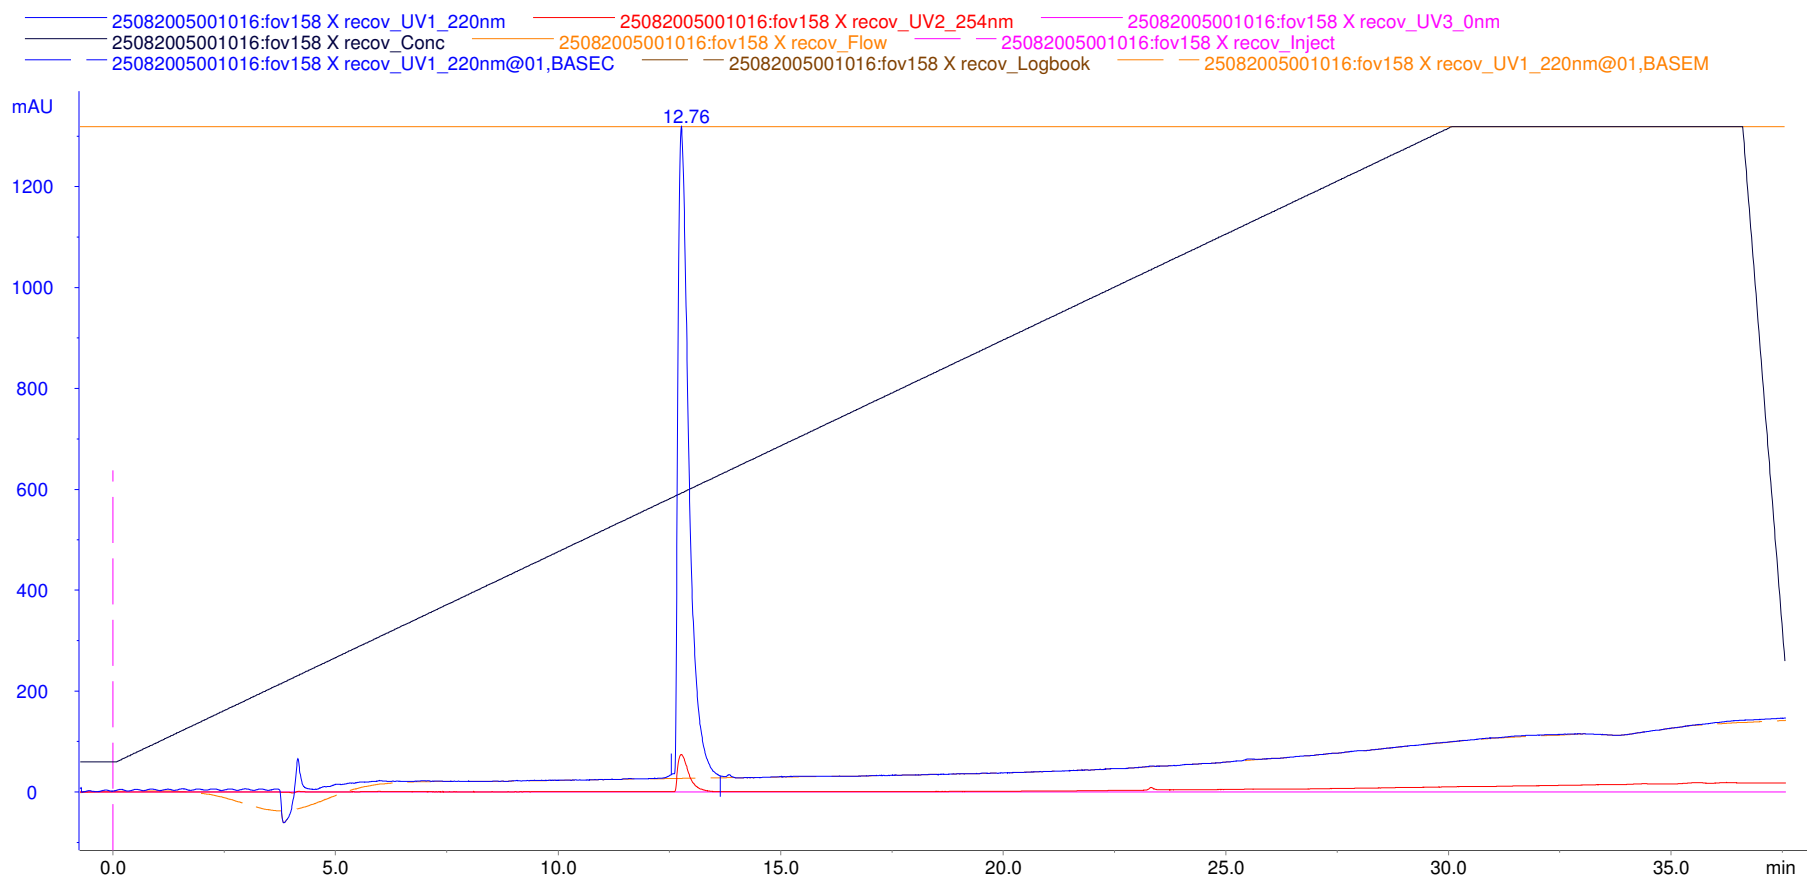

**Figure 8A:** HPLC chromatogram of compound 8.

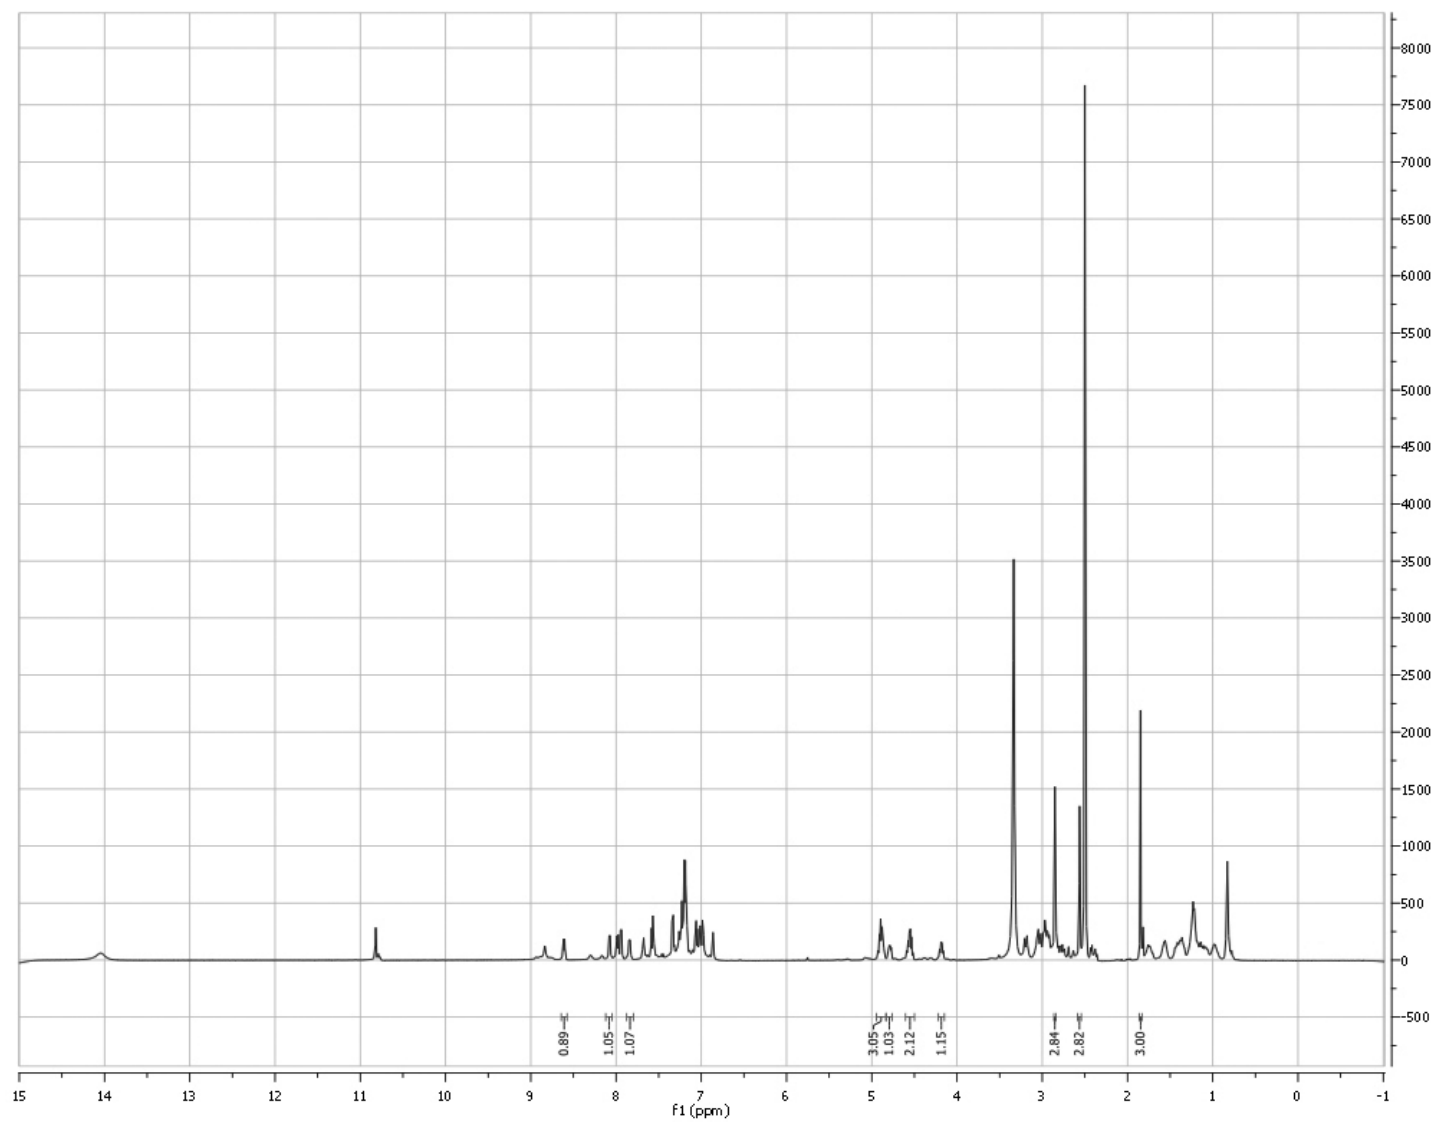

**Figure 8B:** <sup>1</sup>H-NMR spectrum of compound 8.

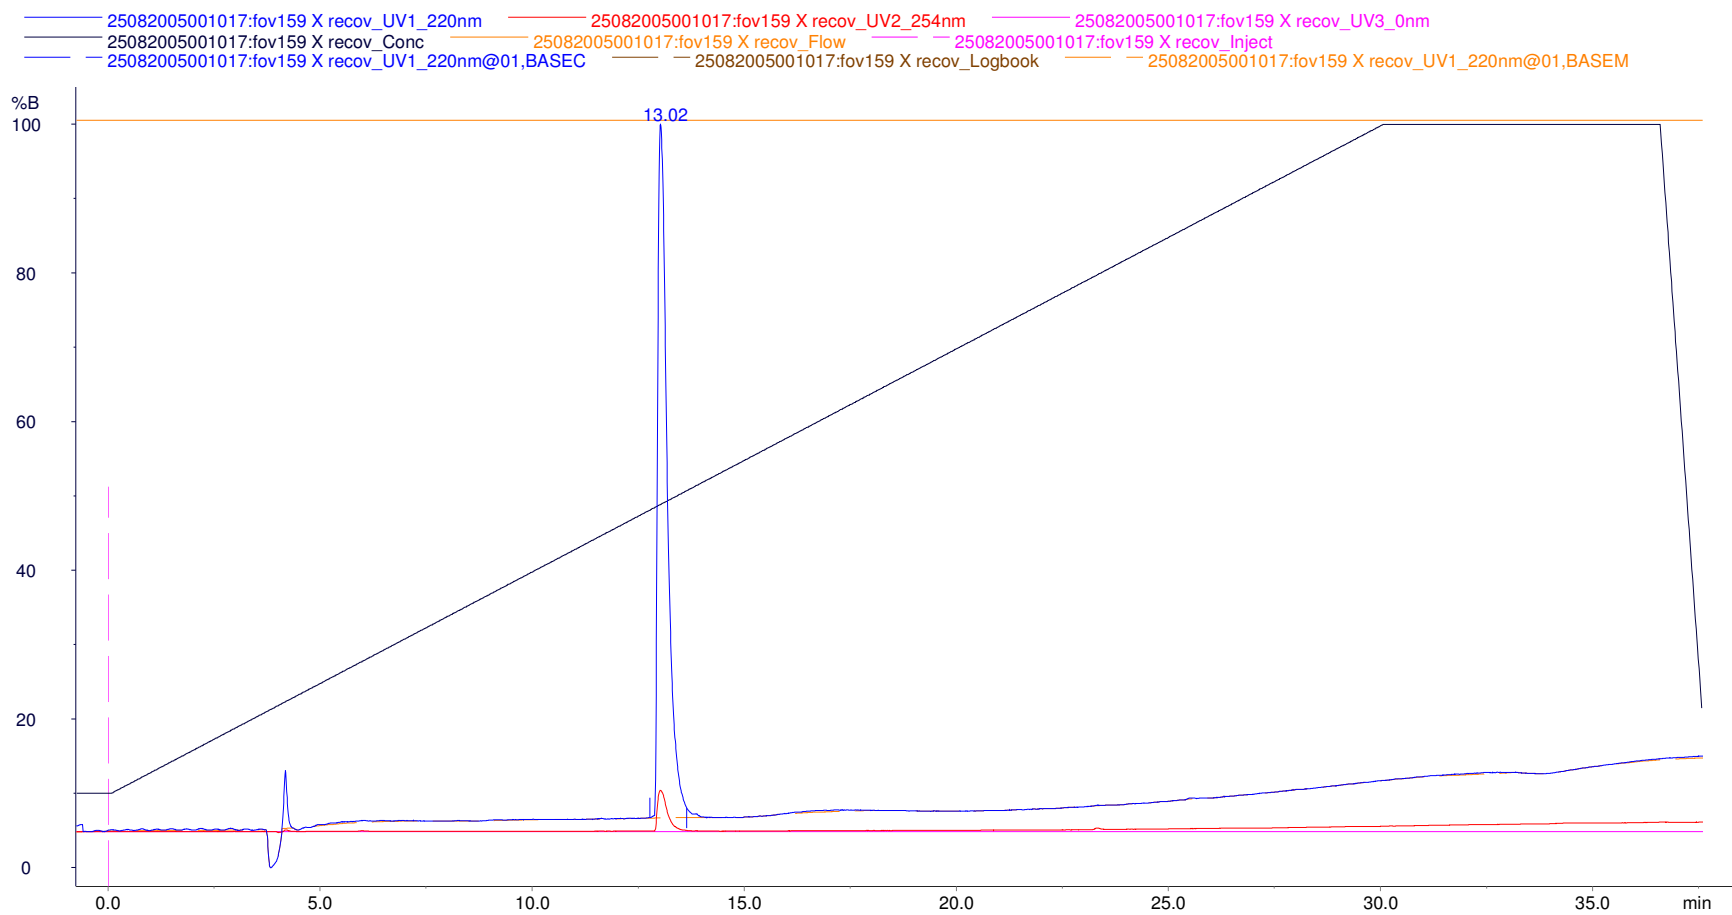

**Figure 9A:** HPLC chromatogram of compound 9.

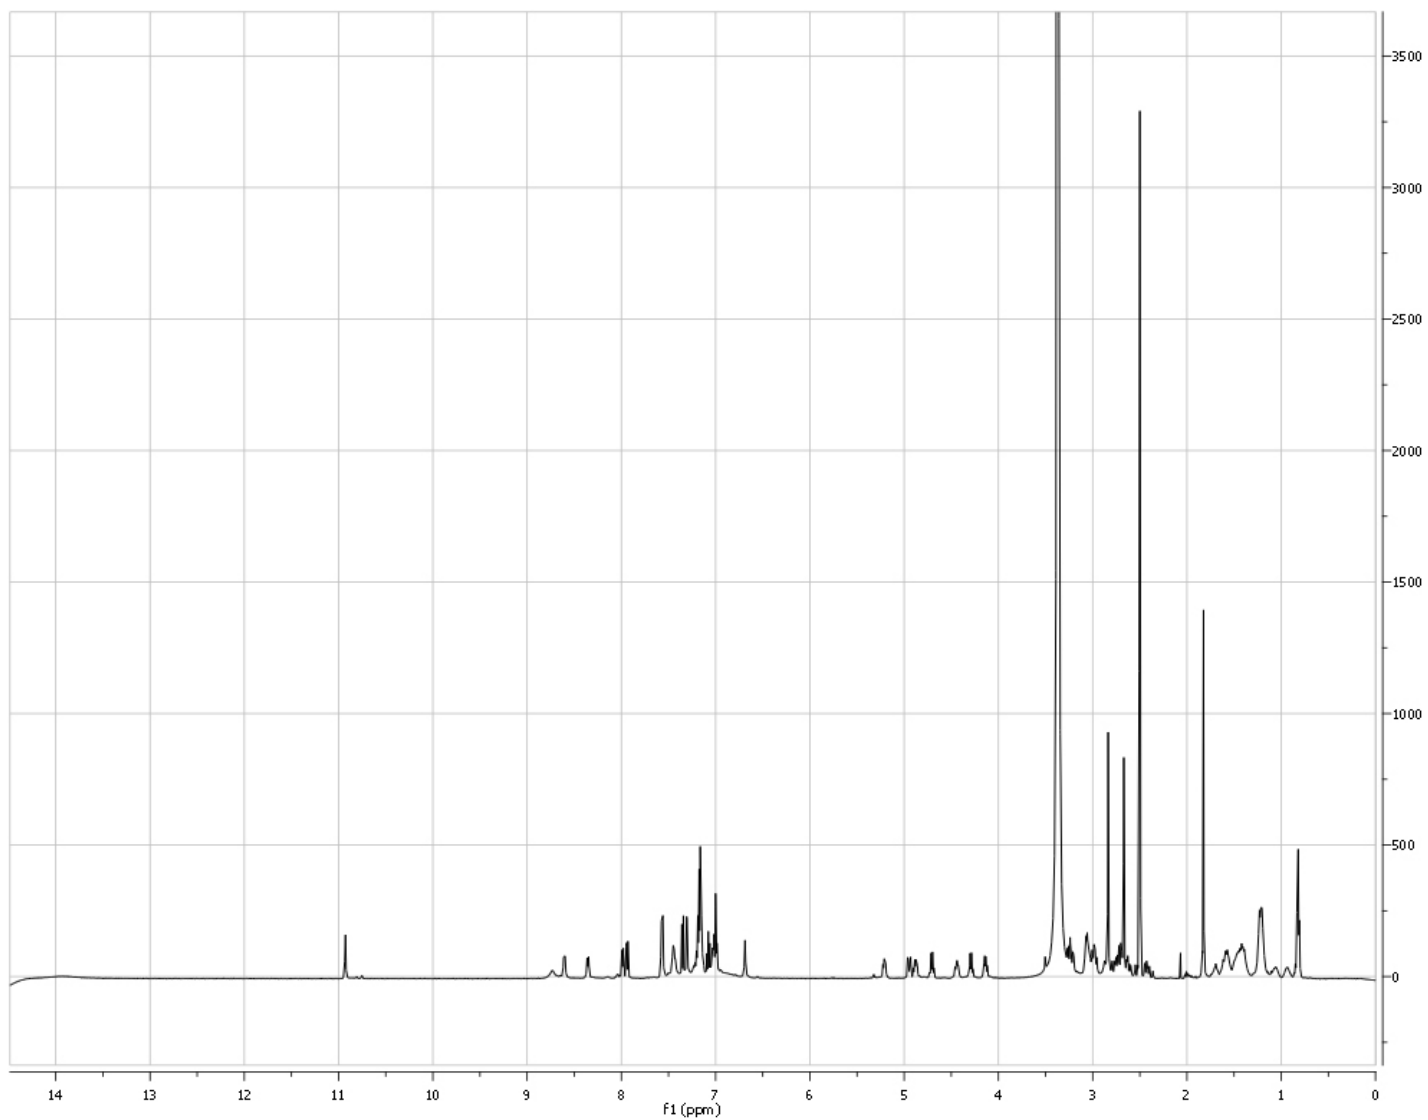

**Figure 9B:**  $^1\text{H-NMR}$  spectrum of compound 9.

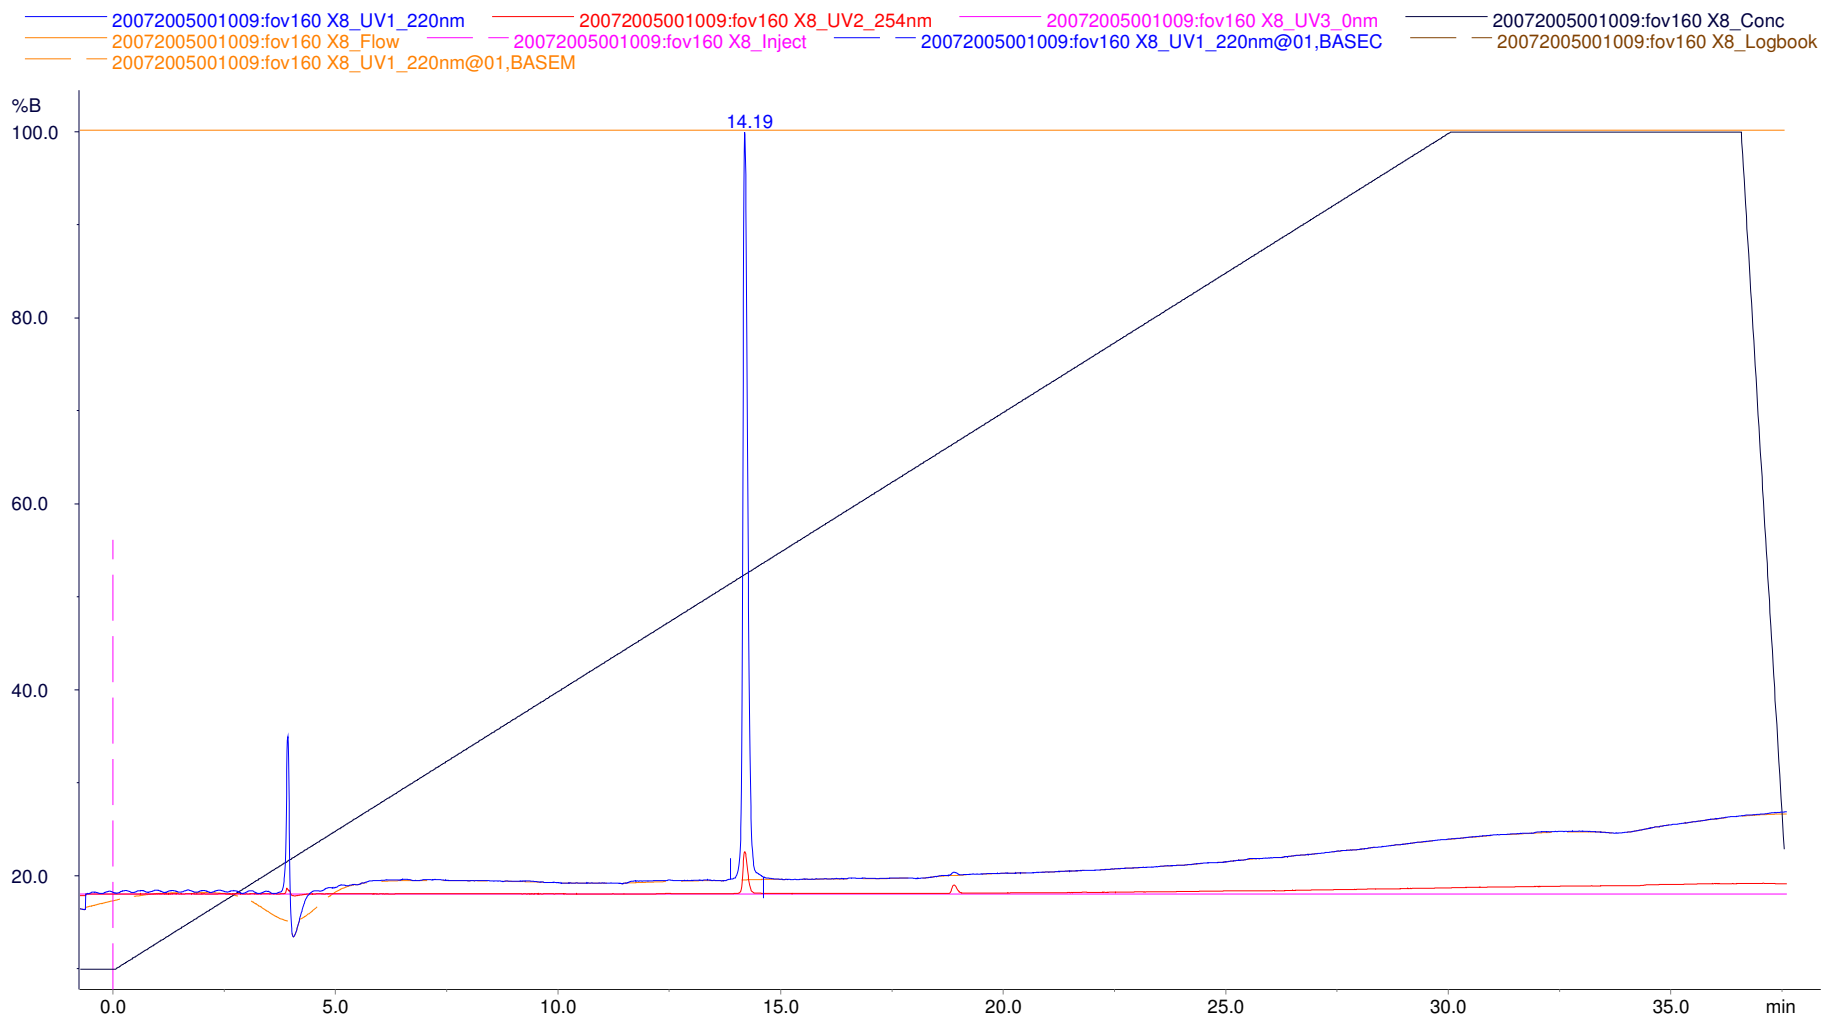

**Figure 10A:** HPLC chromatogram of compound 10.

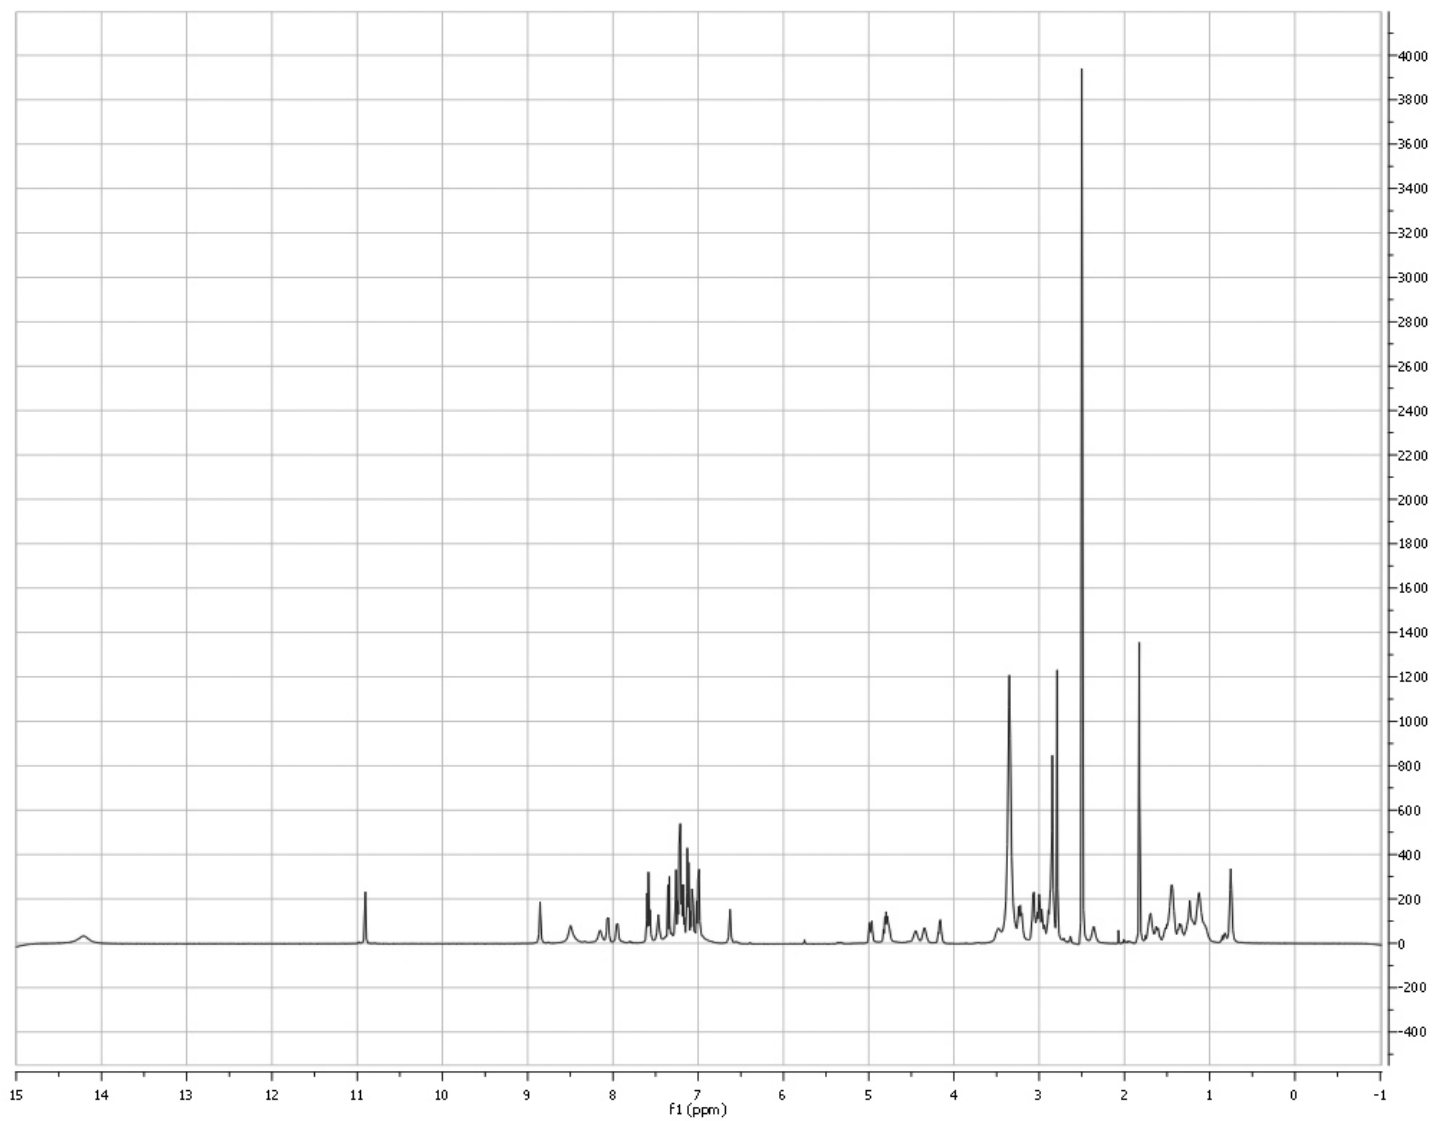

**Figure 10B:**  $^1\text{H-NMR}$  spectrum of compound 10.

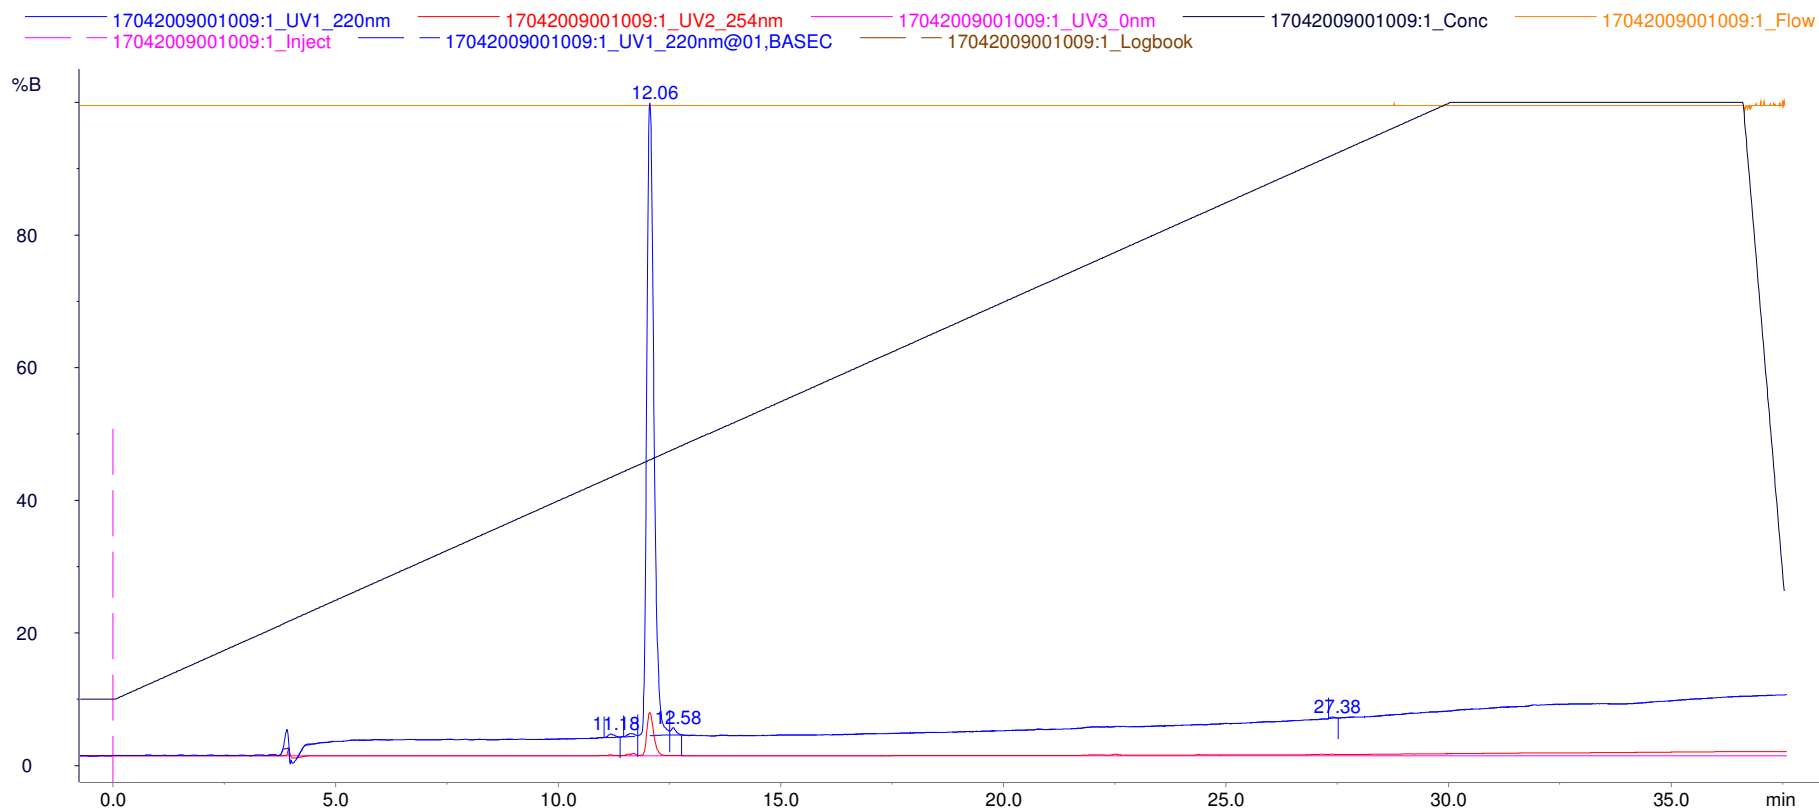

**Figure 11A:** HPLC chromatogram of compound 11.

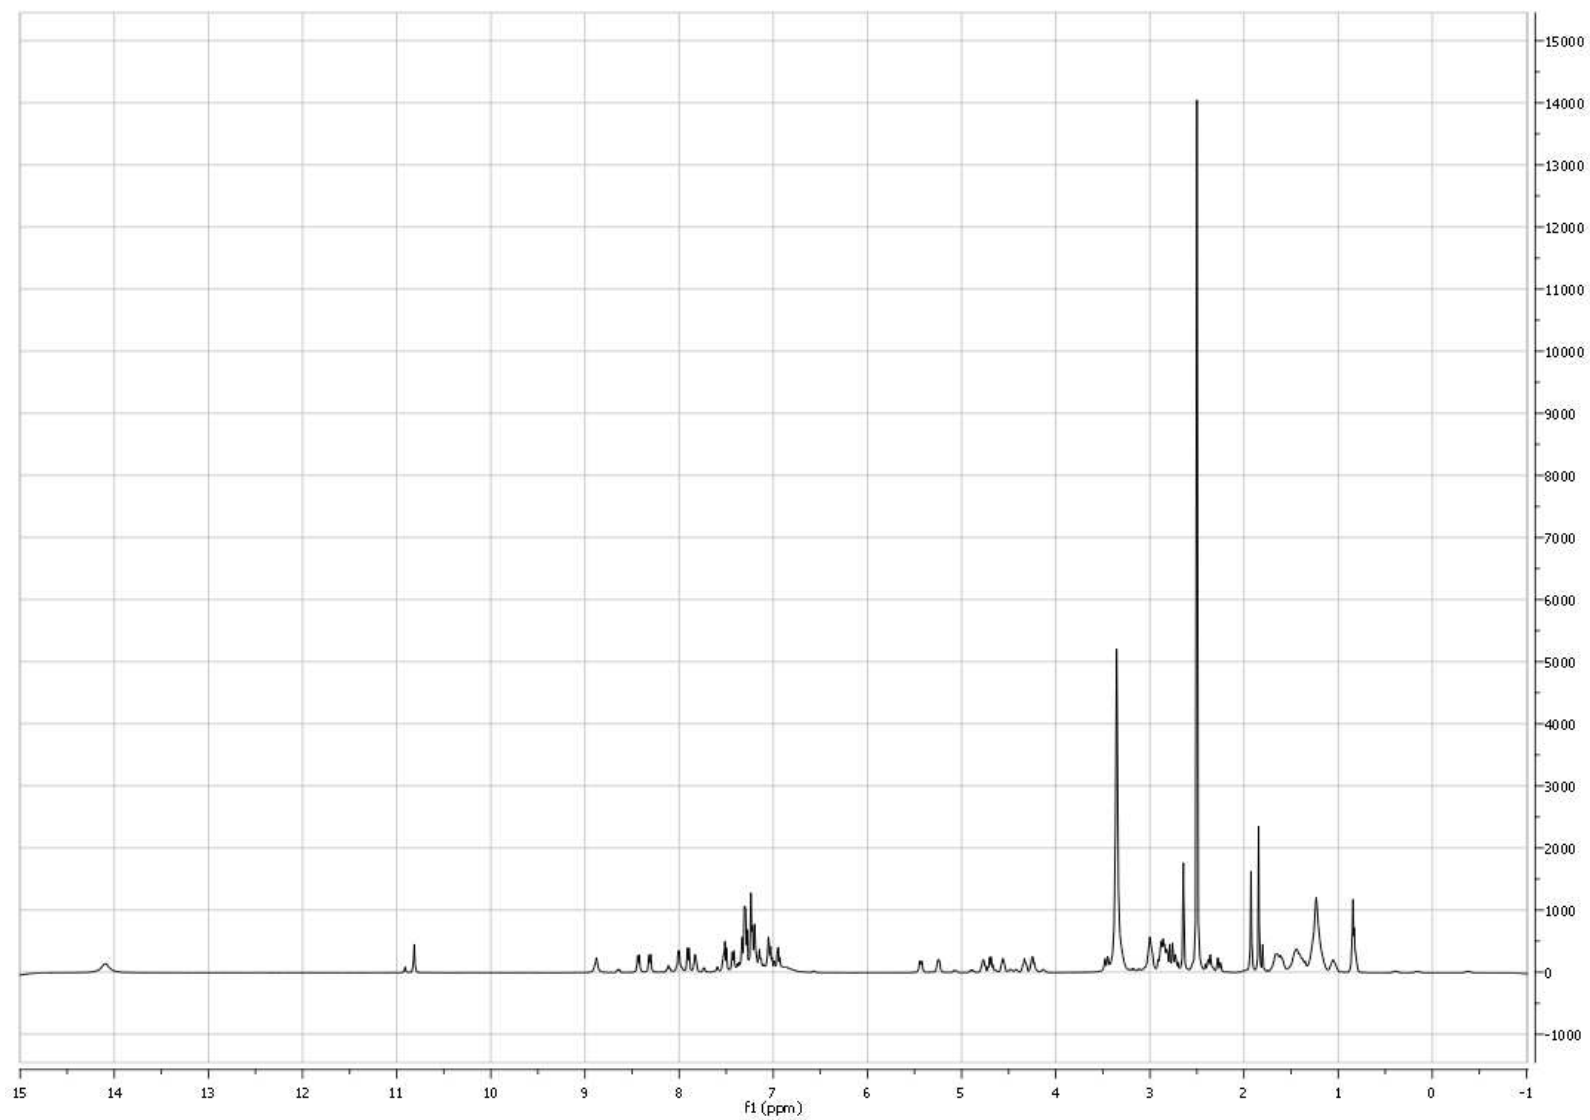

**Figure 11B:**  $^1\text{H-NMR}$  spectrum of compound 11.



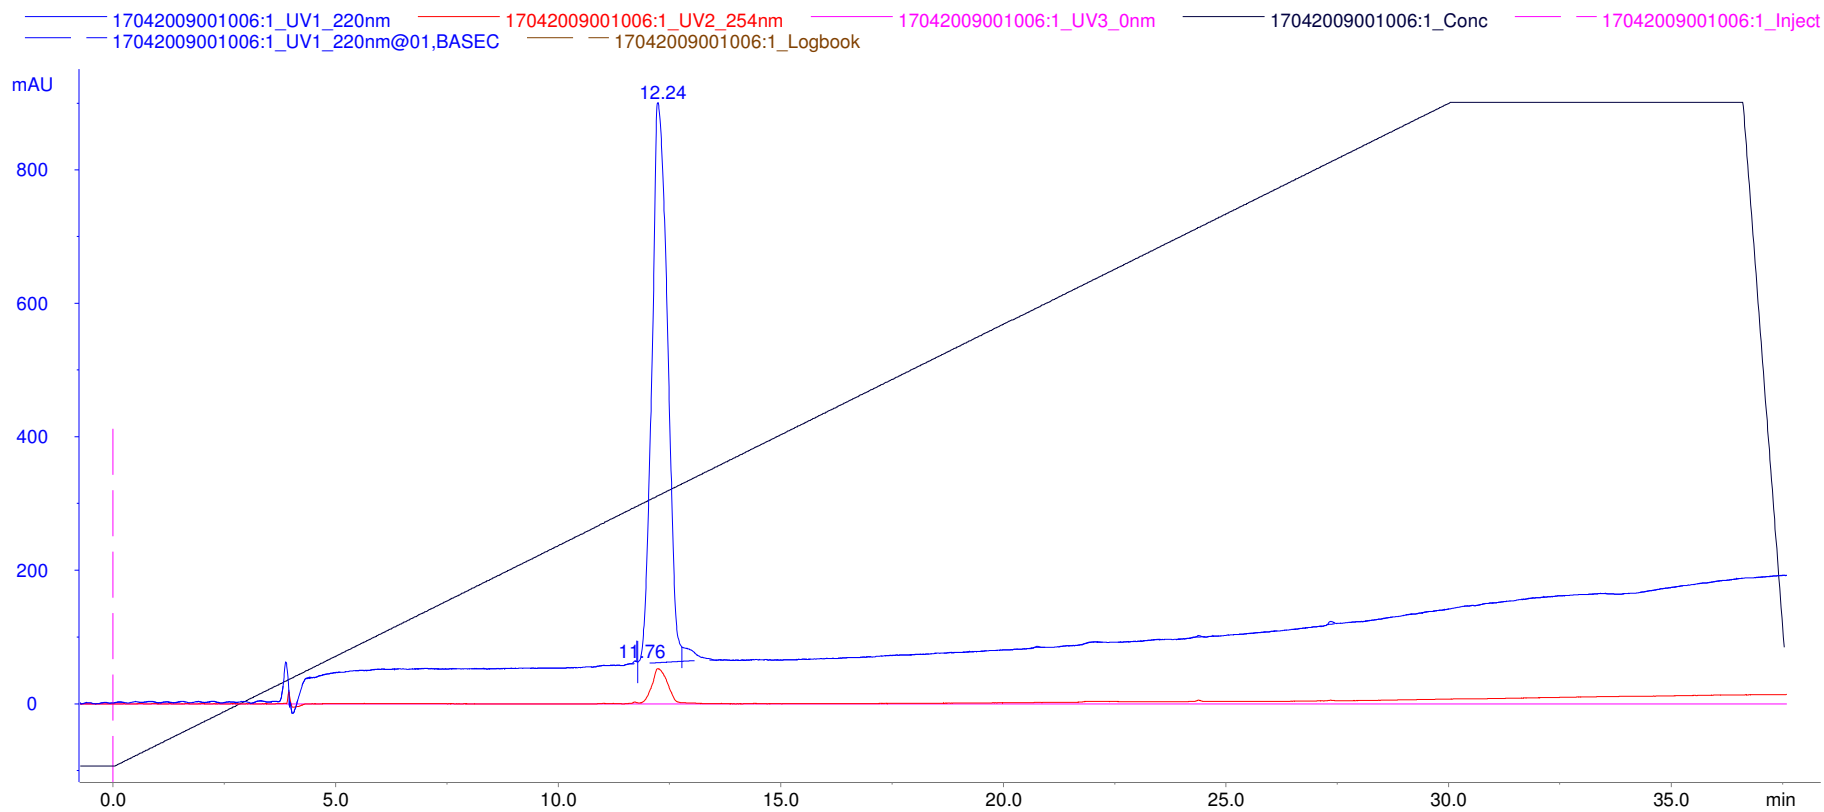

**Figure 12A:** HPLC chromatogram of compound 12.

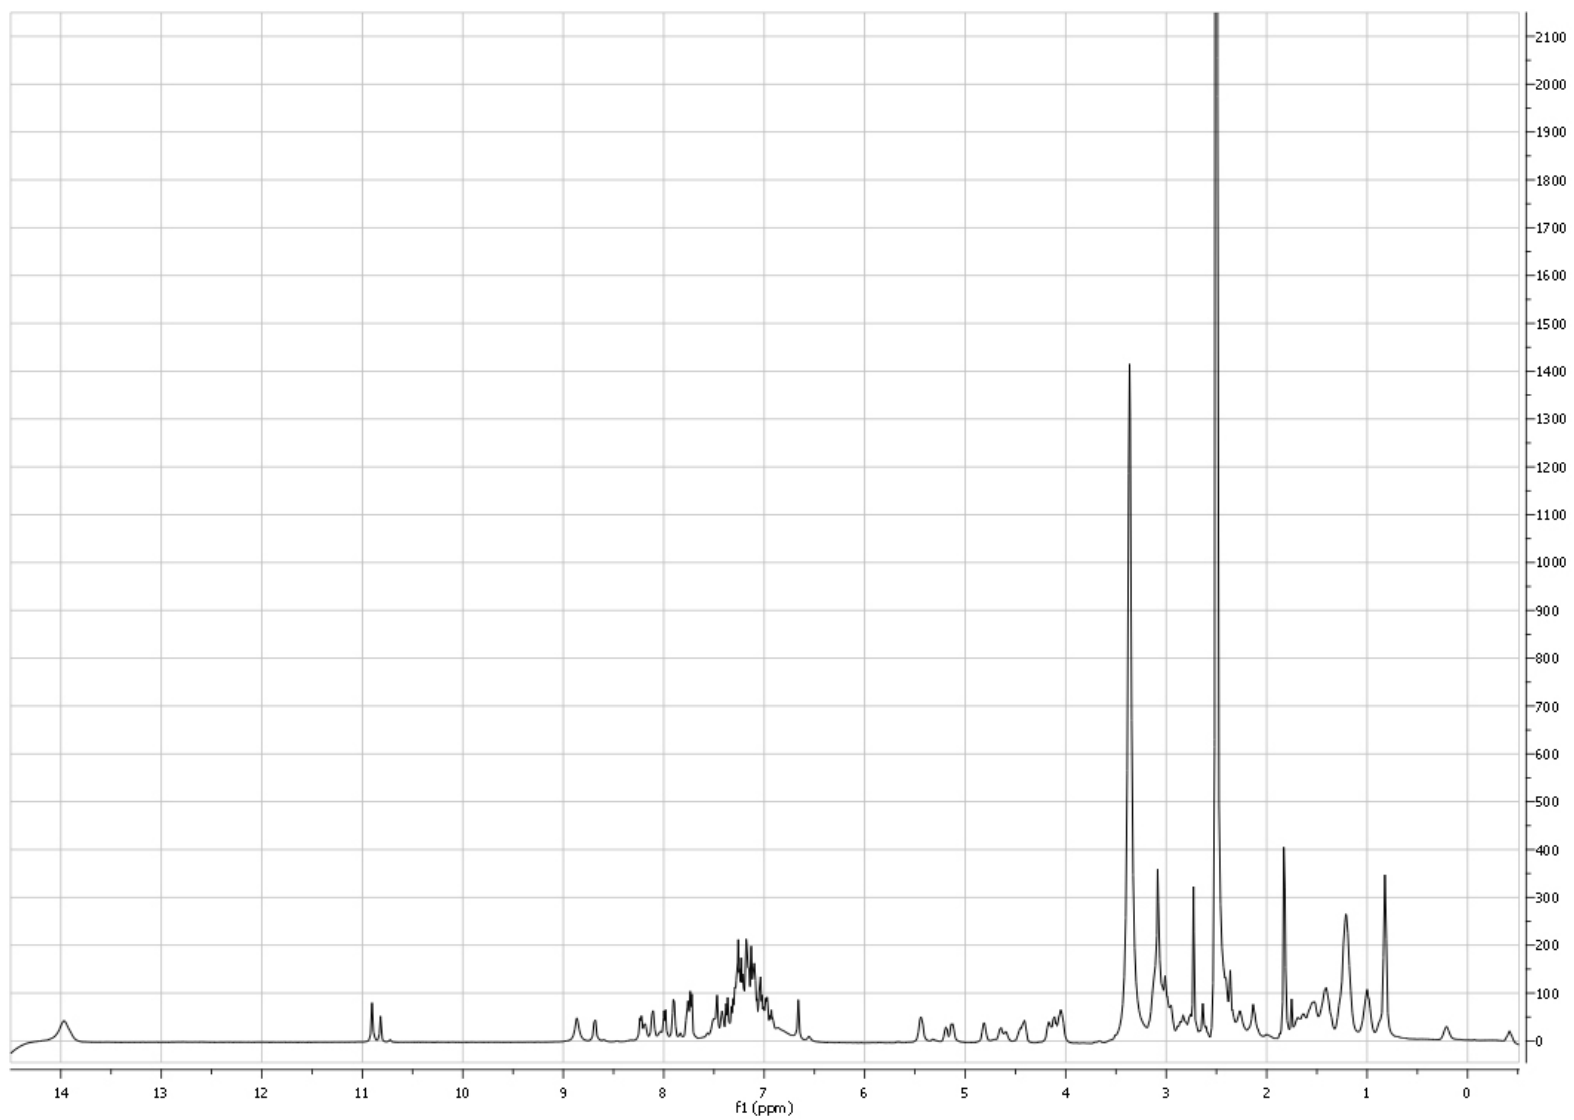

**Figure 12B:** <sup>1</sup>H-NMR spectrum of compound 12.

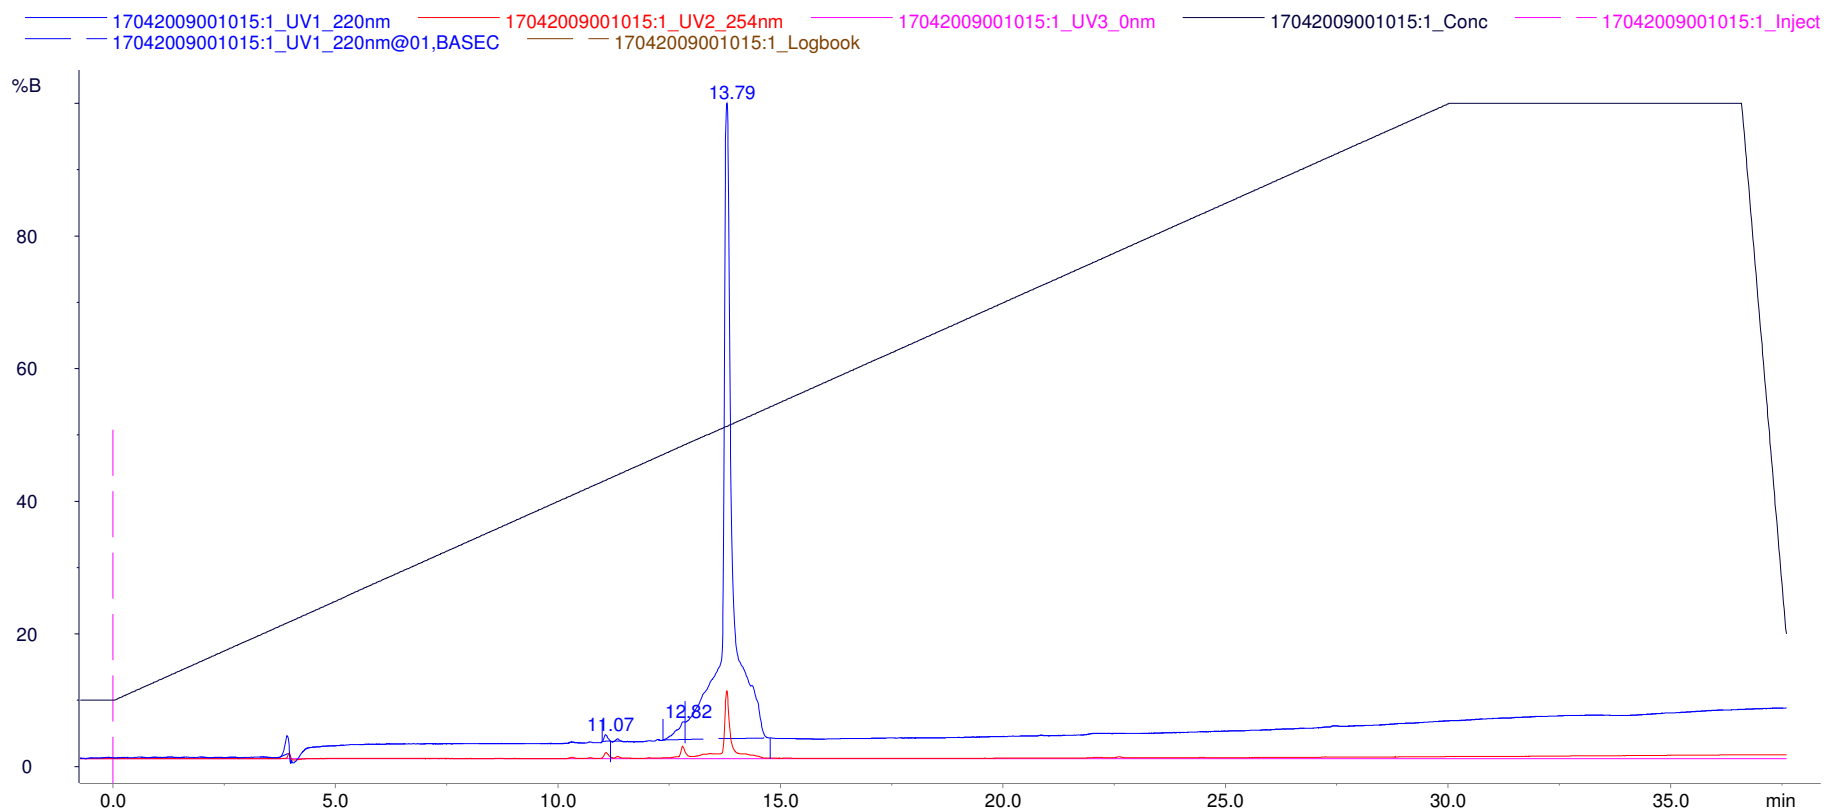

**Figure 13A:** HPLC chromatogram of compound 13.

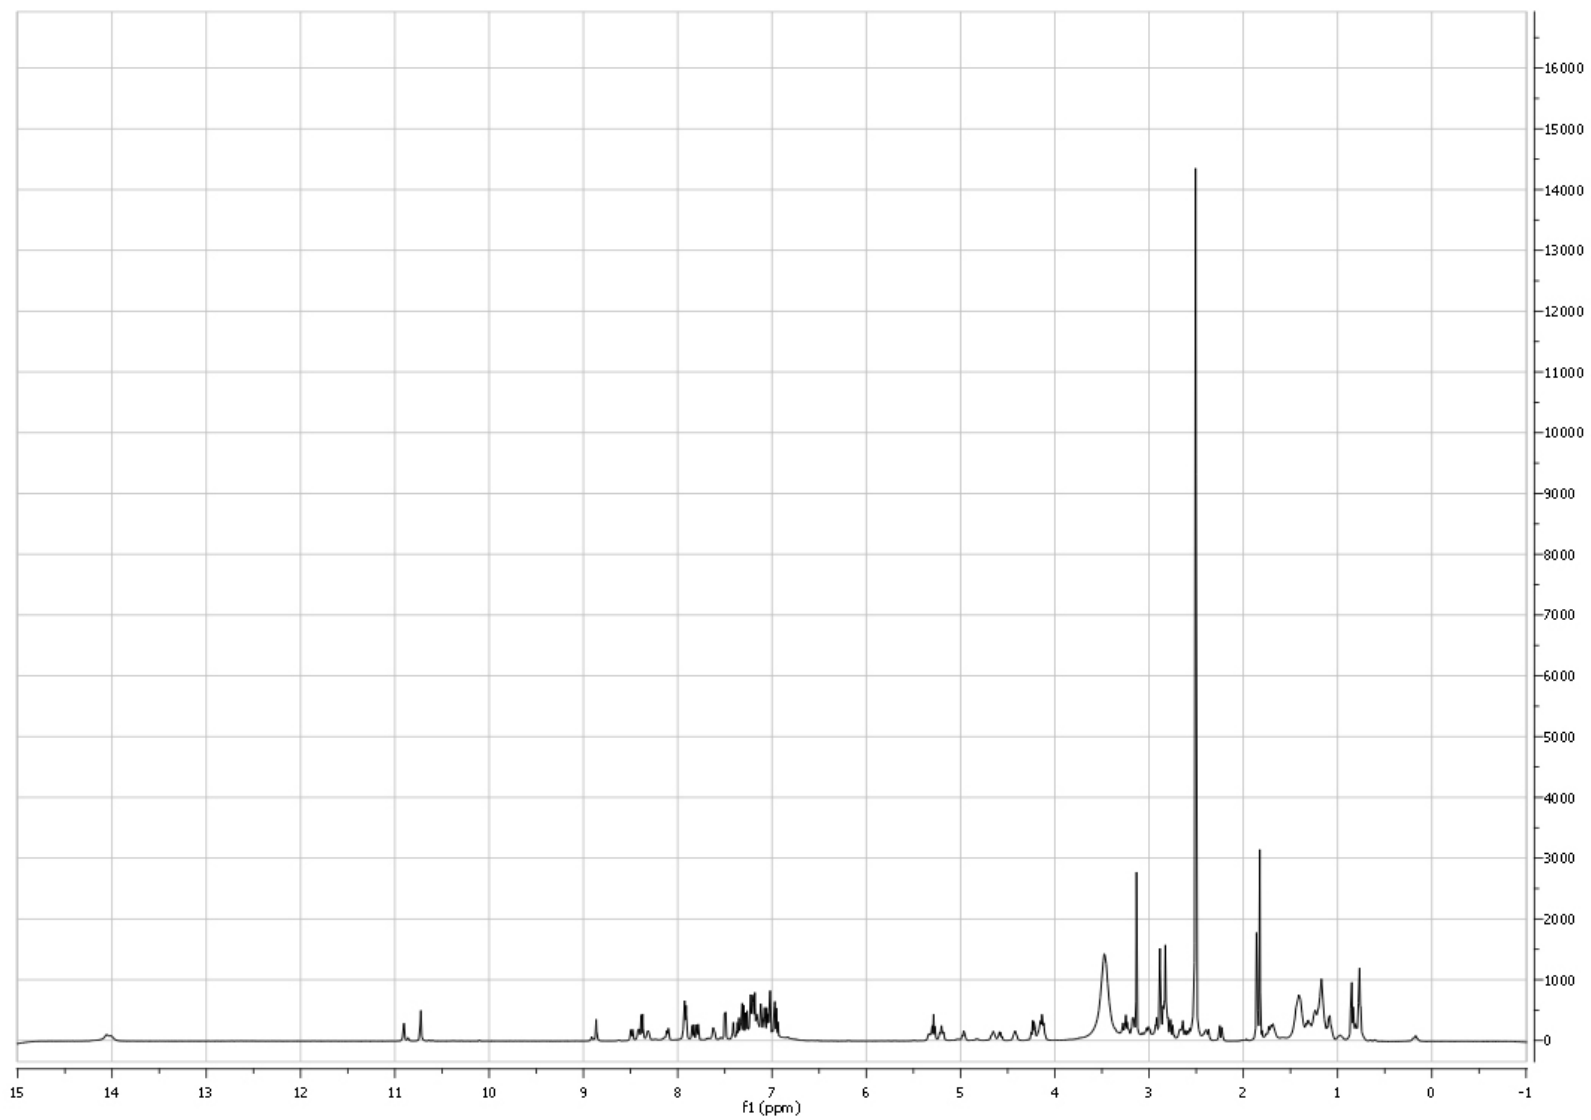

**Figure 13B:**  $^1\text{H-NMR}$  spectrum of compound 13.

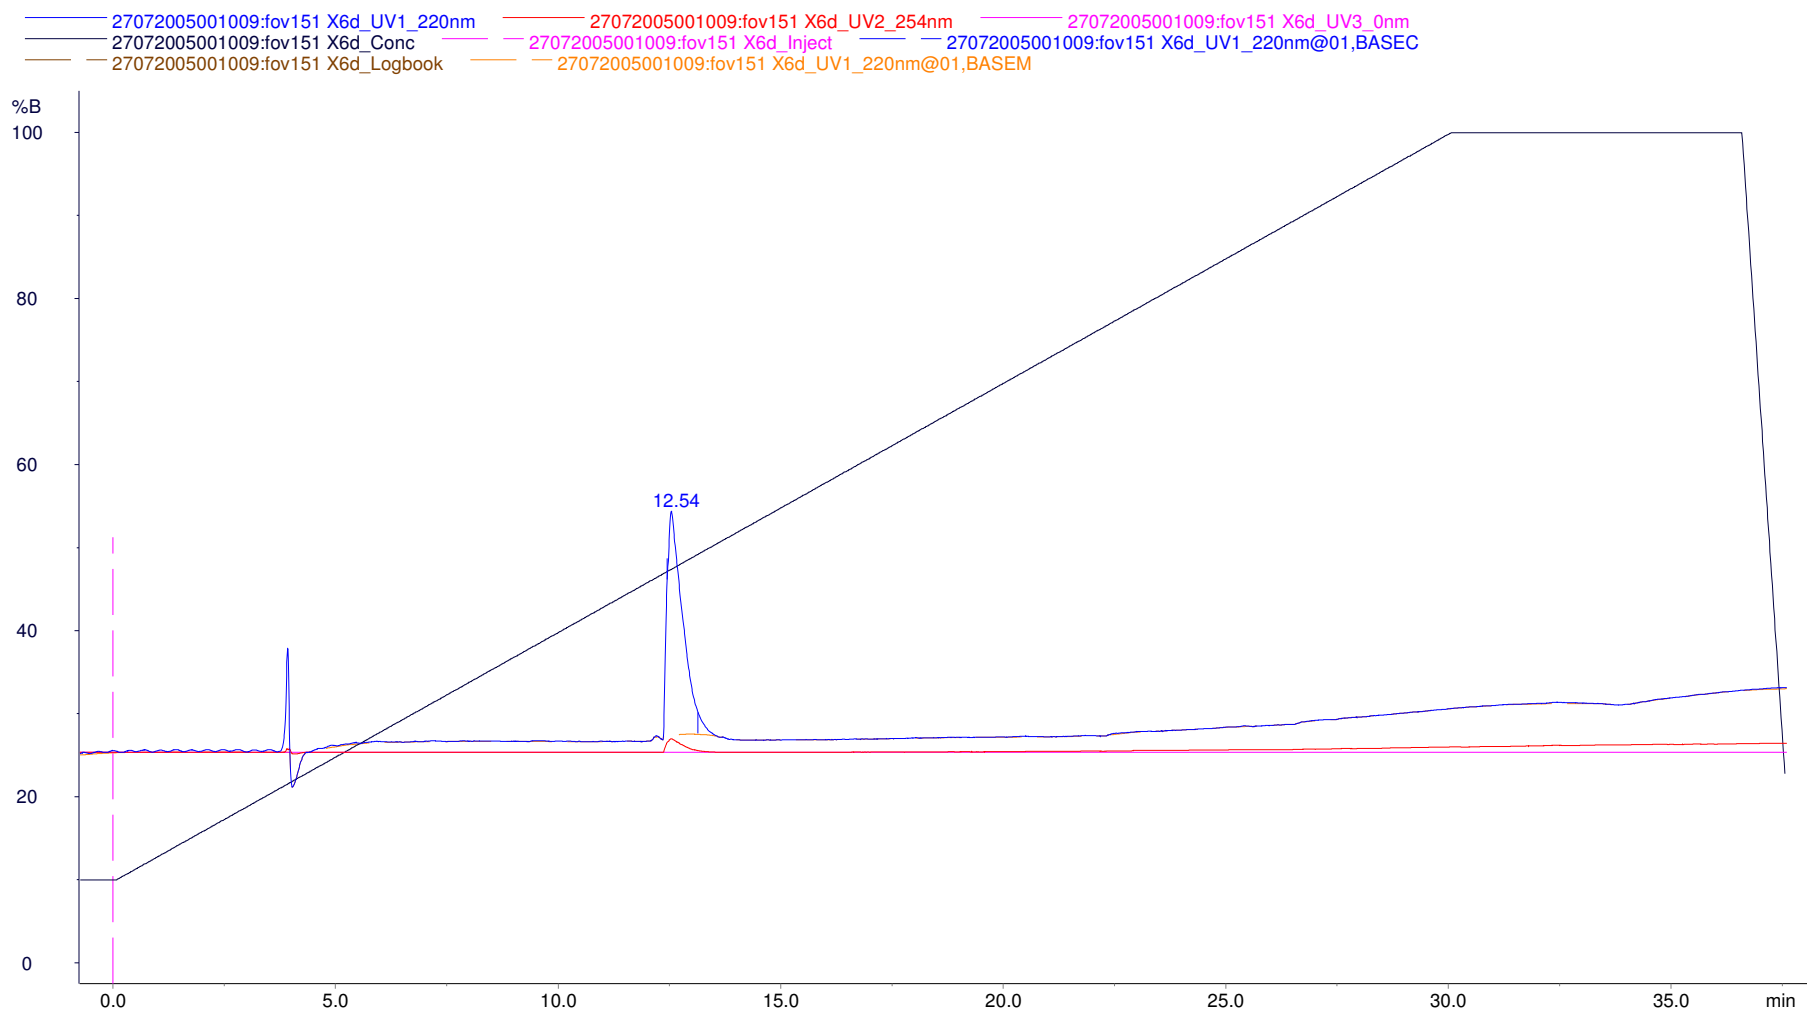

**Figure 14A:** HPLC chromatogram of compound 14.

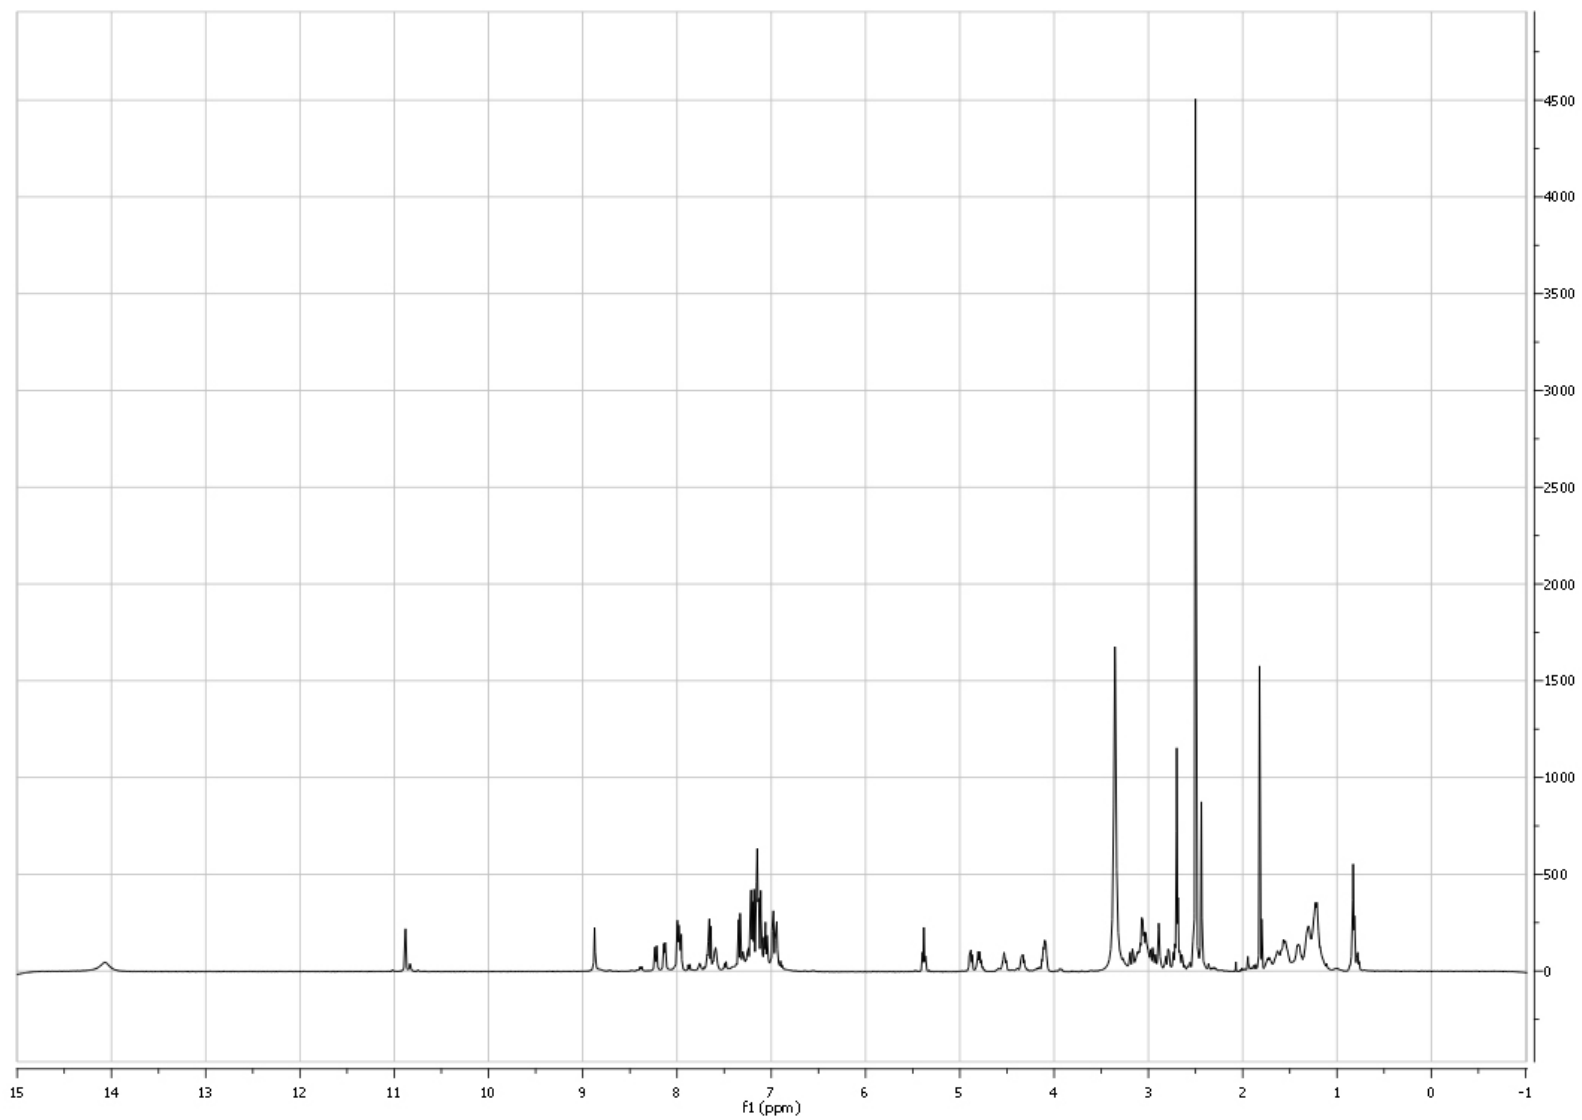

**Figure 14B:**  $^1\text{H-NMR}$  spectrum of compound 14.

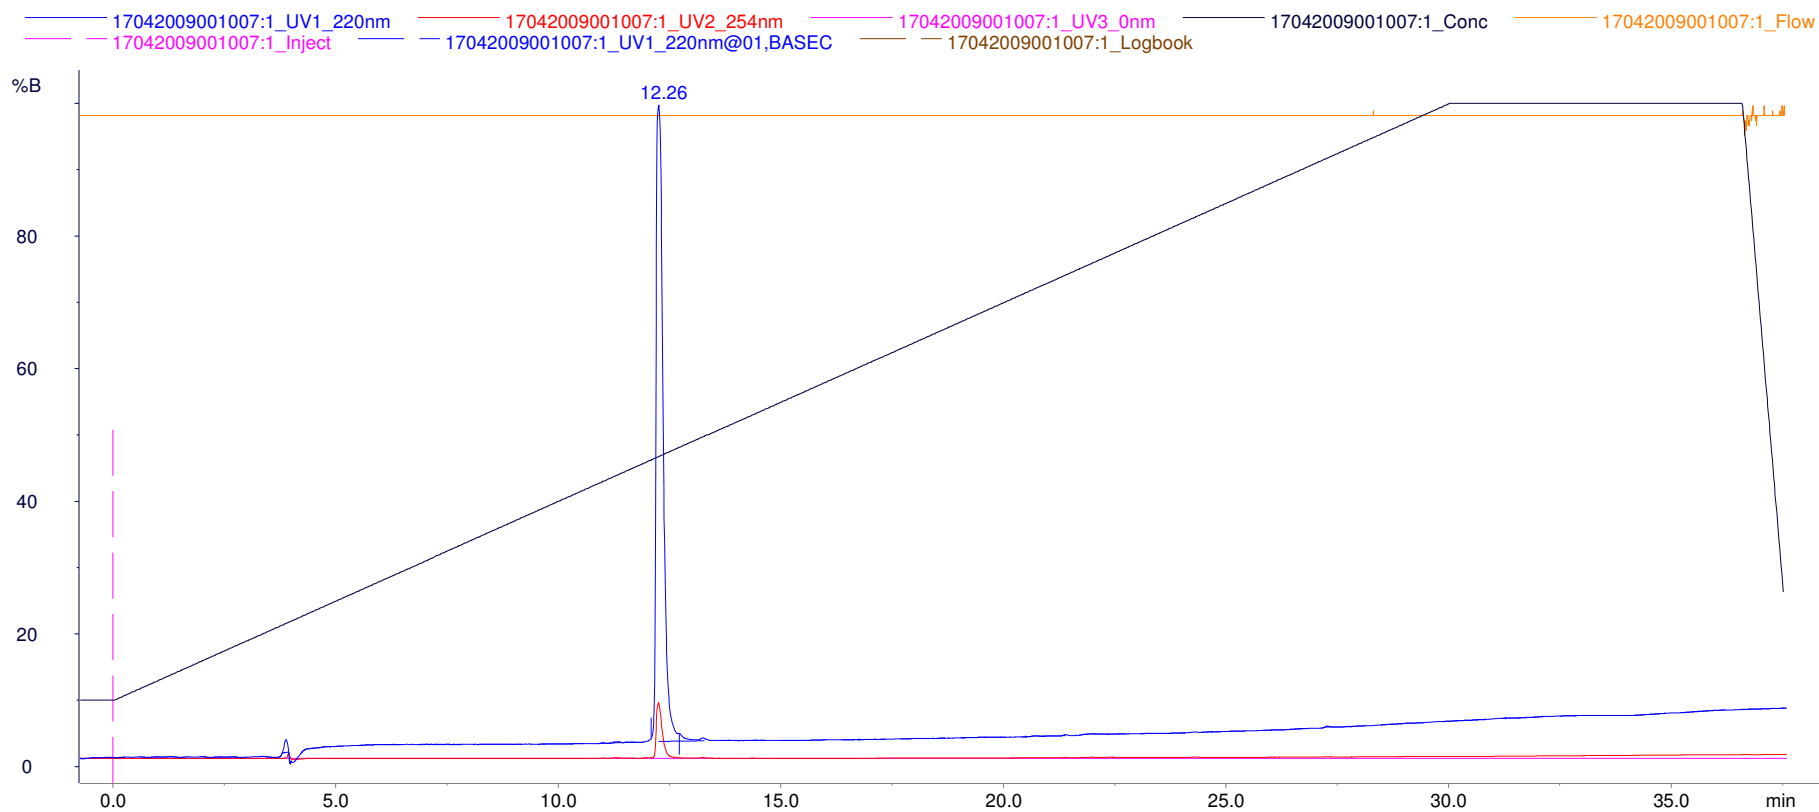

**Figure 15A:** HPLC chromatogram of compound 15.

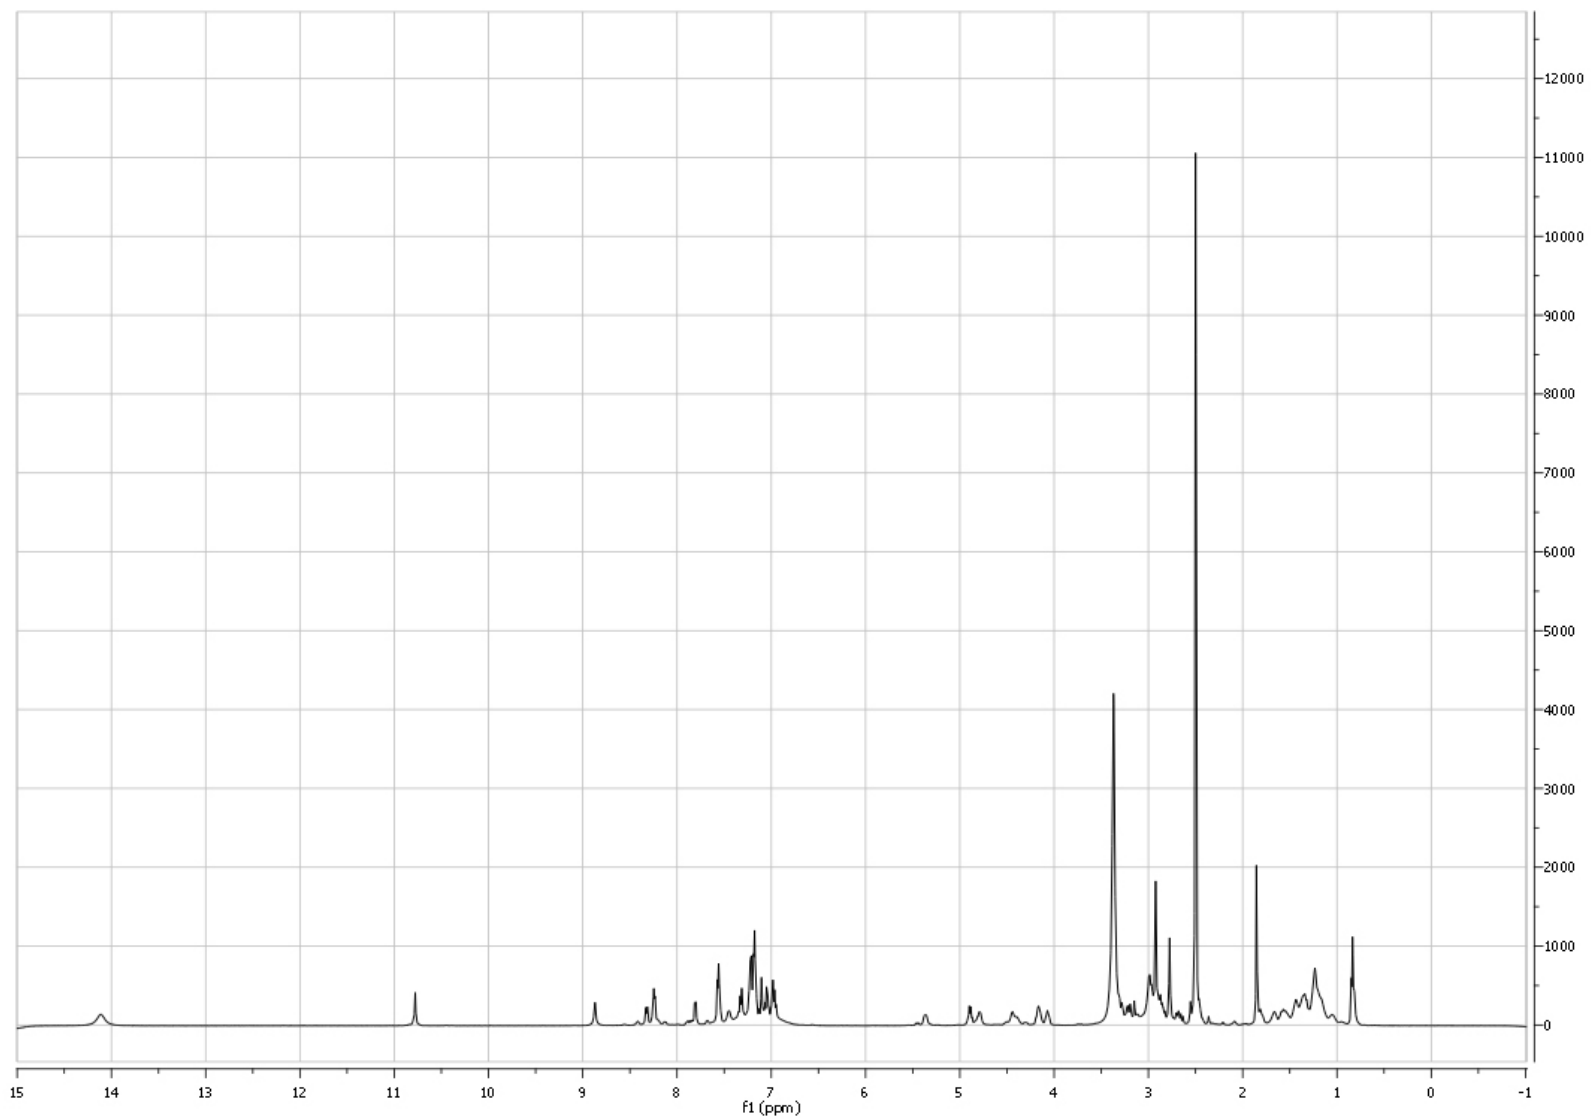

**Figure 15B:** <sup>1</sup>H-NMR spectrum of compound 15.



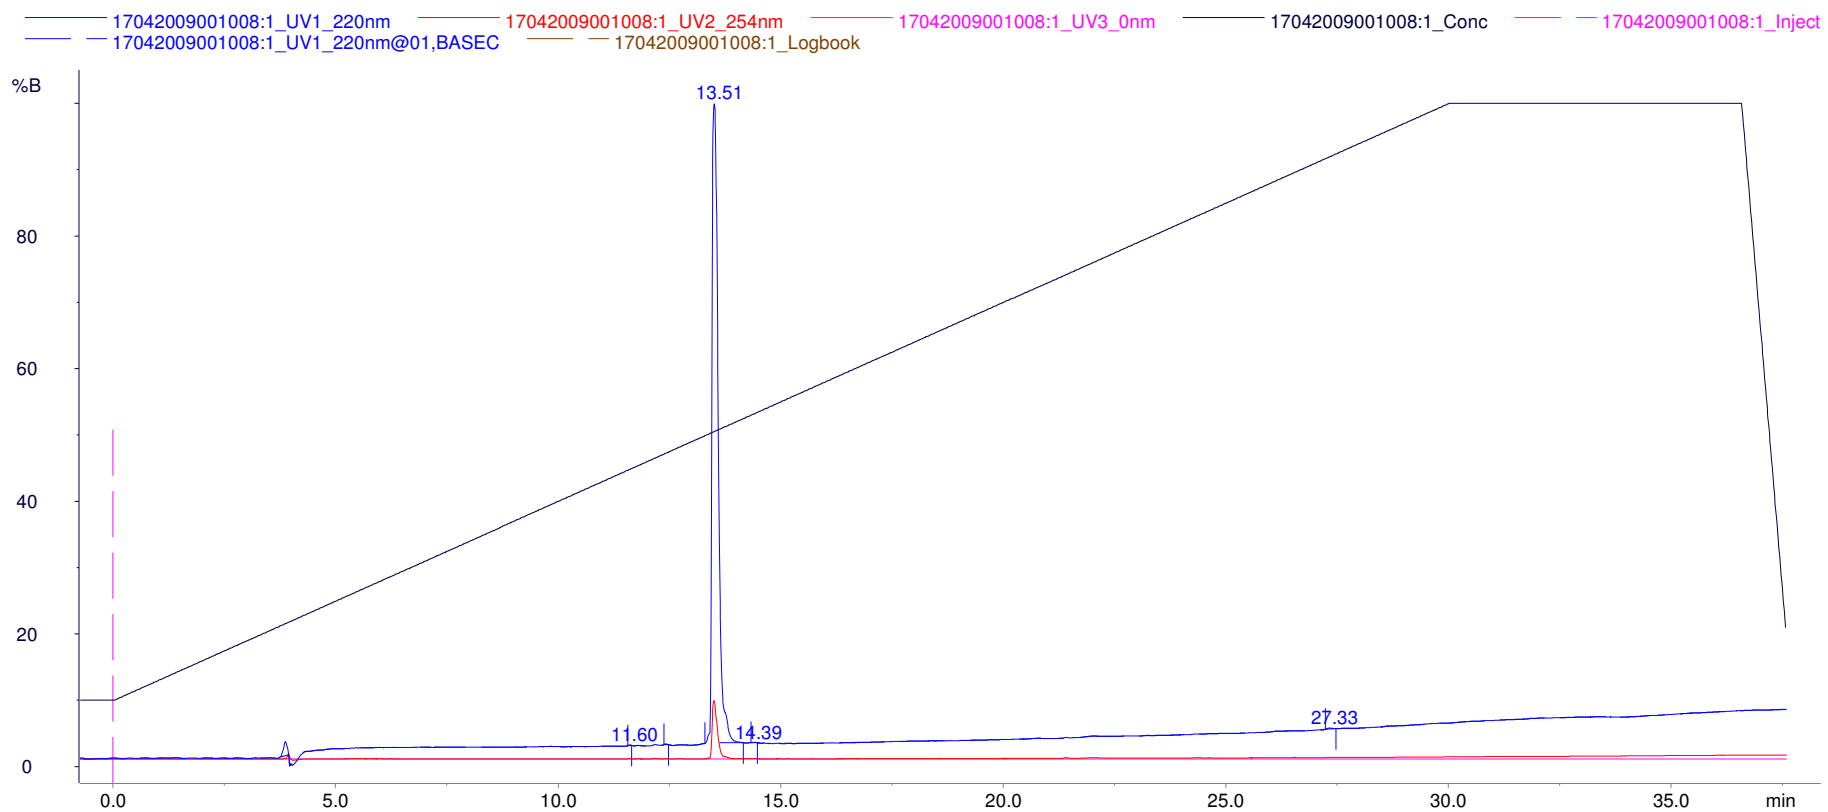

Figure 16A: HPLC chromatogram of compound 16.

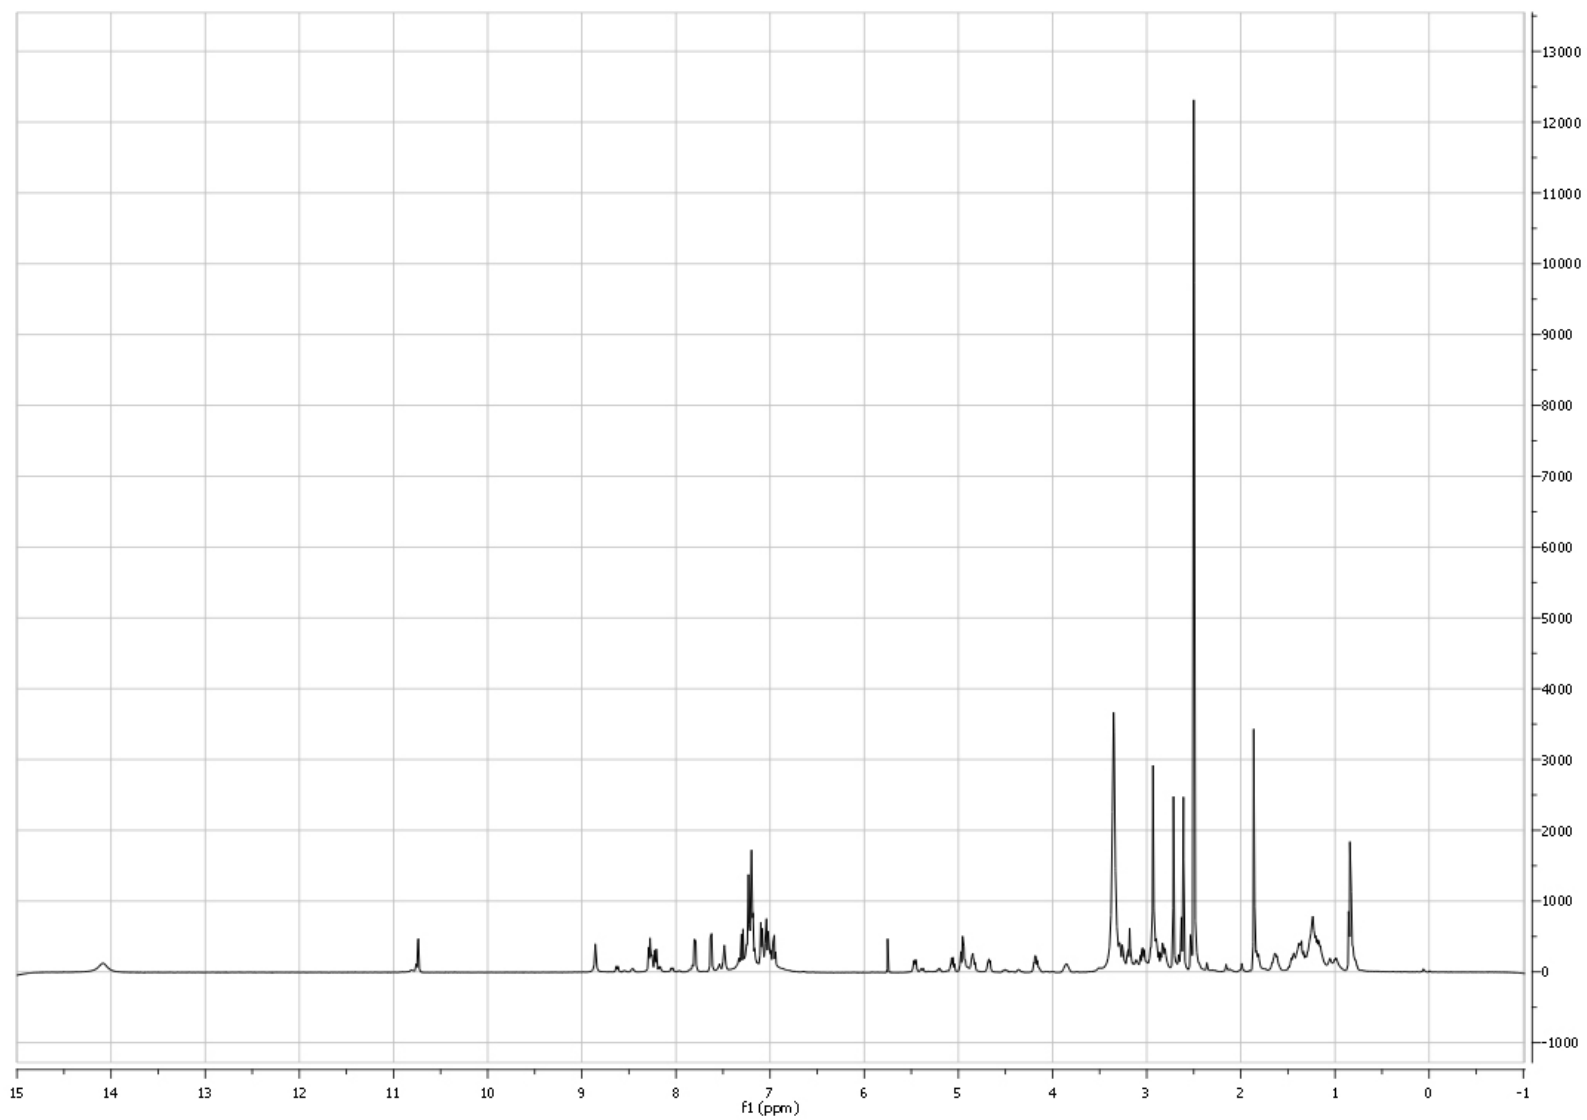

**Figure 16B:**  $^1\text{H}$ -NMR spectrum of compound 16.

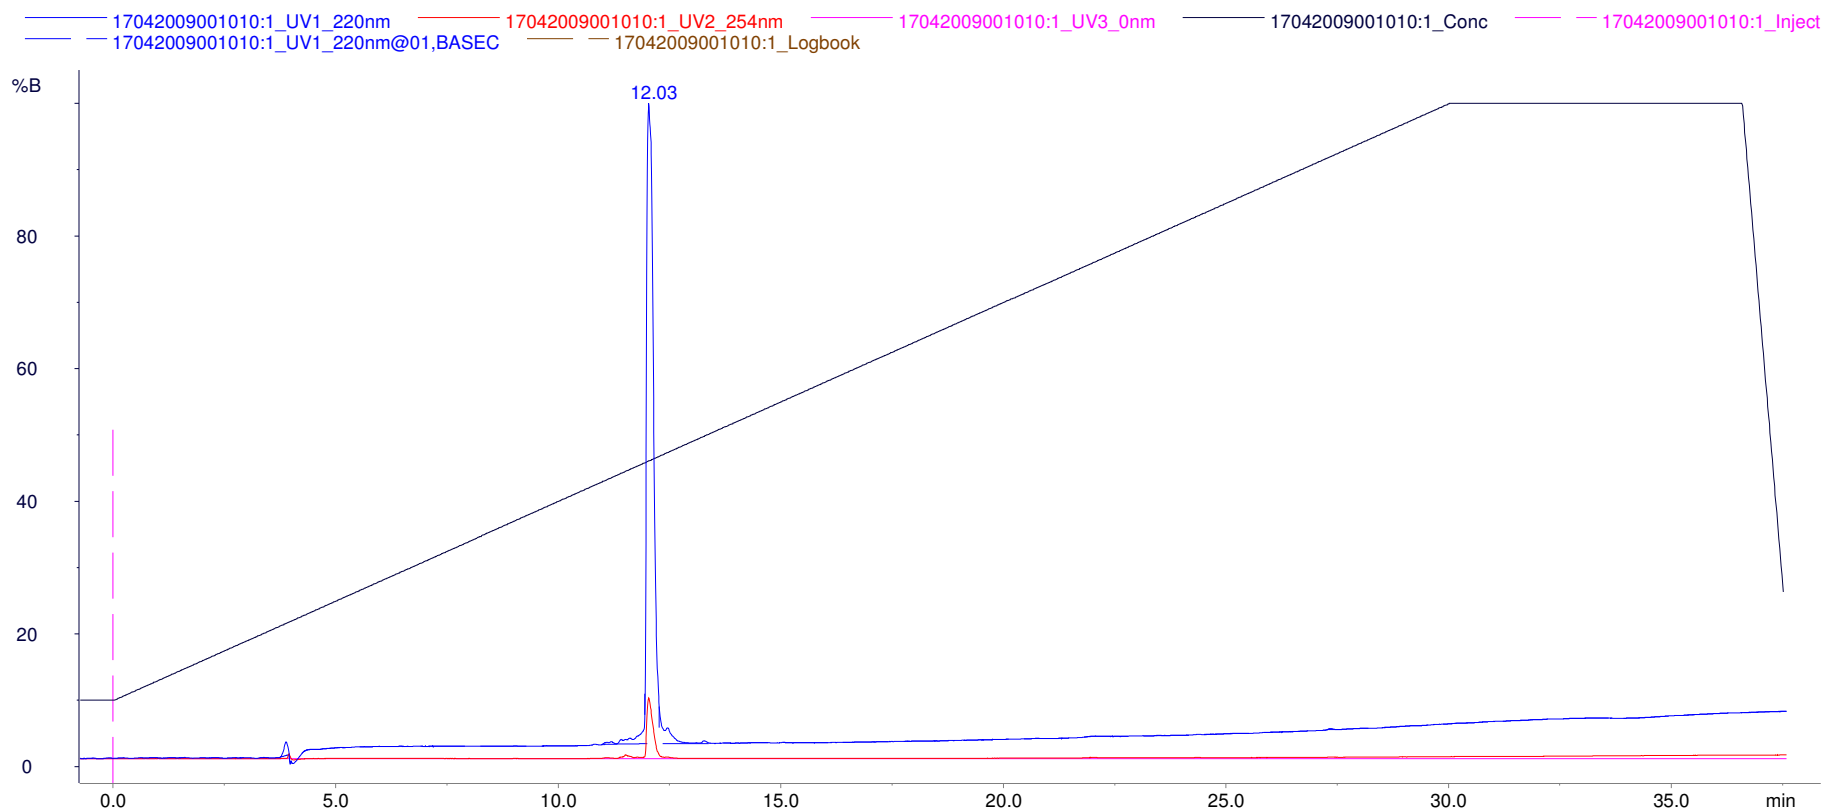

**Figure 17A:** HPLC chromatogram of compound 17.

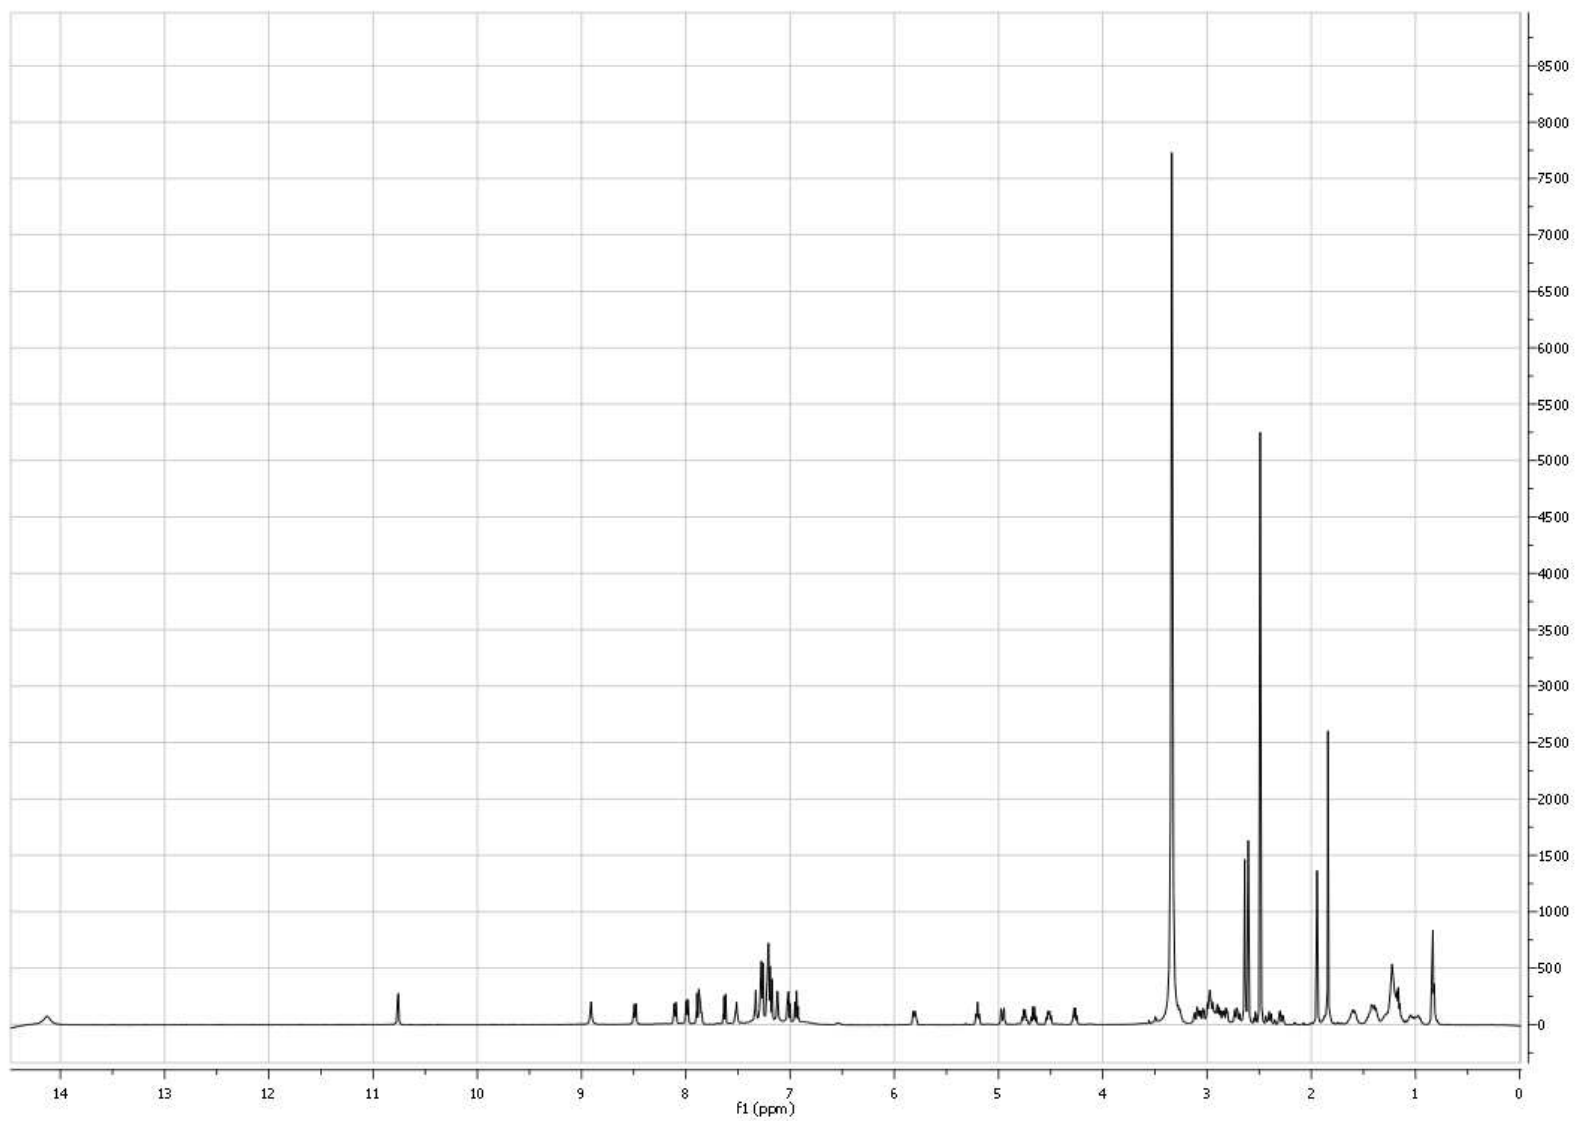

**Figure 17B:** <sup>1</sup>H-NMR spectrum of compound 17.

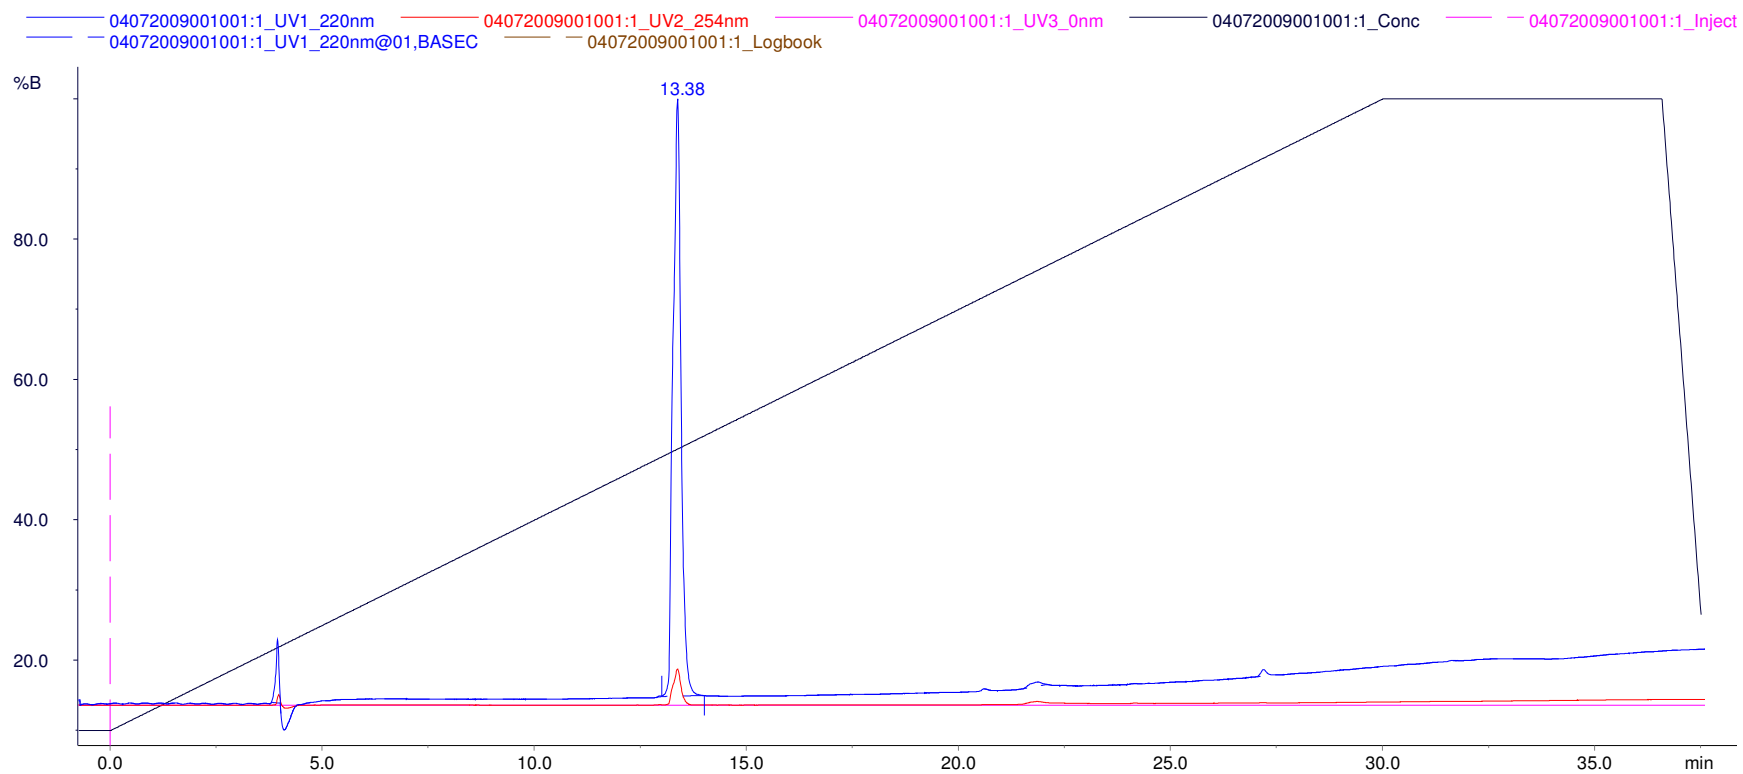

**Figure 18A:** HPLC chromatogram of compound 18.

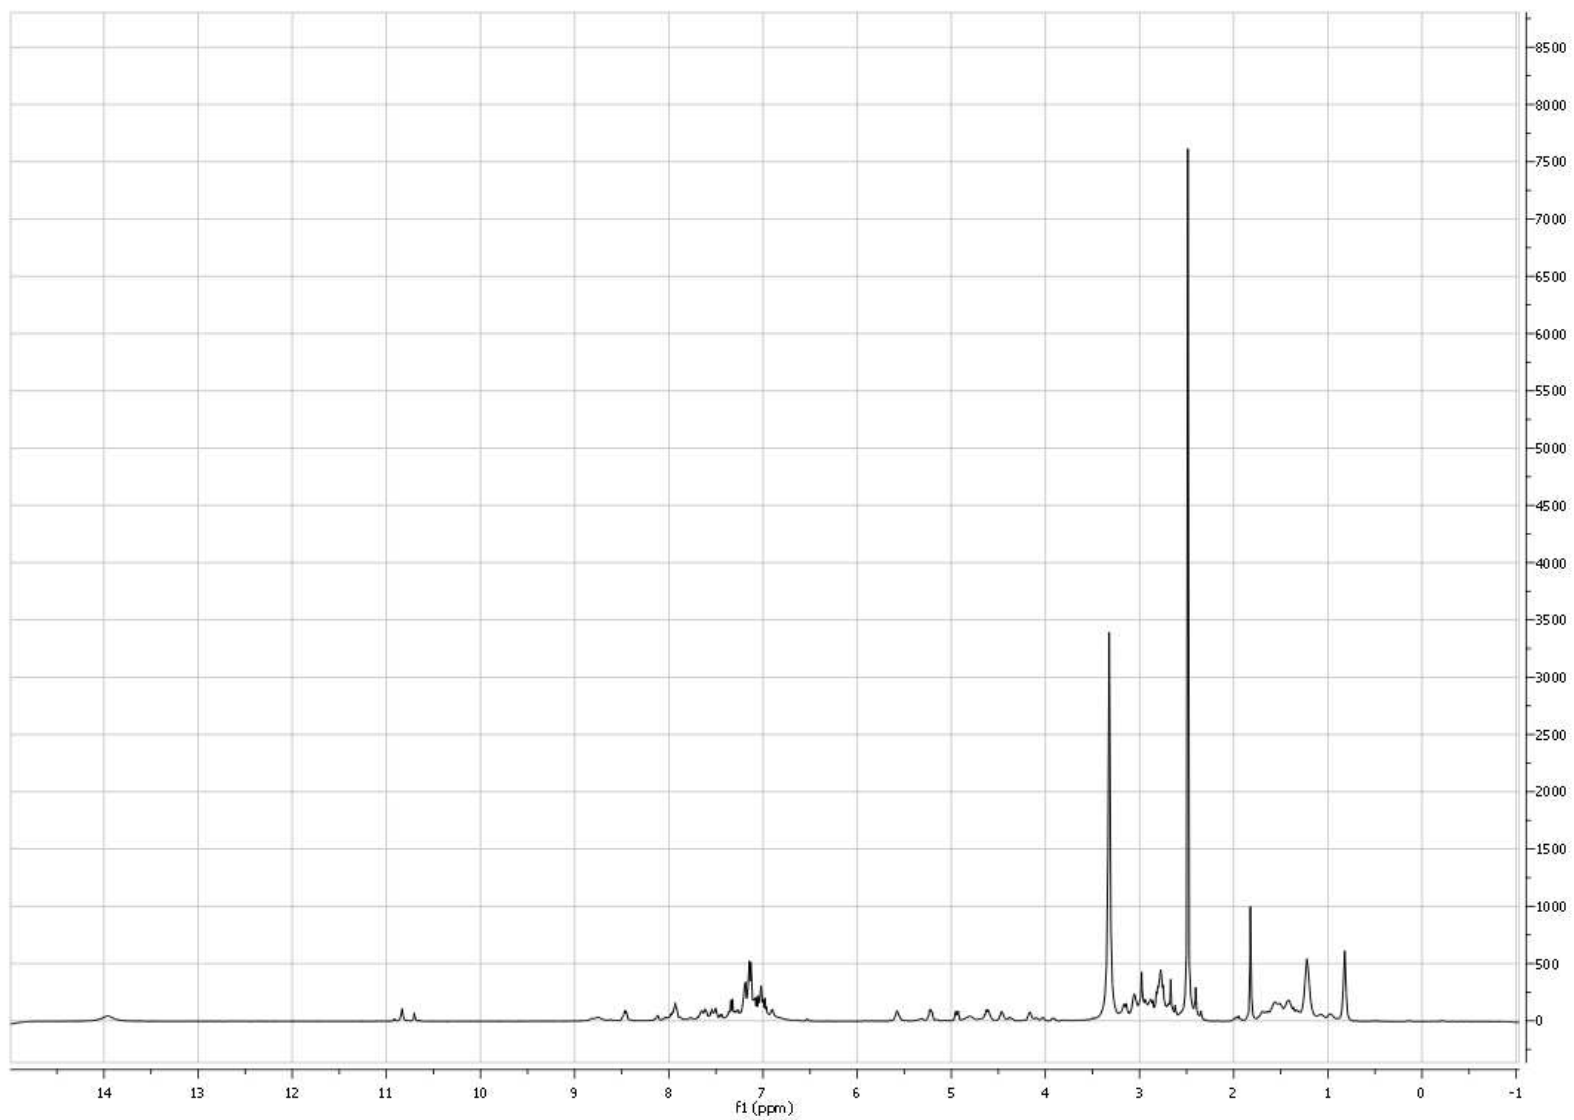

**Figure 18B:** <sup>1</sup>H-NMR spectrum of compound 18.

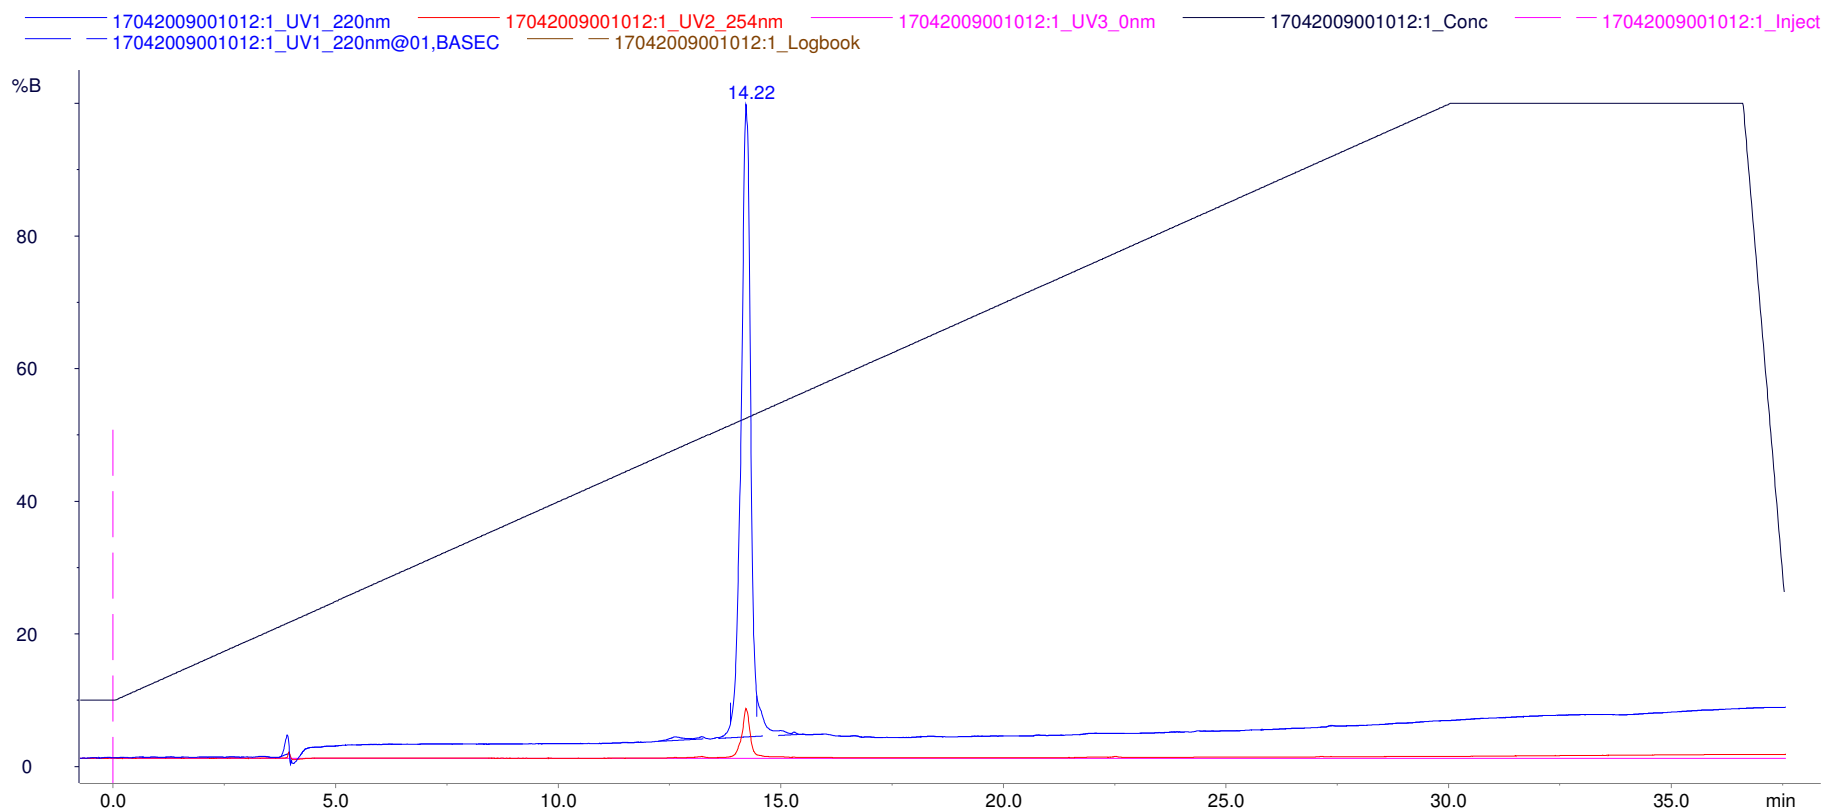

**Figure 19A:** HPLC chromatogram of compound 19.

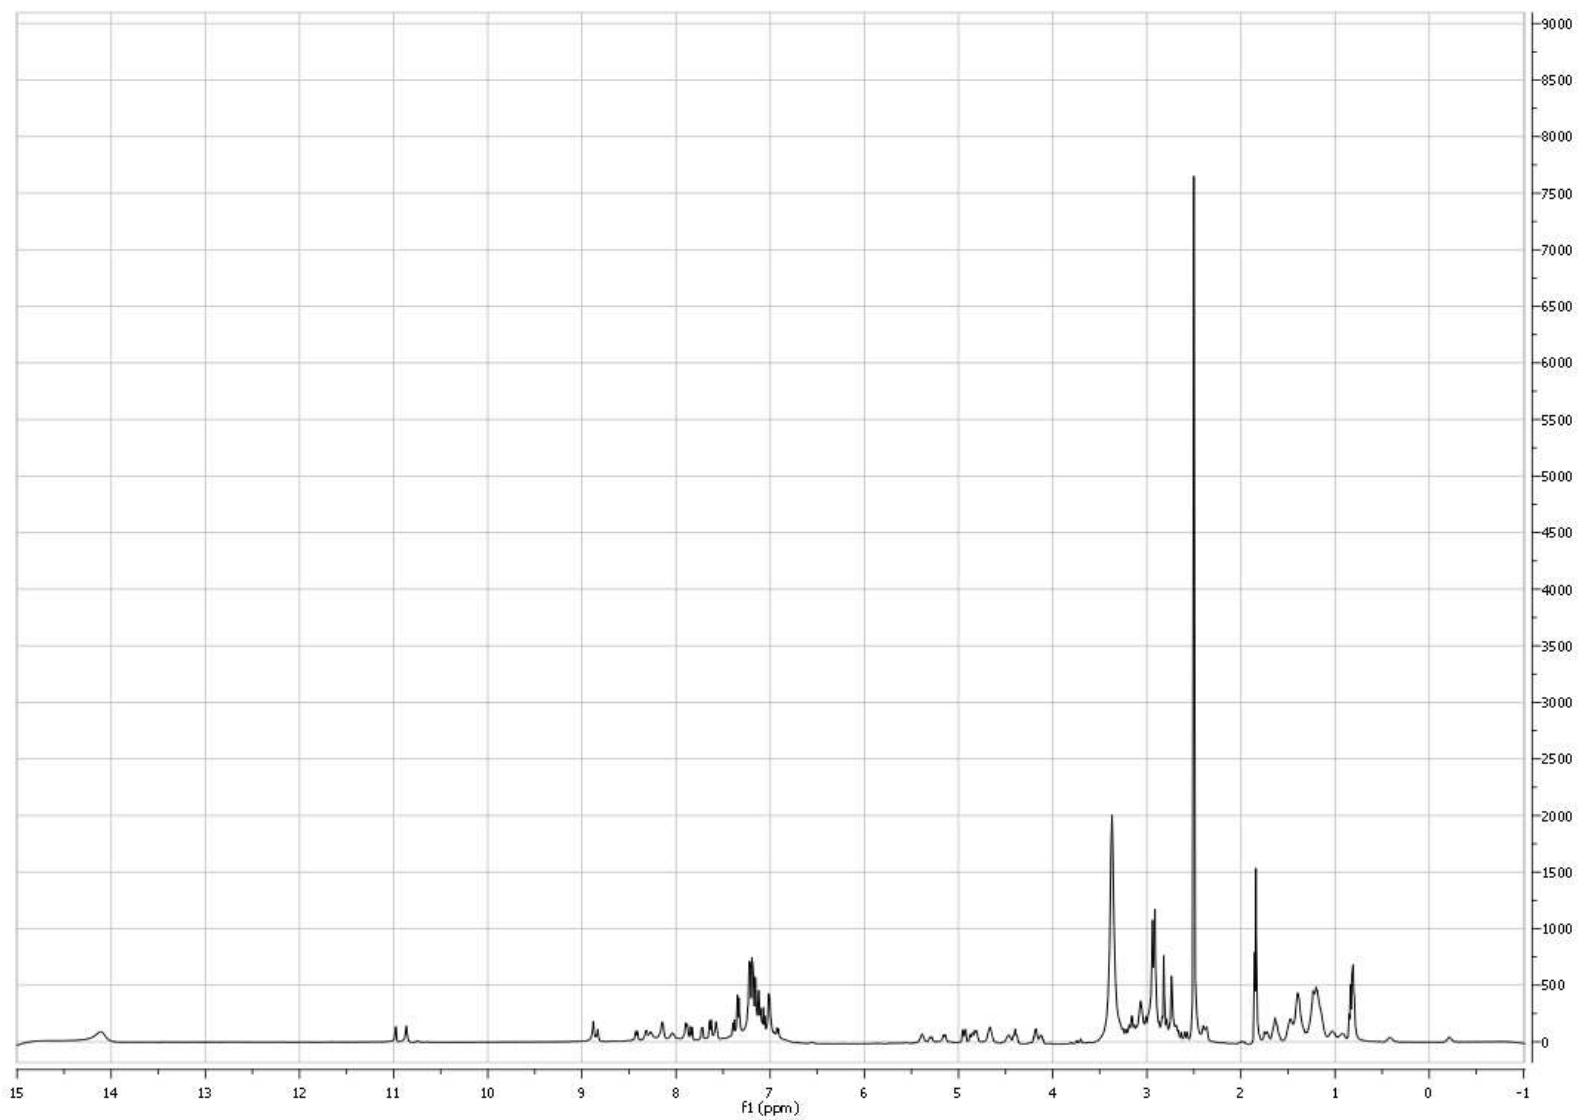

**Figure 19B:** <sup>1</sup>H-NMR spectrum of compound 19.



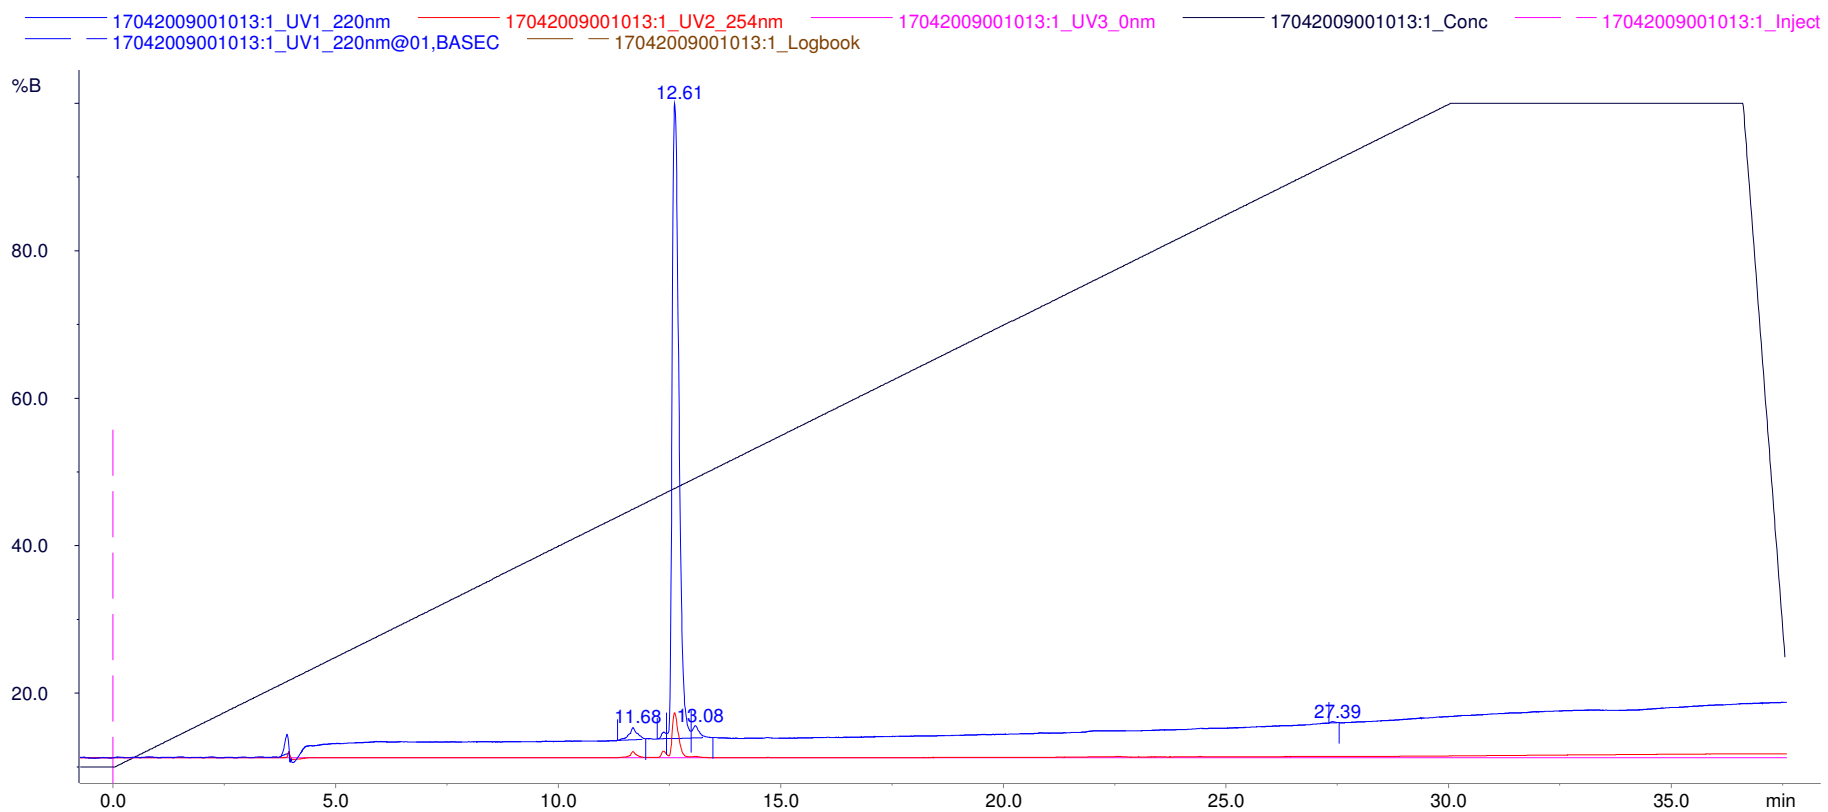

**Figure 20A:** HPLC chromatogram of compound 20.

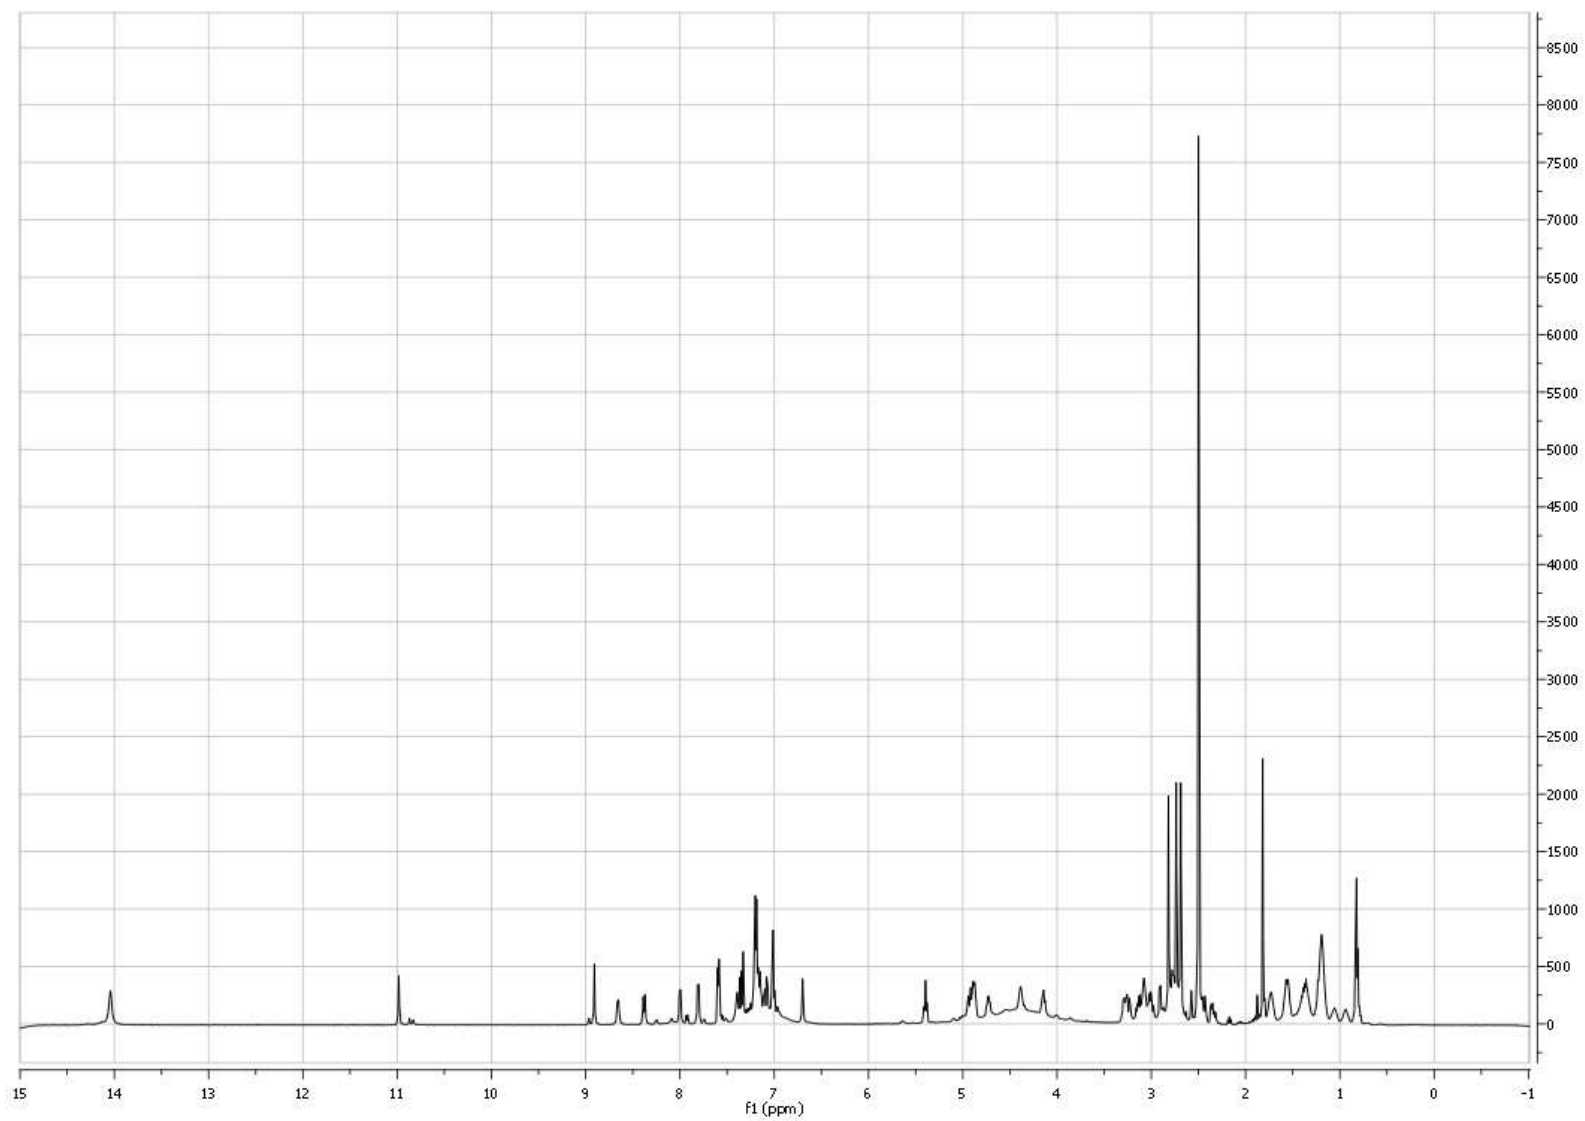

**Figure 20B:** <sup>1</sup>H-NMR spectrum of compound 20.

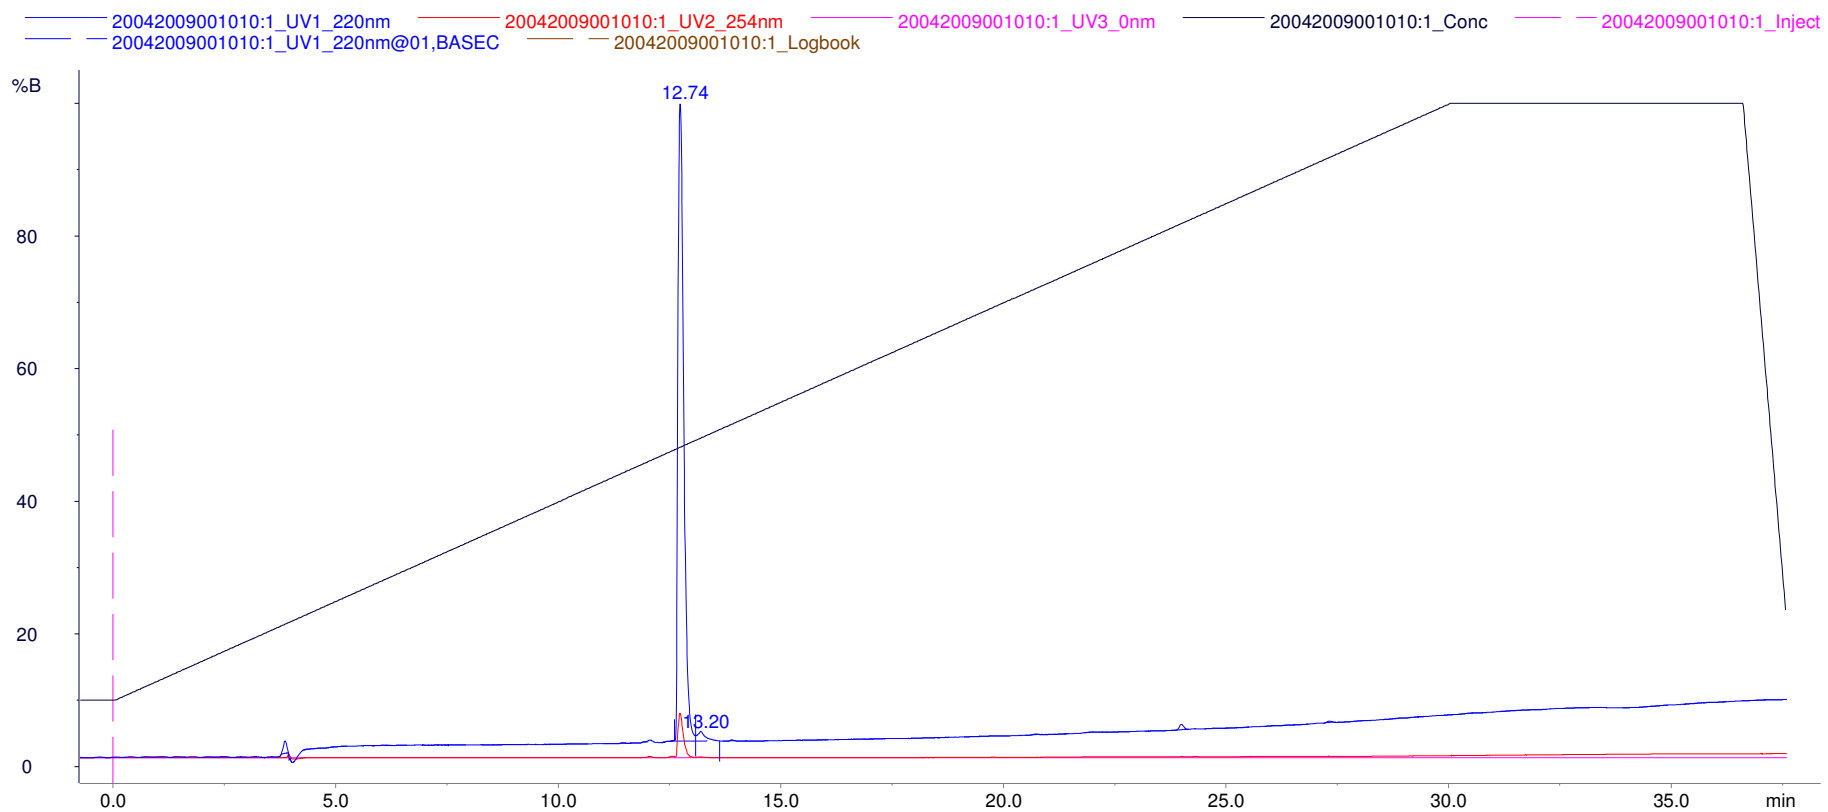

**Figure 21A:** HPLC chromatogram of compound 21.

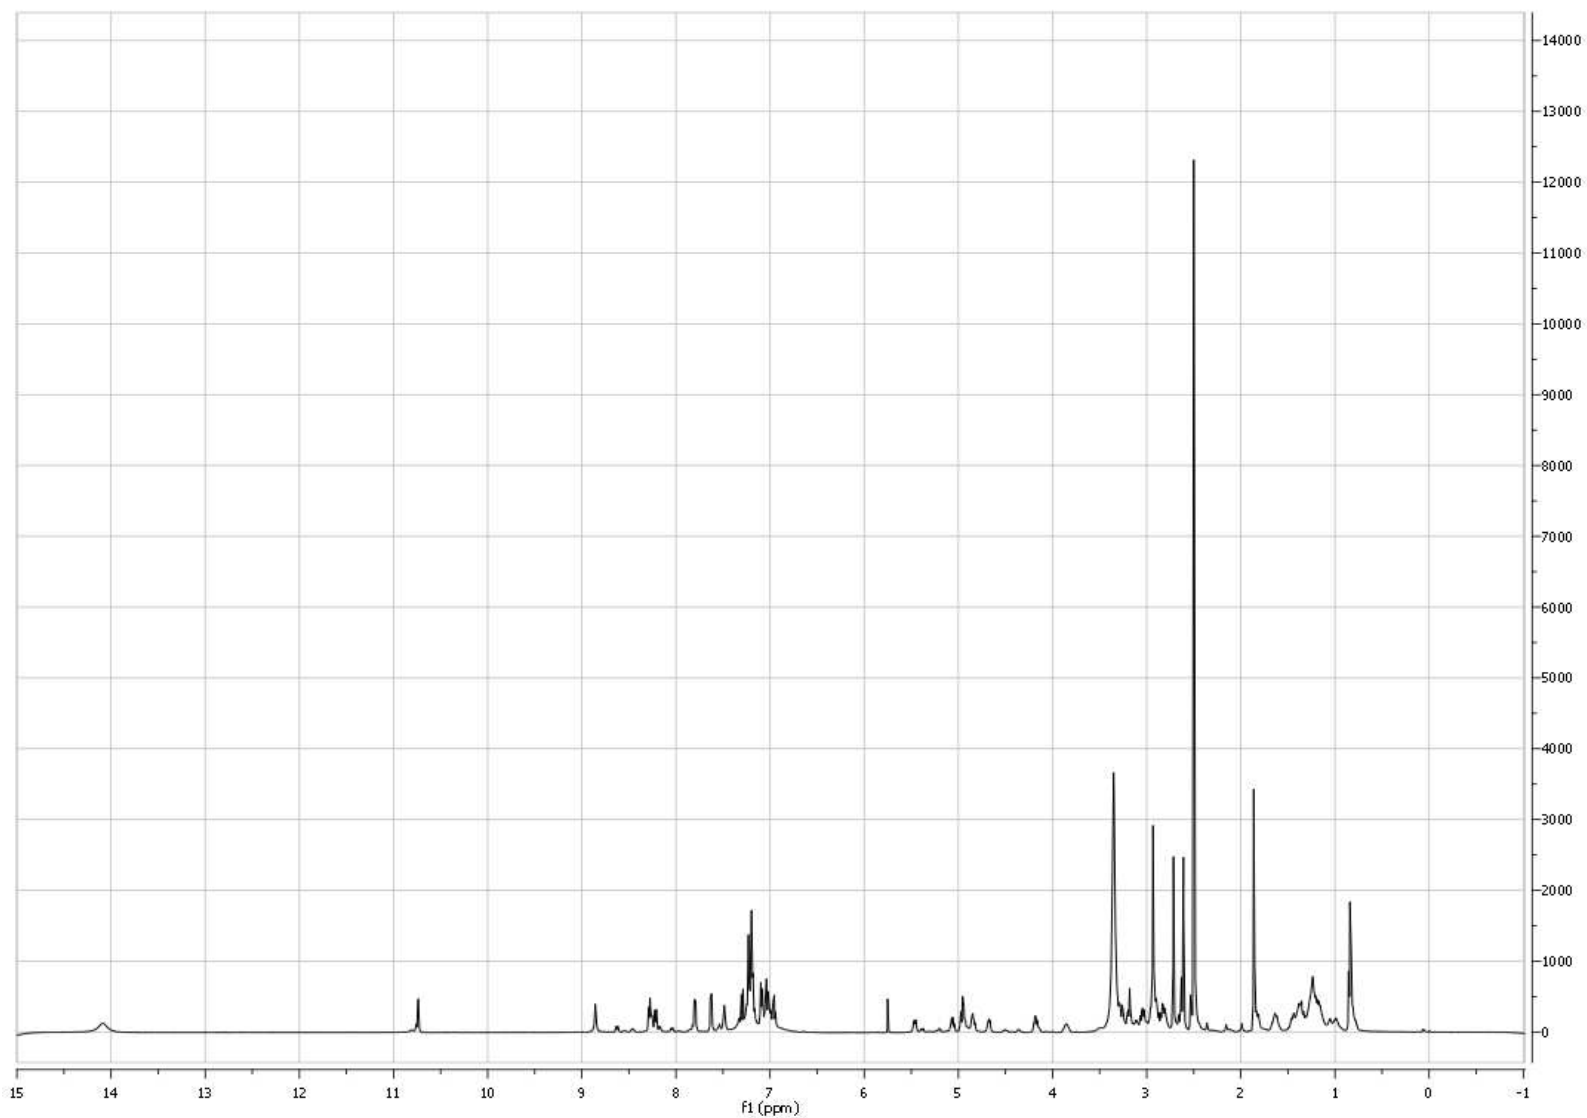

**Figure 21B:**  $^1\text{H-NMR}$  spectrum of compound 21.

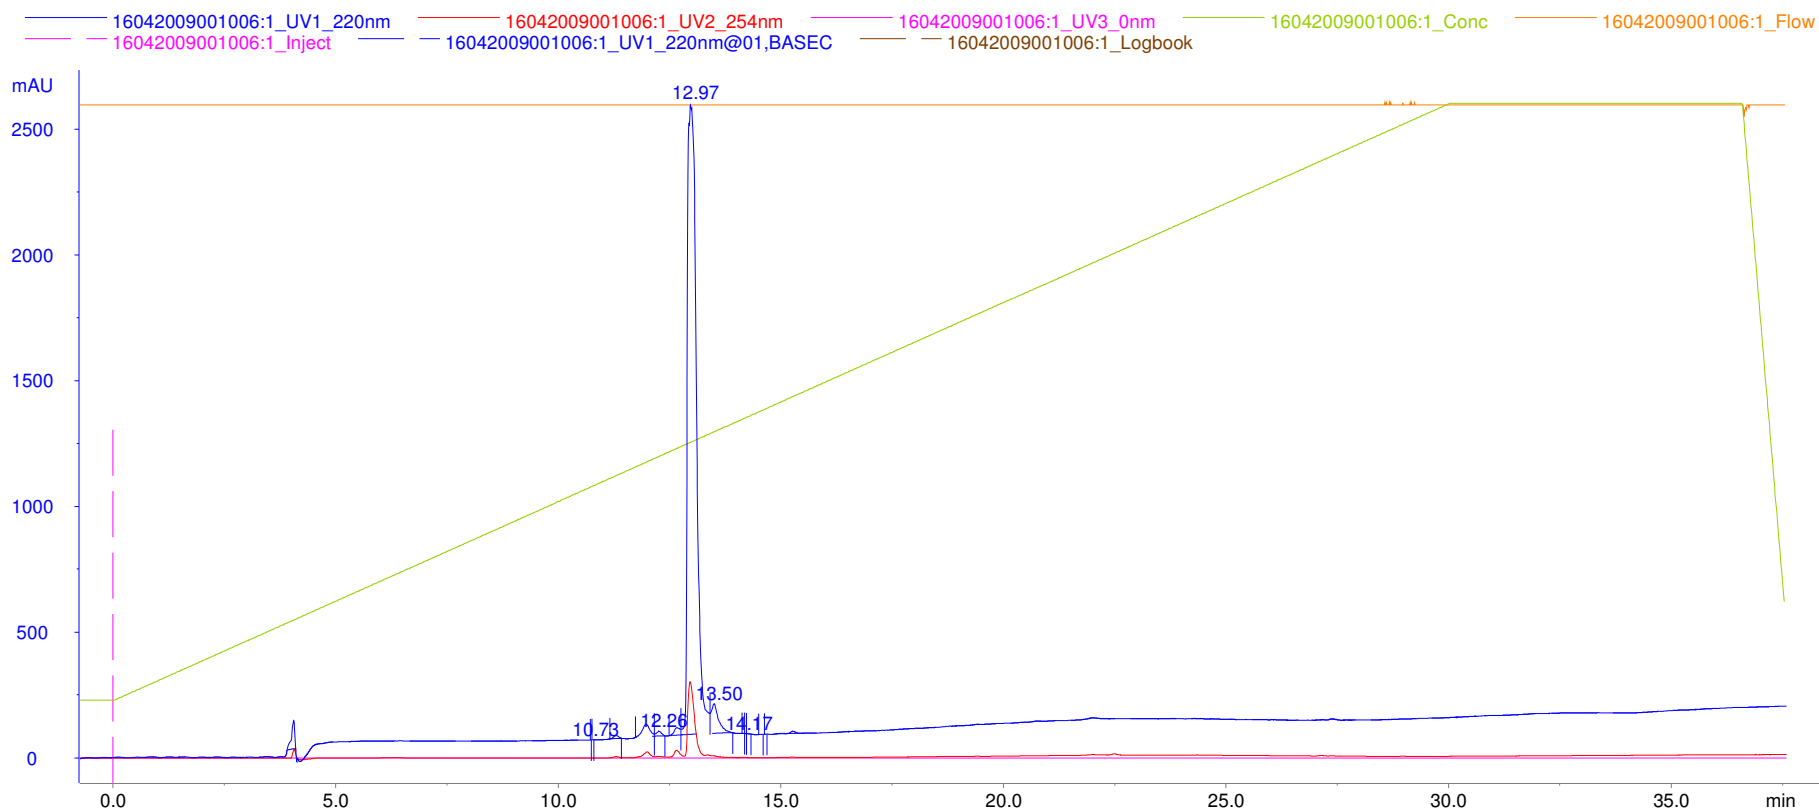

**Figure 22A:** HPLC chromatogram of compound 22.

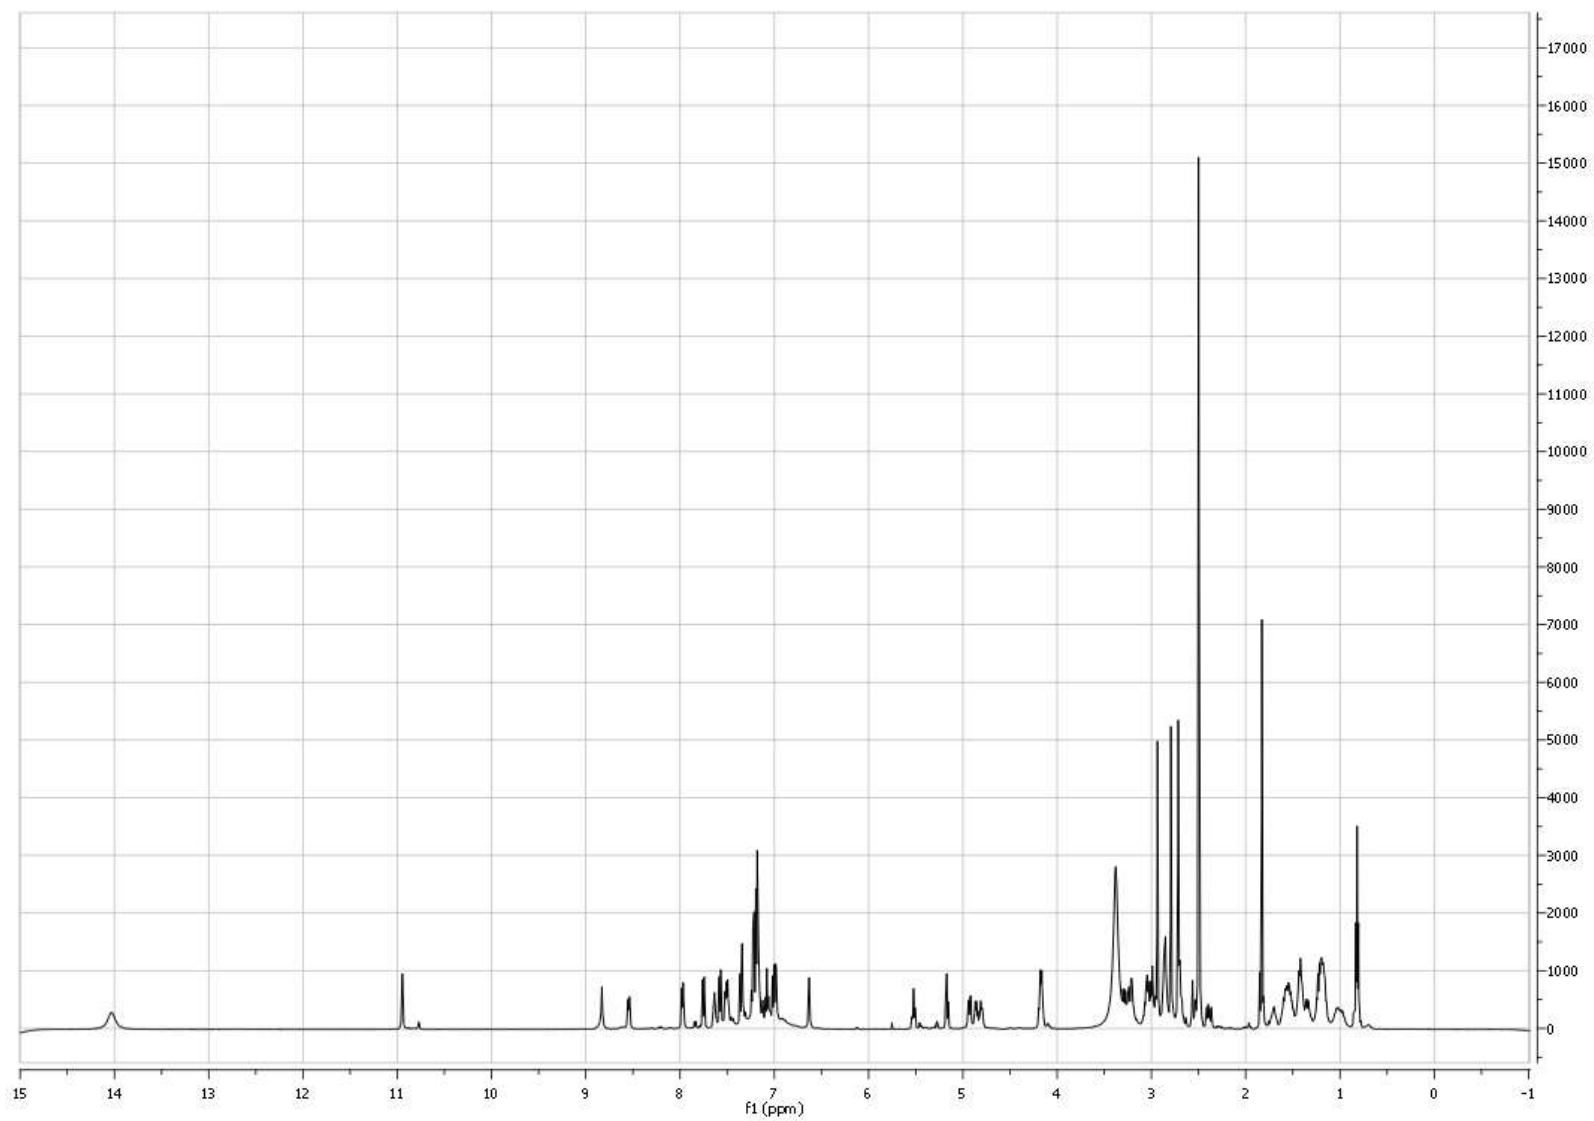

**Figure 22B:**  $^1\text{H-NMR}$  spectrum of compound 22.

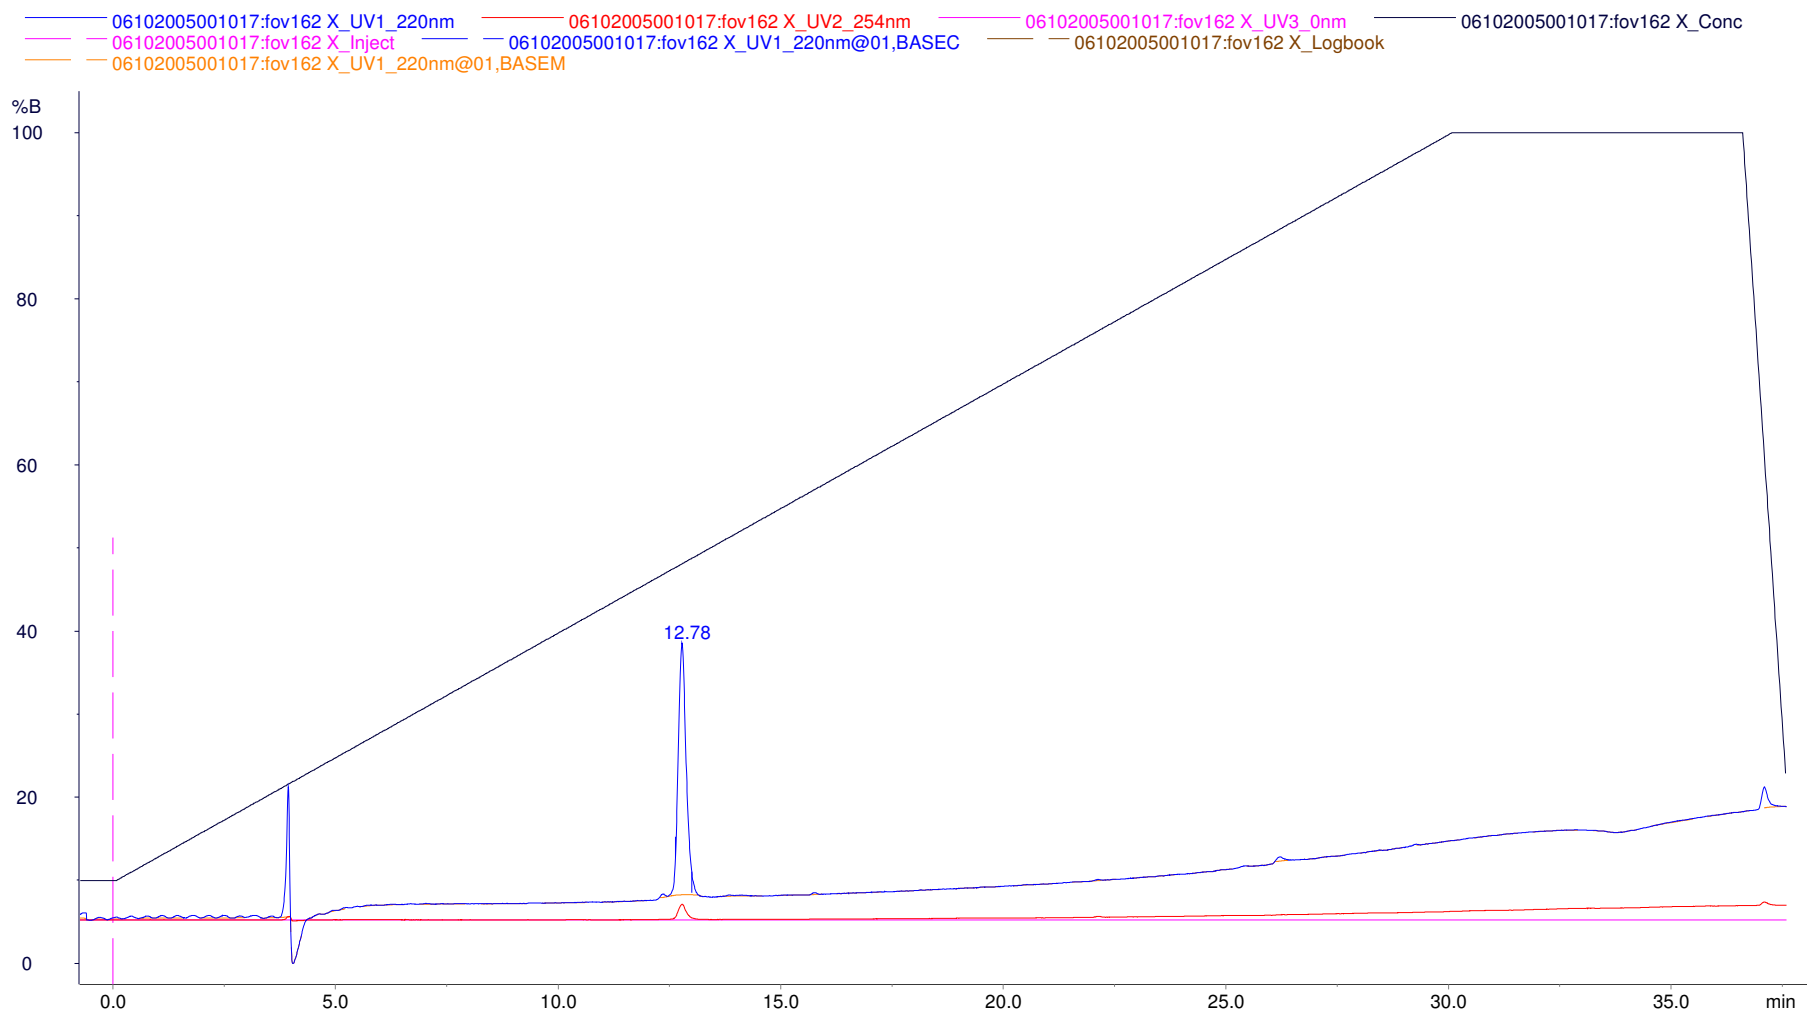

Figure 23A: HPLC chromatogram of compound 23.

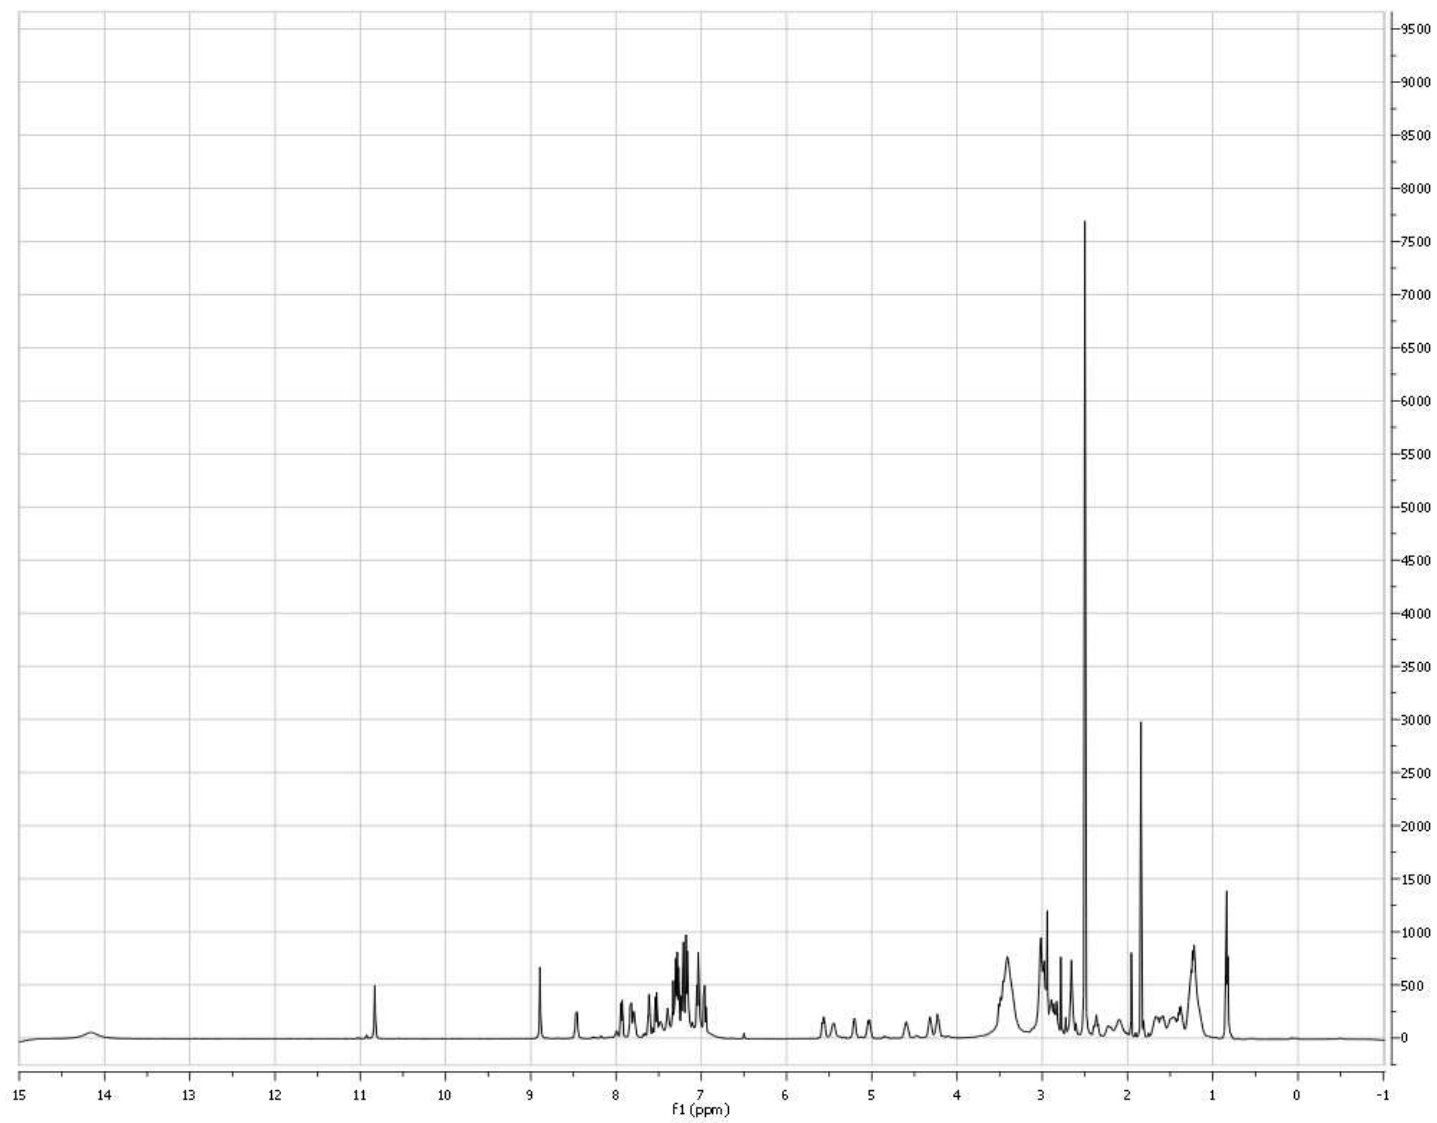

**Figure 23B:**  $^1\text{H-NMR}$  spectrum of compound 23.



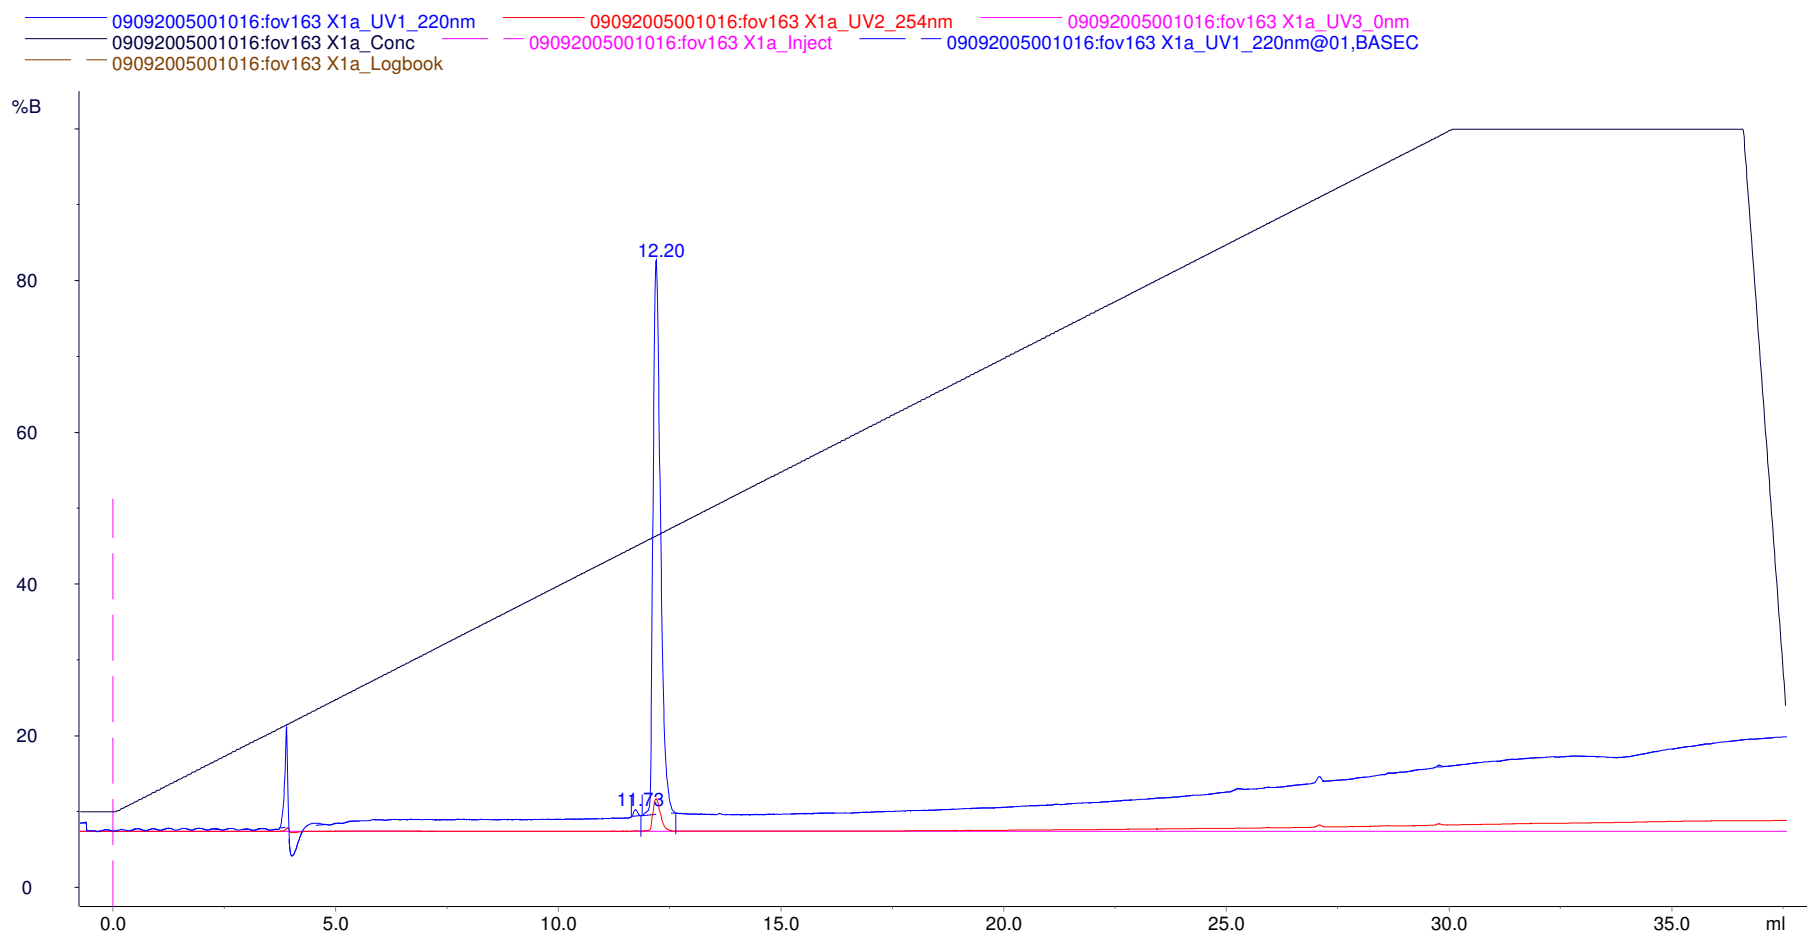

Figure 24A: HPLC chromatogram of compound 24.

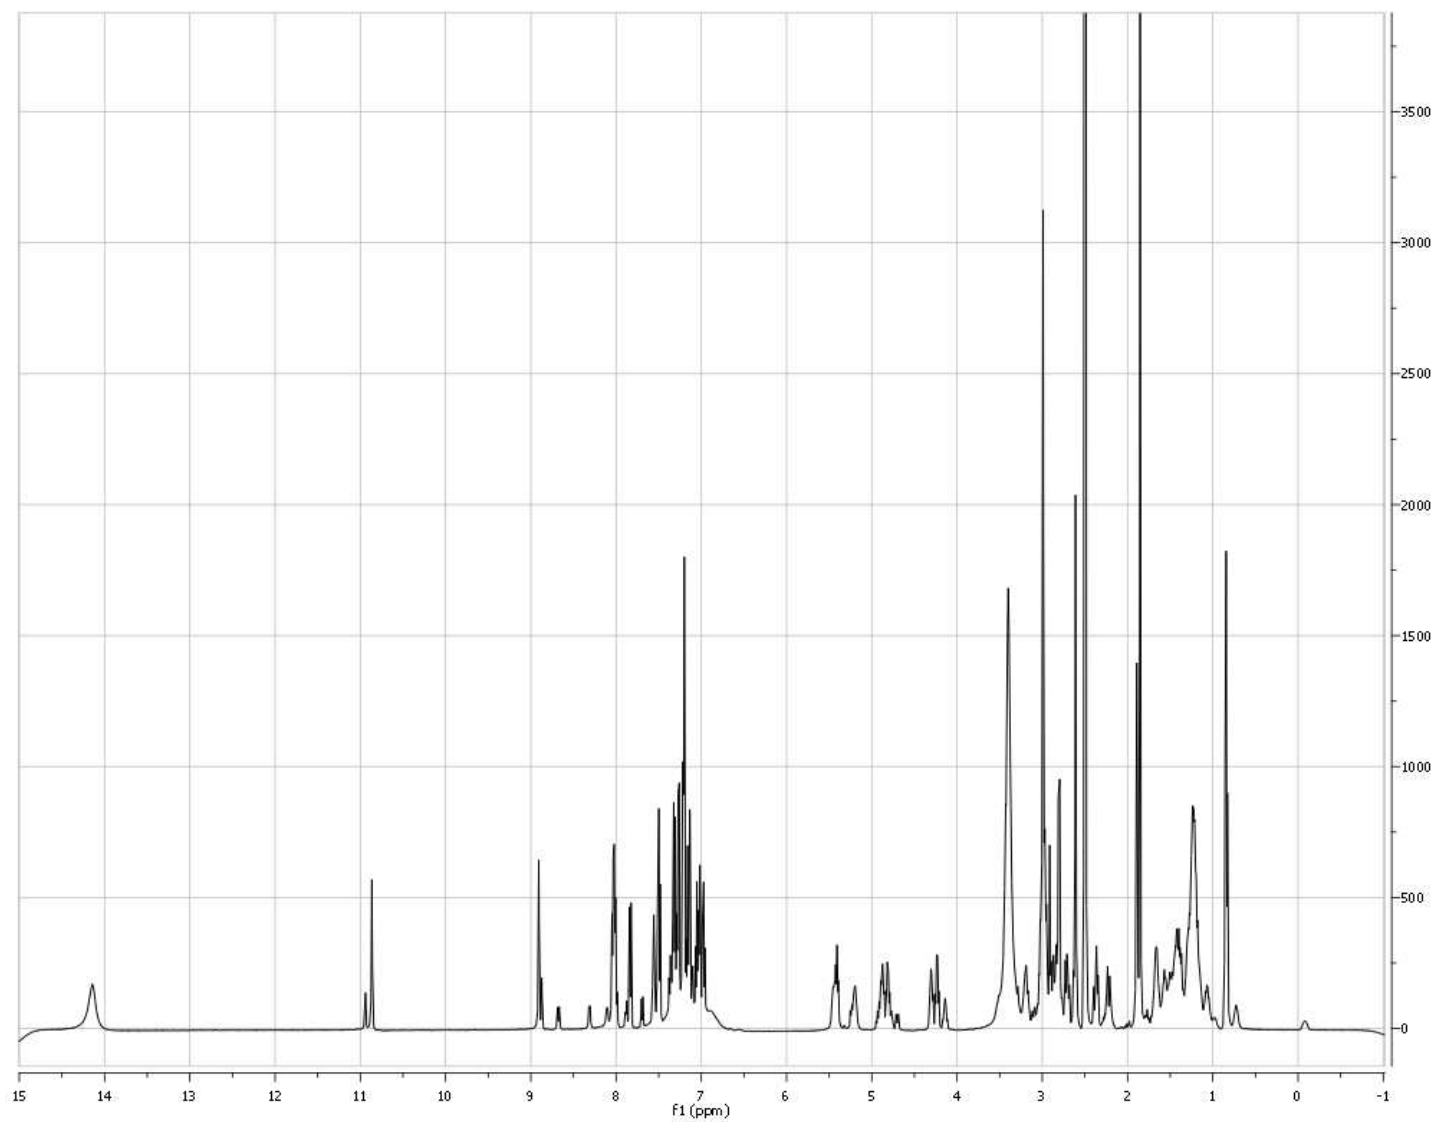

**Figure 24B:**  $^1\text{H-NMR}$  spectrum of compound 24.

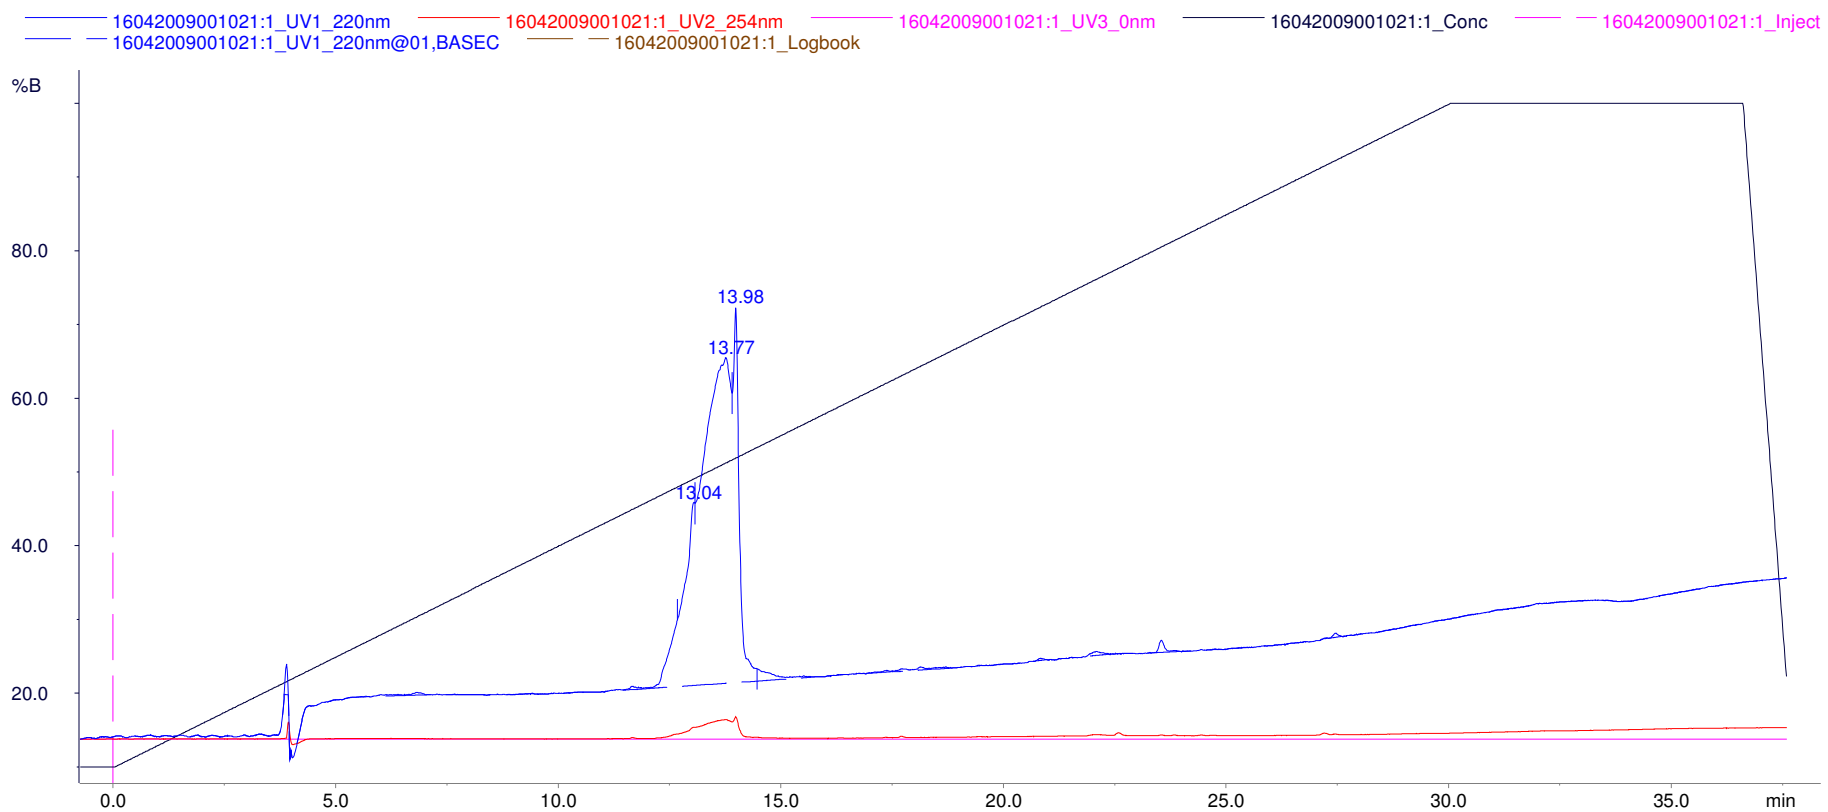

Figure 25A: HPLC chromatogram of compound 25.

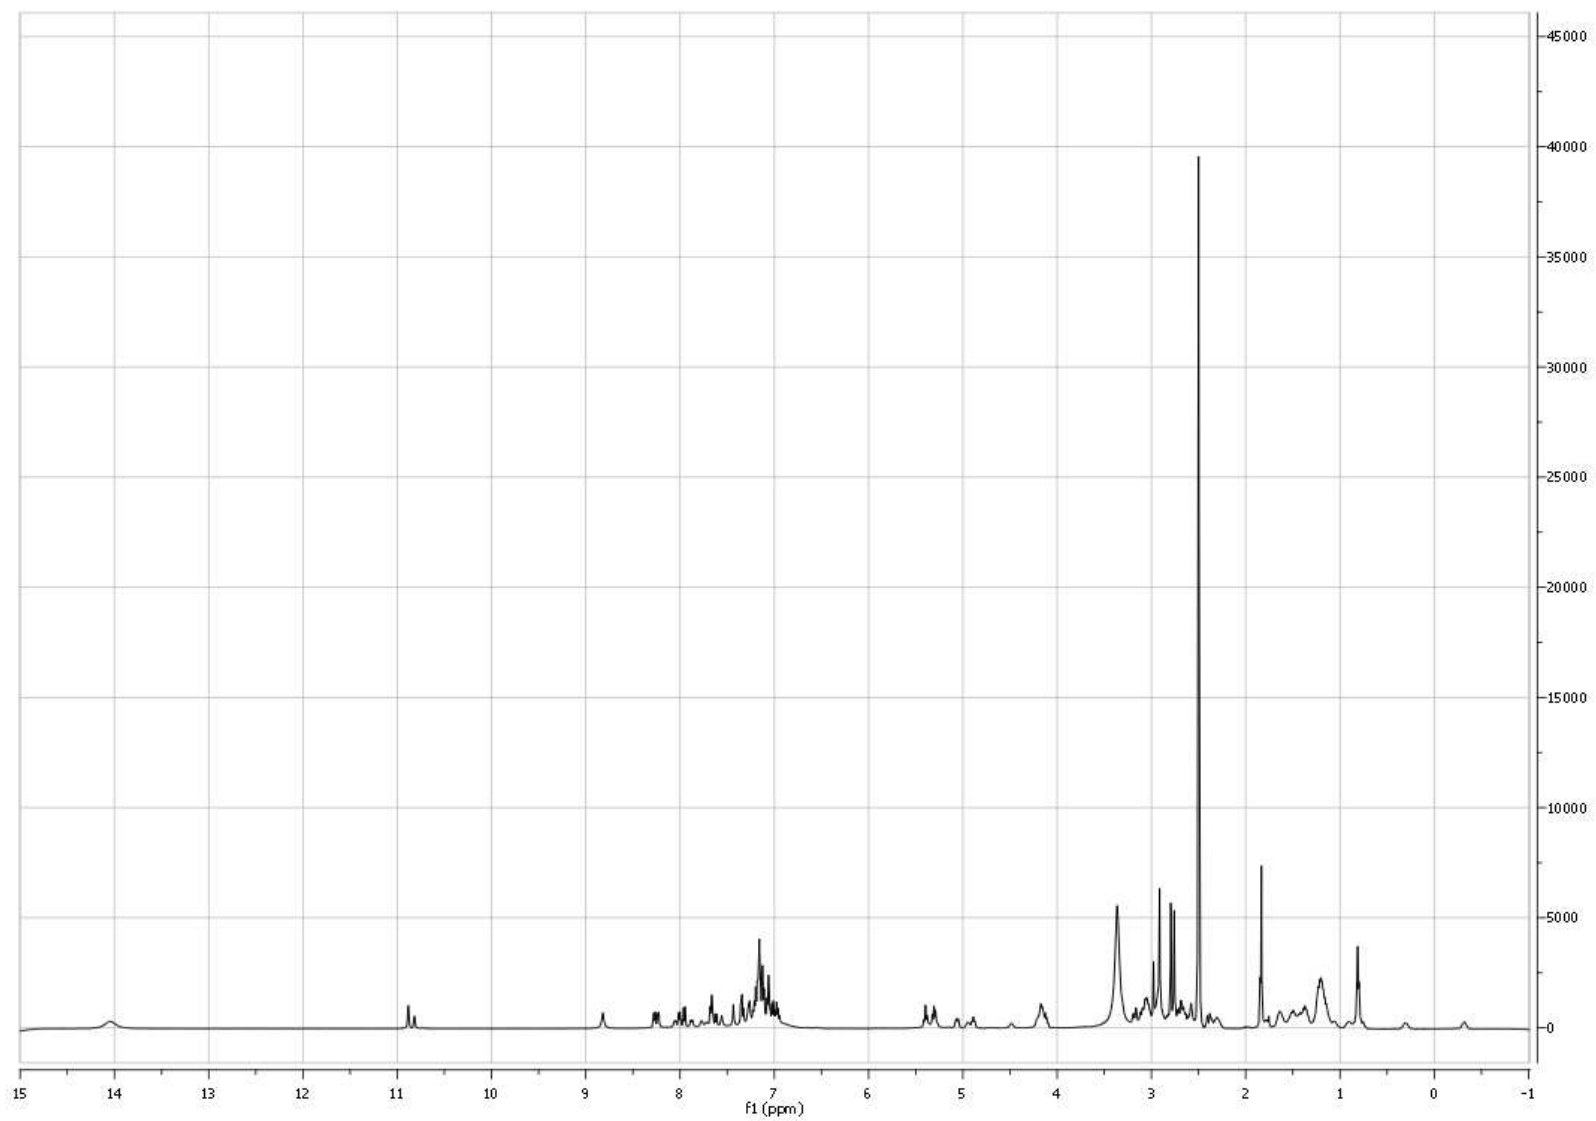

**Figure 25B:**  $^1\text{H-NMR}$  spectrum of compound 25.

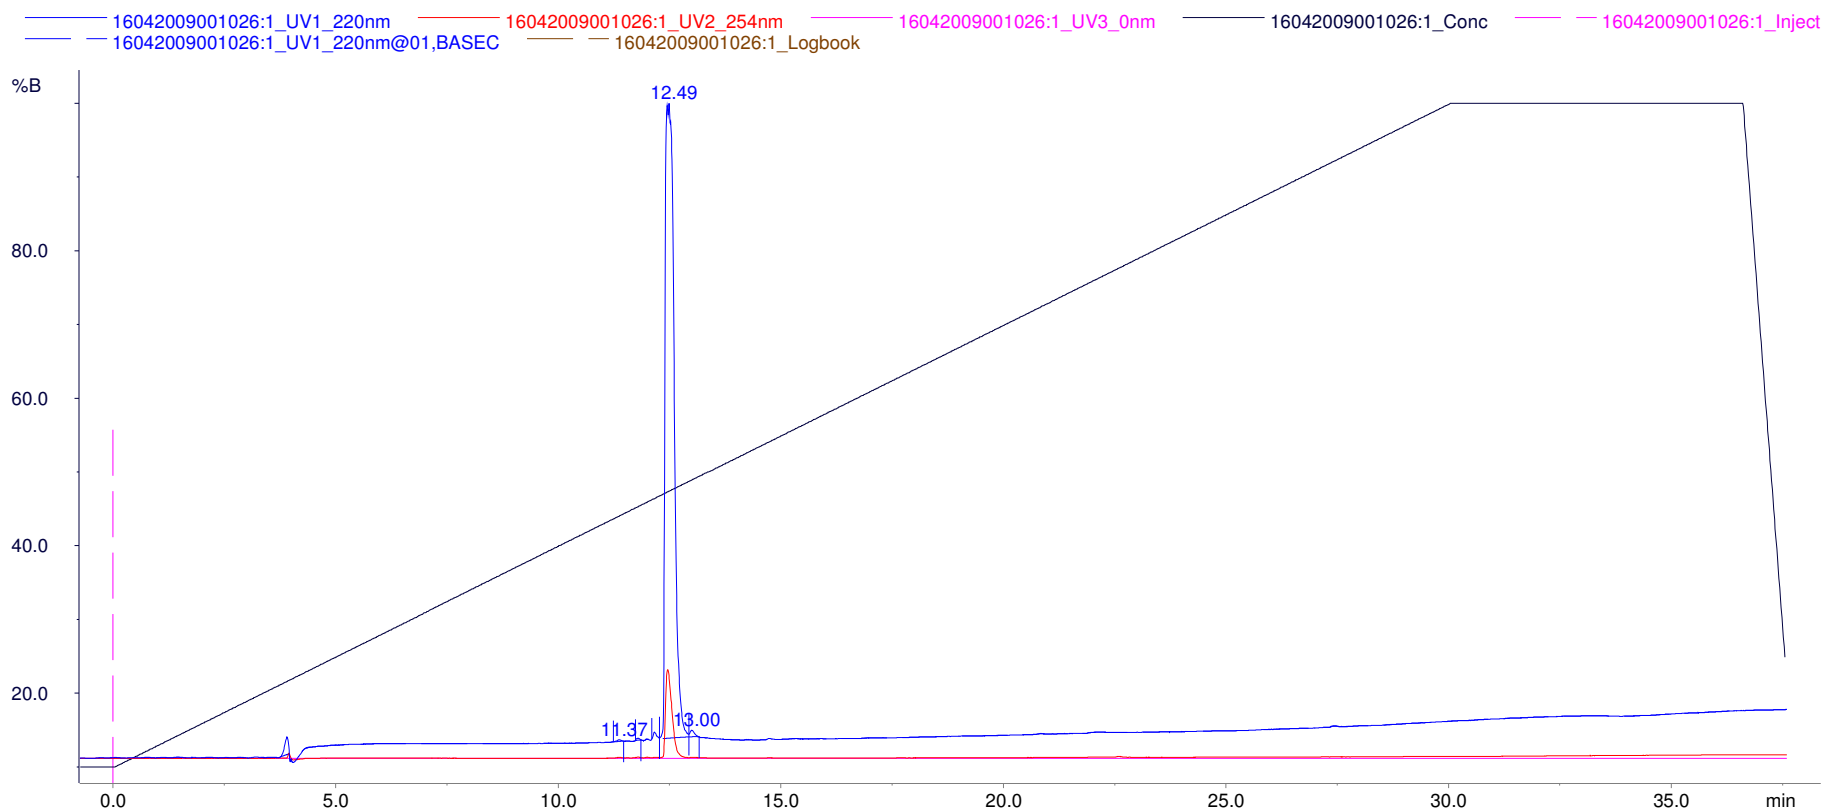

**Figure 26A:** HPLC chromatogram of compound 26.

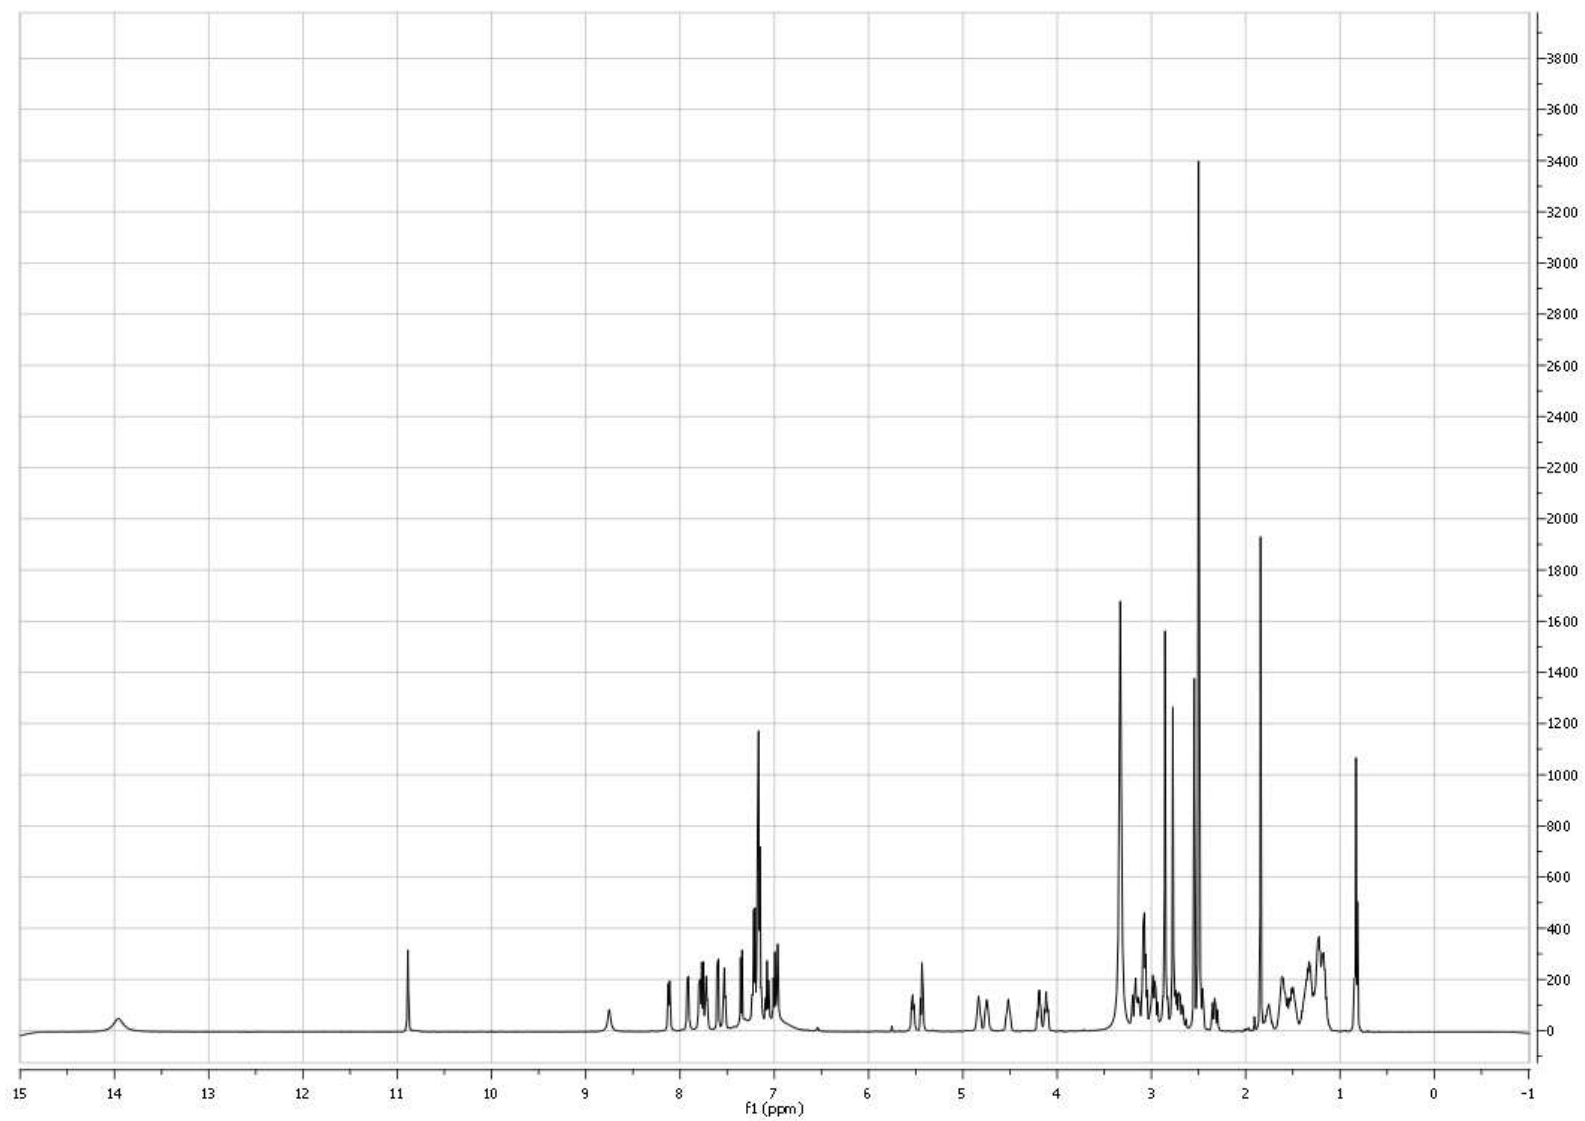

**Figure 26B:**  $^1\text{H-NMR}$  spectrum of compound 26.

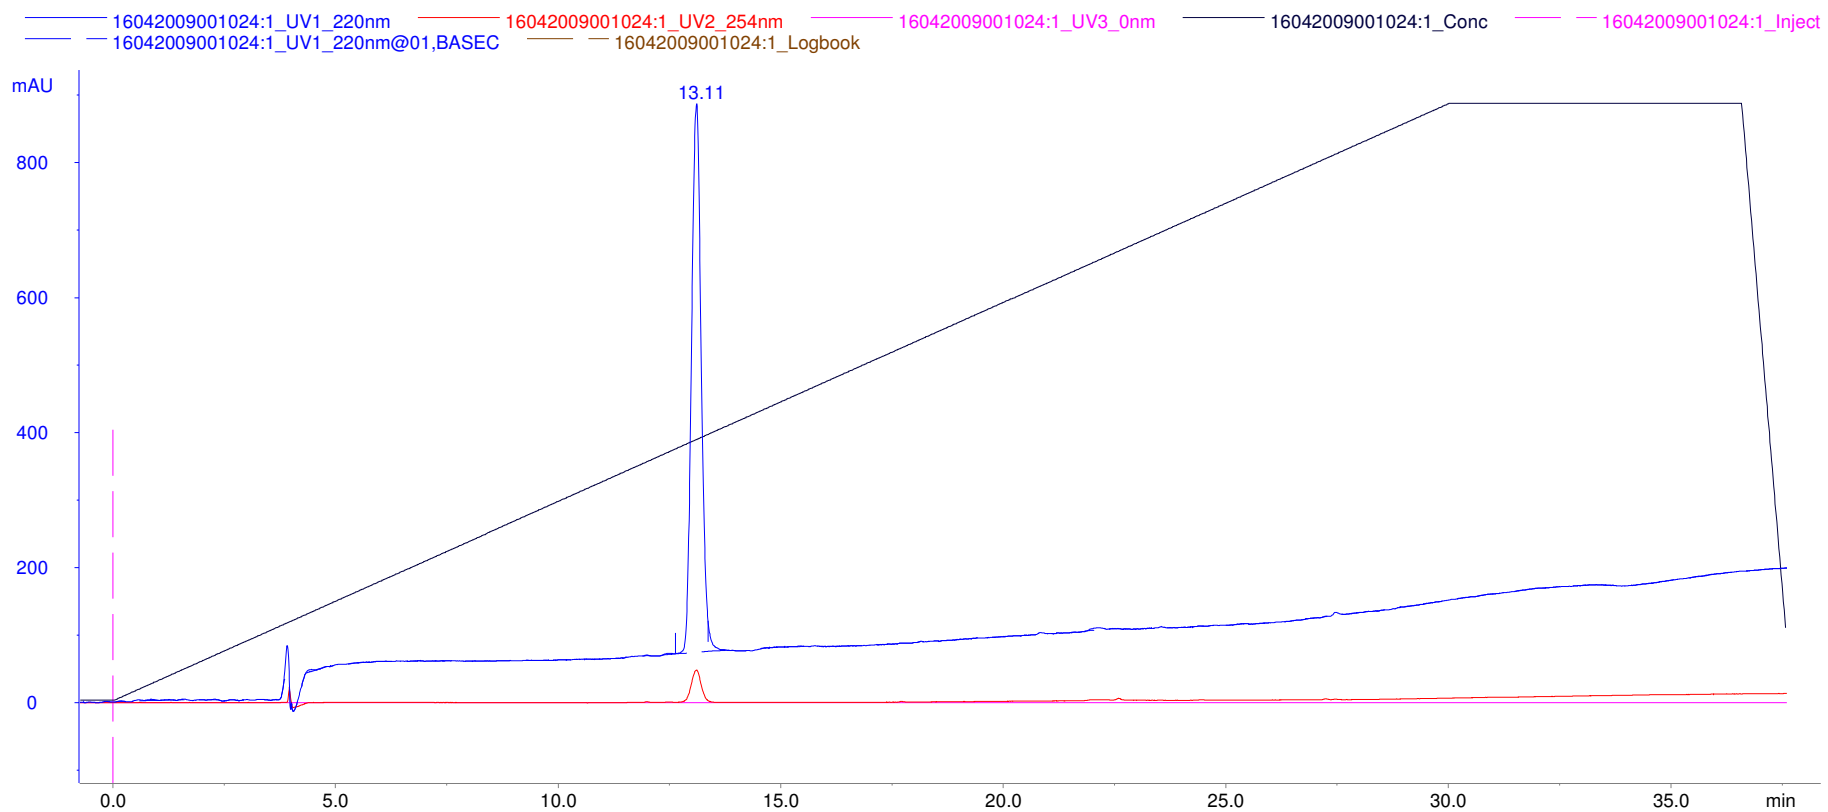

**Figure 27A:** HPLC chromatogram of compound 27.

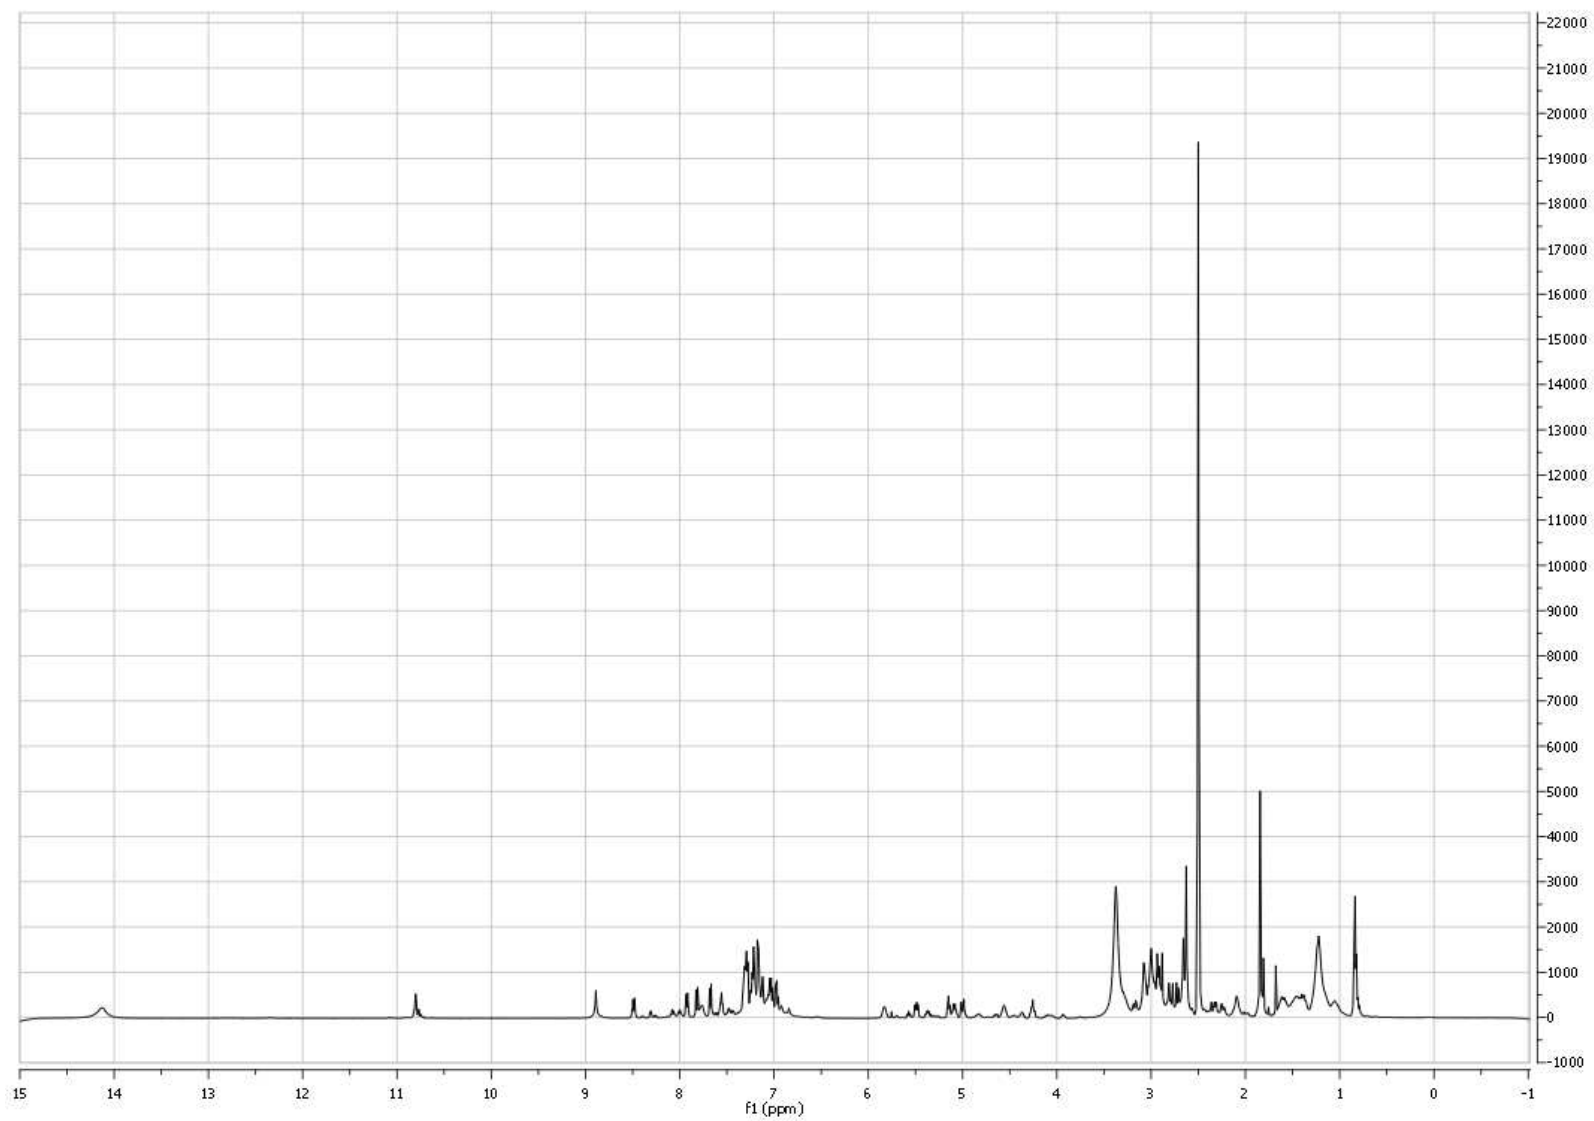

**Figure 27B:** <sup>1</sup>H-NMR spectrum of compound 27.



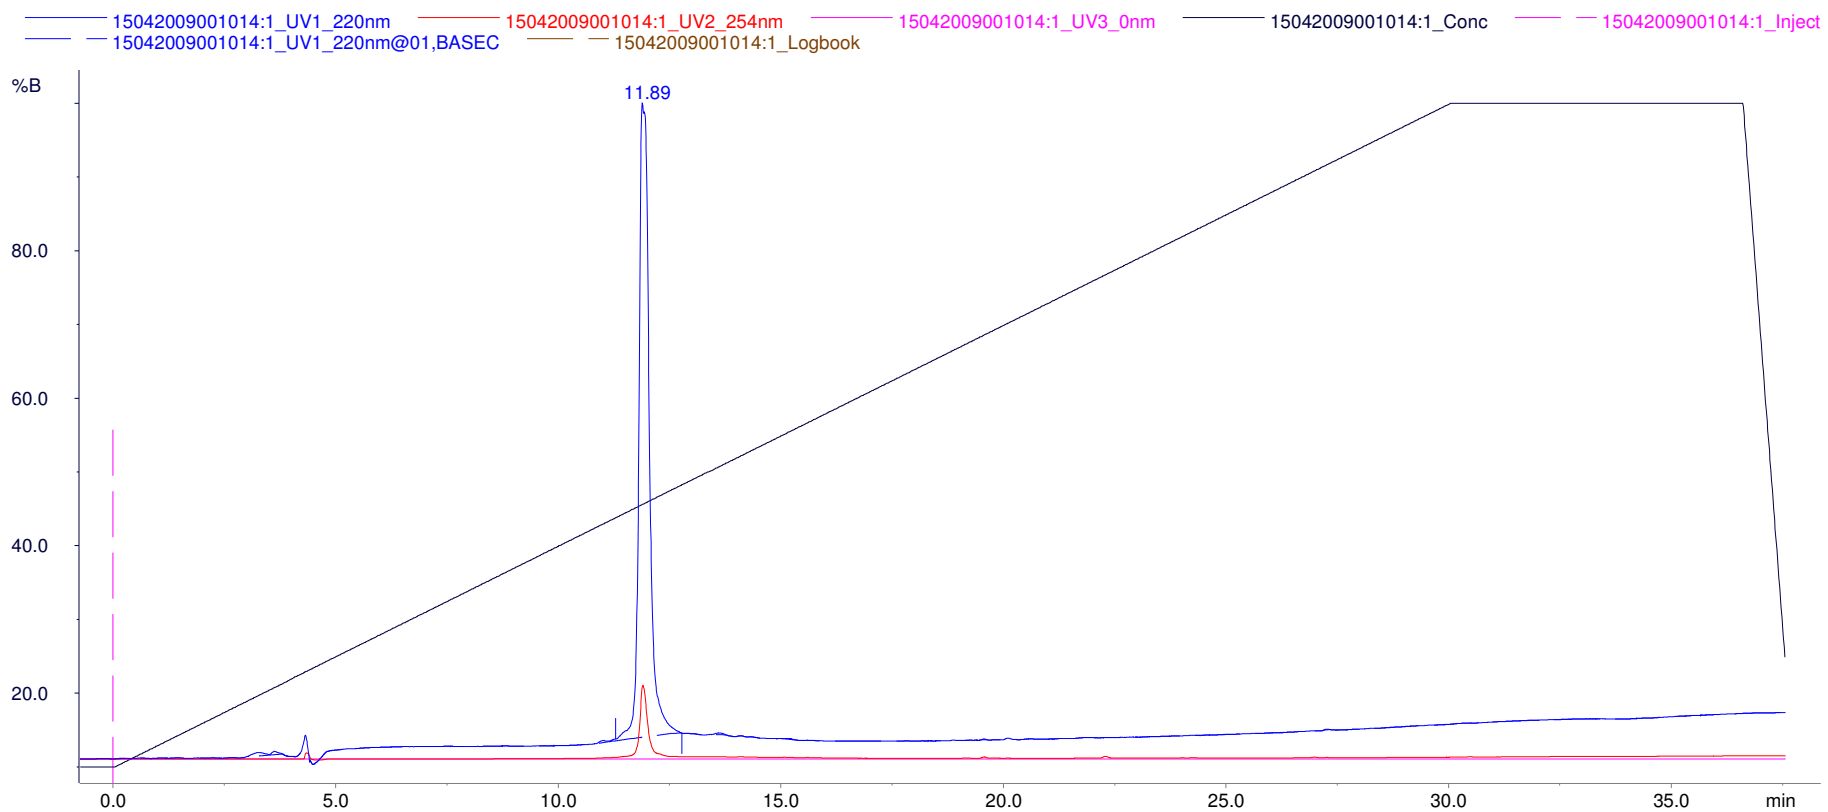

**Figure 28A:** HPLC chromatogram of compound 28.

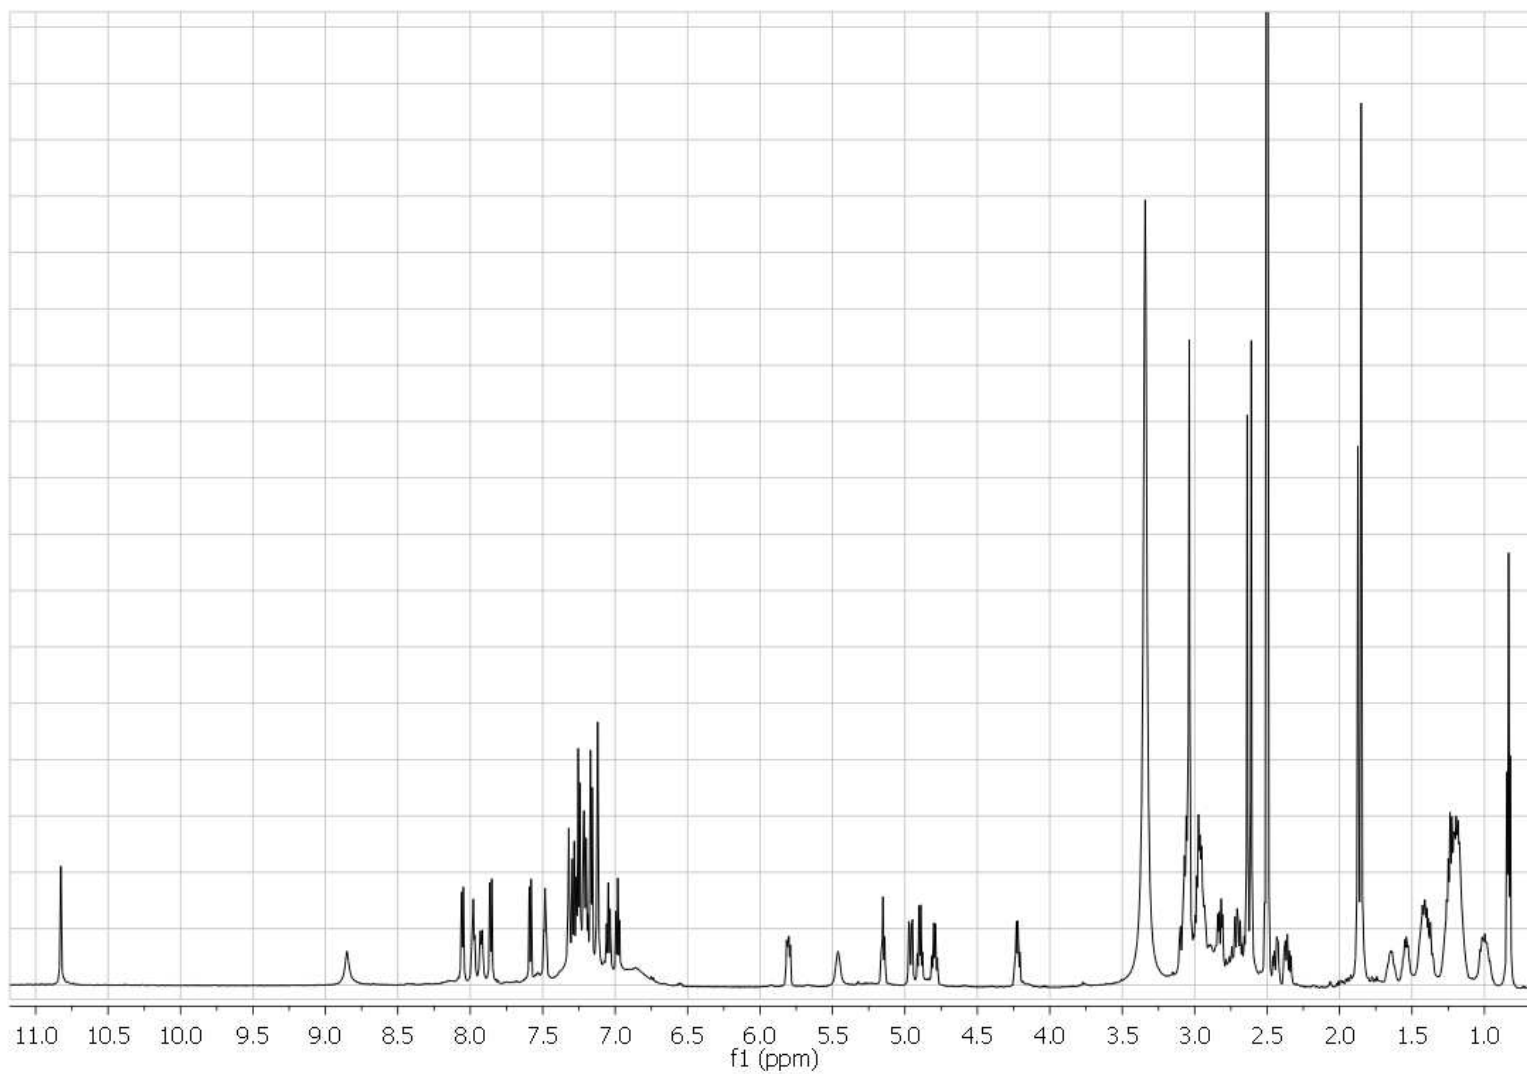

**Figure 28B:** <sup>1</sup>H-NMR spectrum of compound 28.

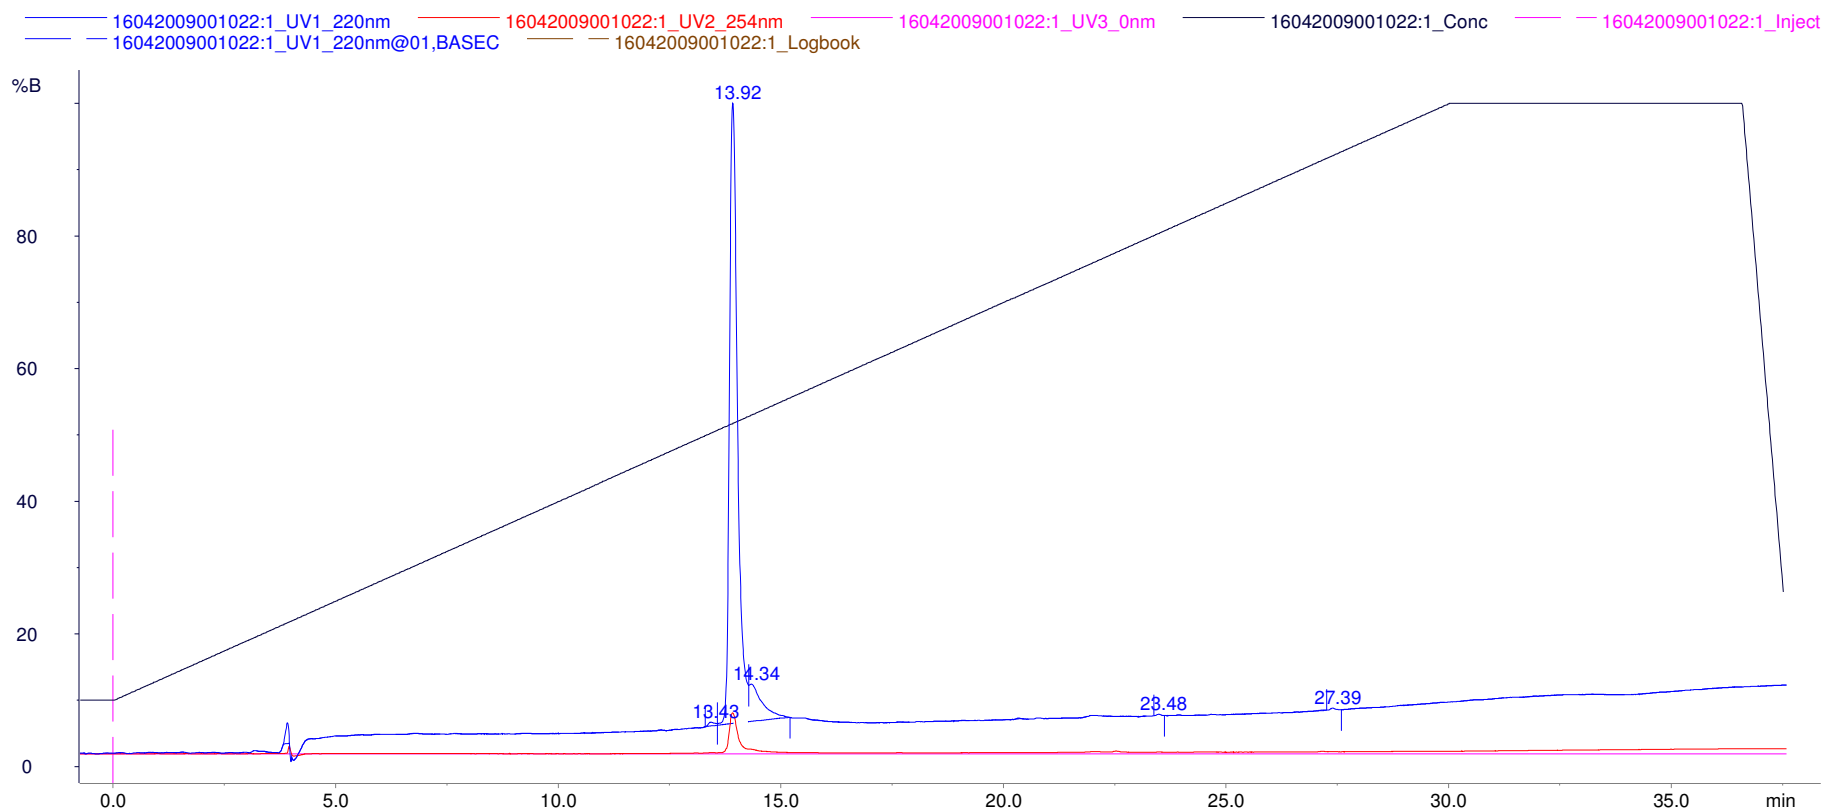

**Figure 29A:** HPLC chromatogram of compound 29.

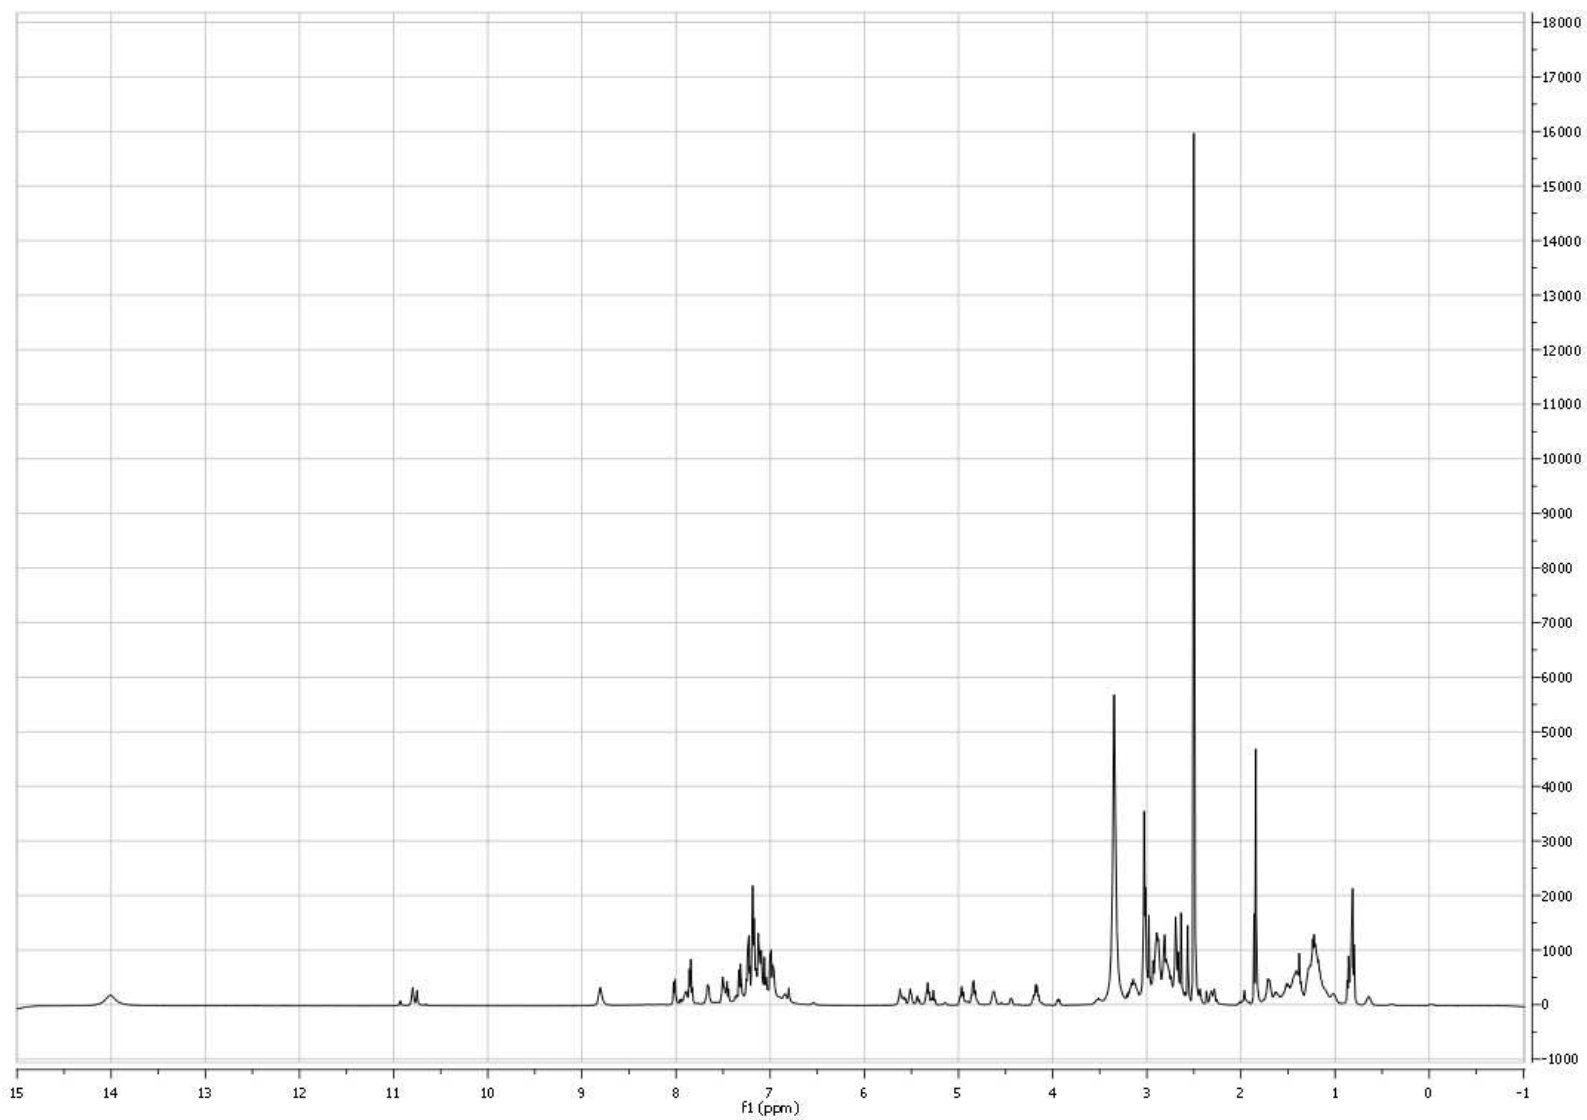

**Figure 29B:** <sup>1</sup>H-NMR spectrum of compound 29.

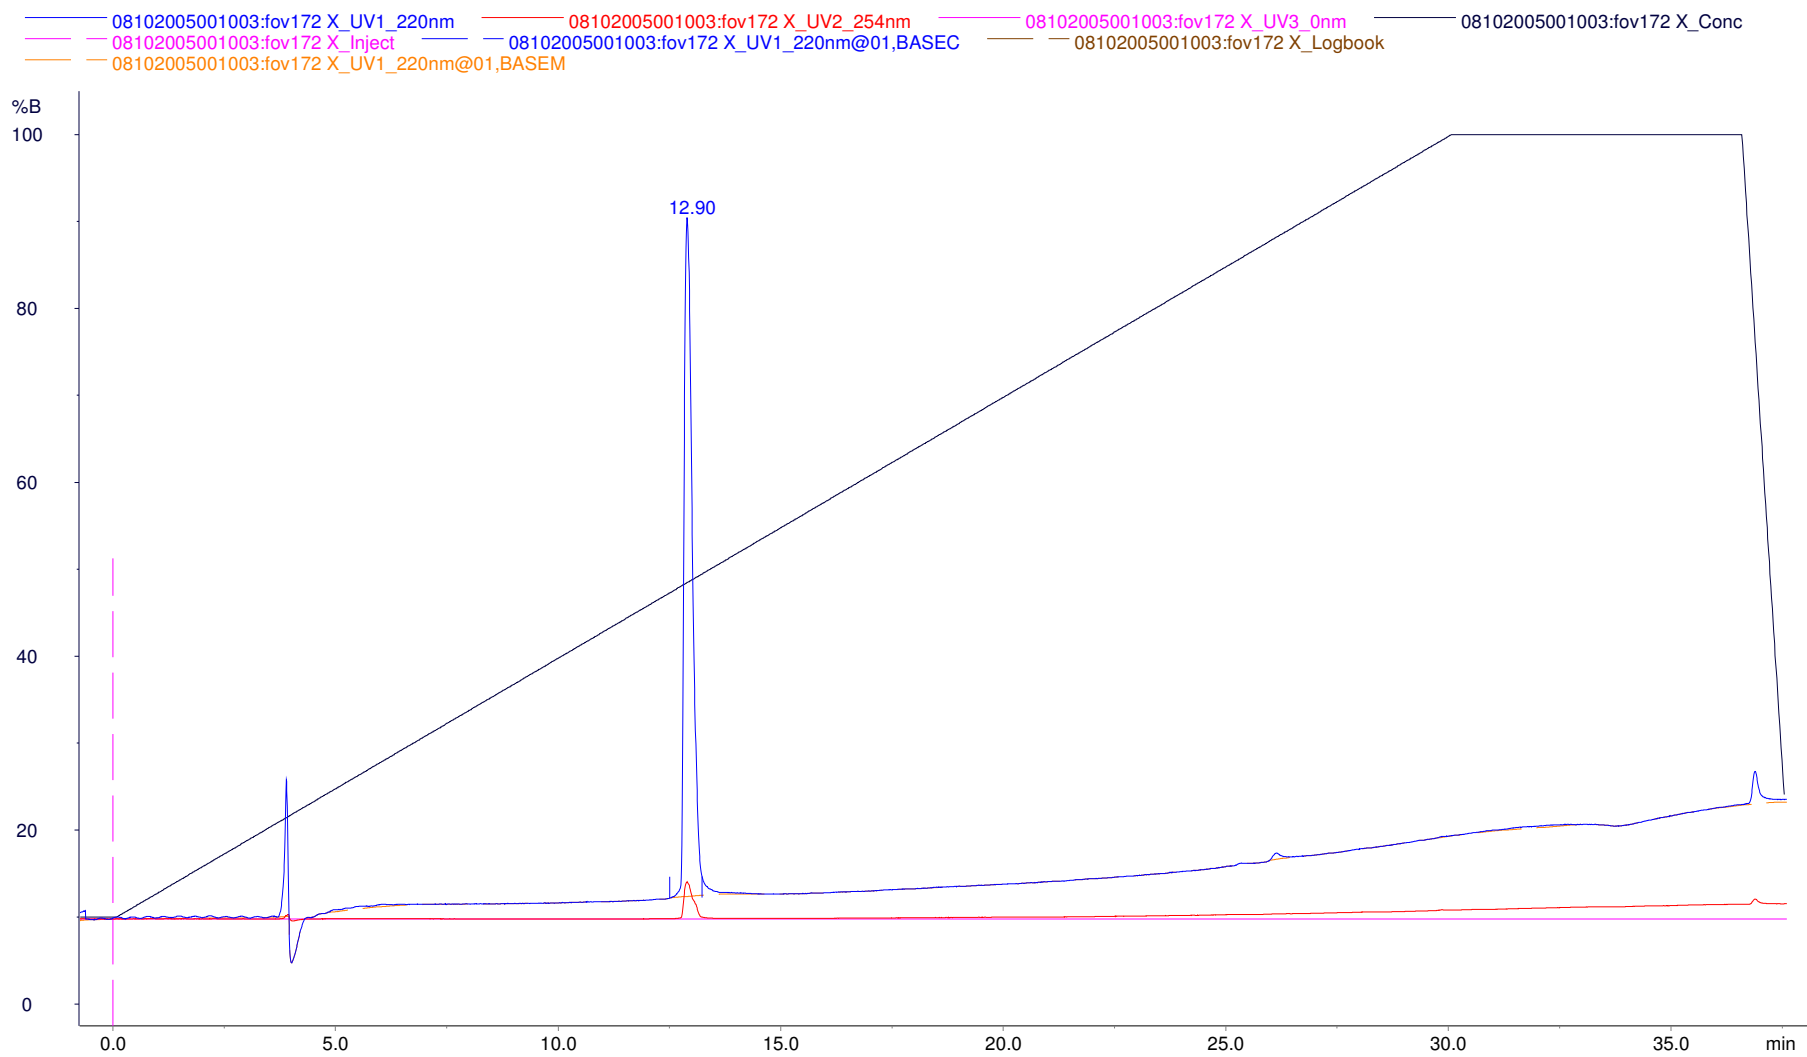

**Figure 30A:** HPLC chromatogram of compound 30.

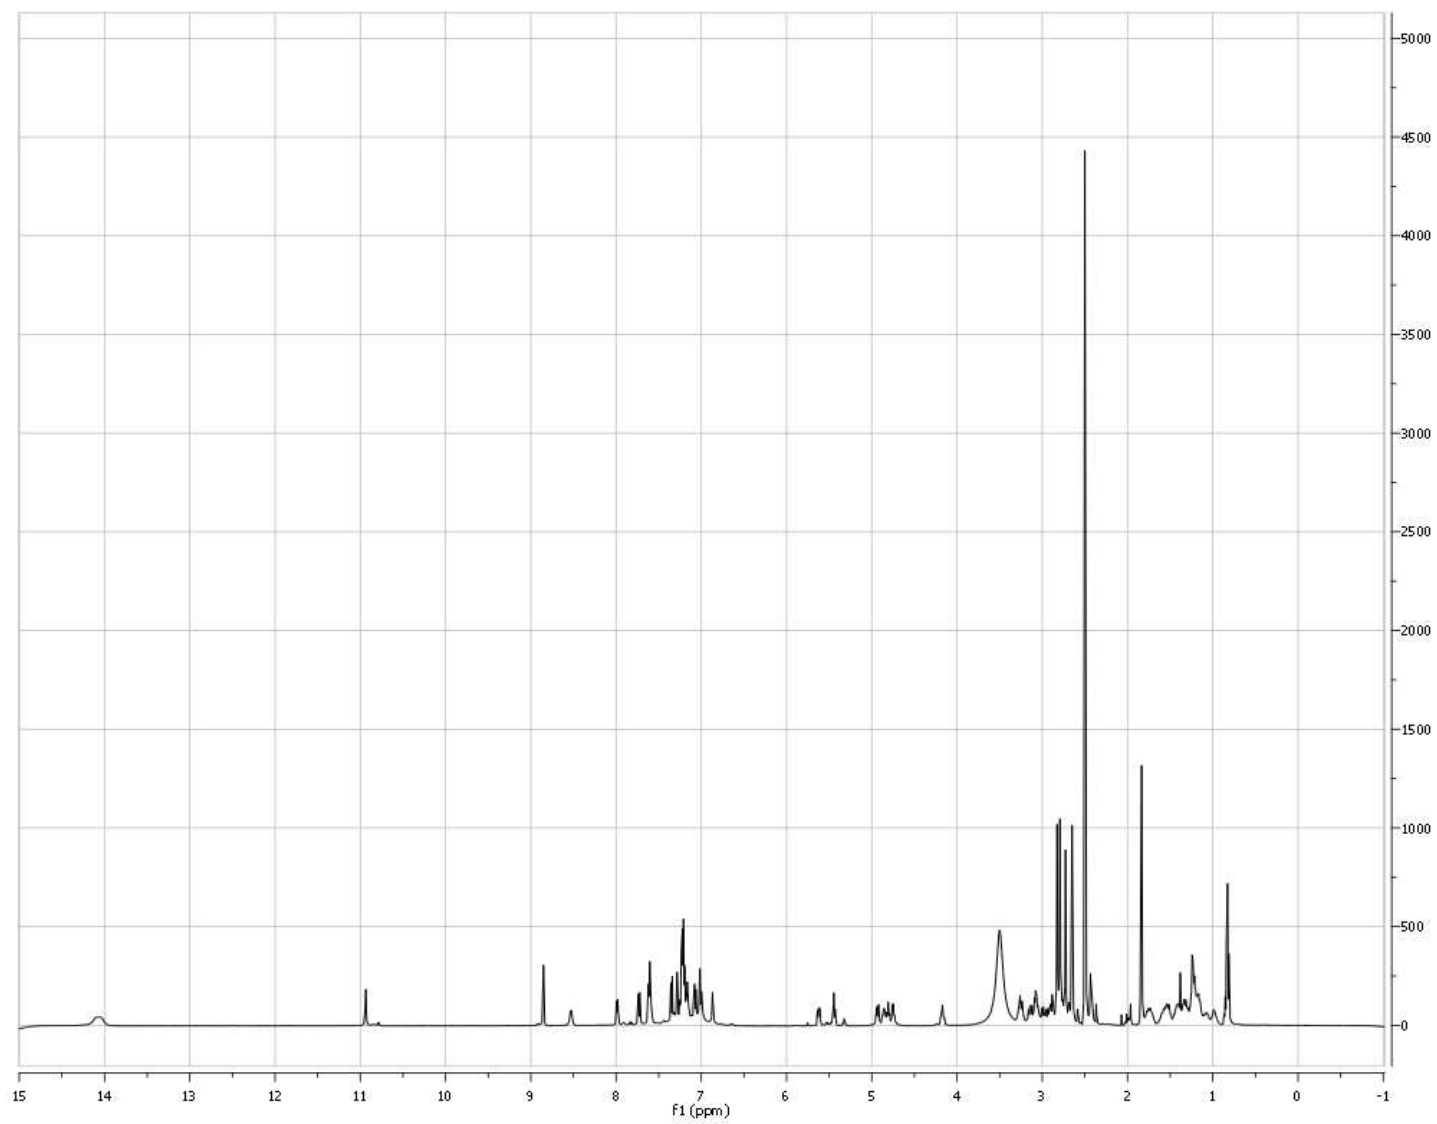

**Figure 30B:**  $^1\text{H-NMR}$  spectrum of compound 30.

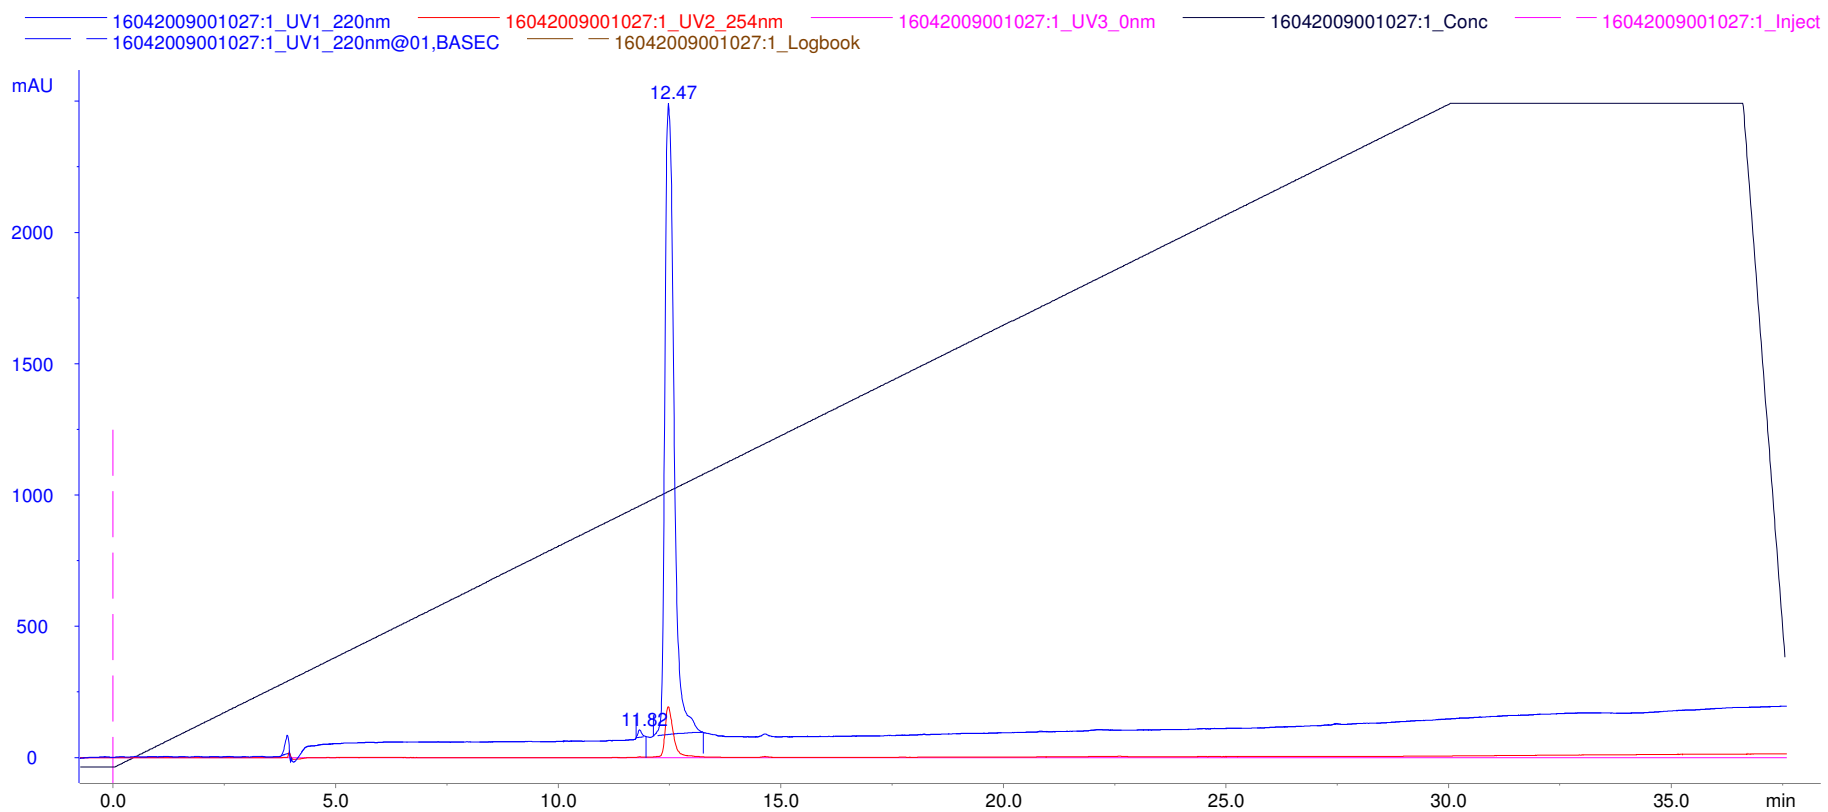

**Figure 31A:** HPLC chromatogram of compound 31.

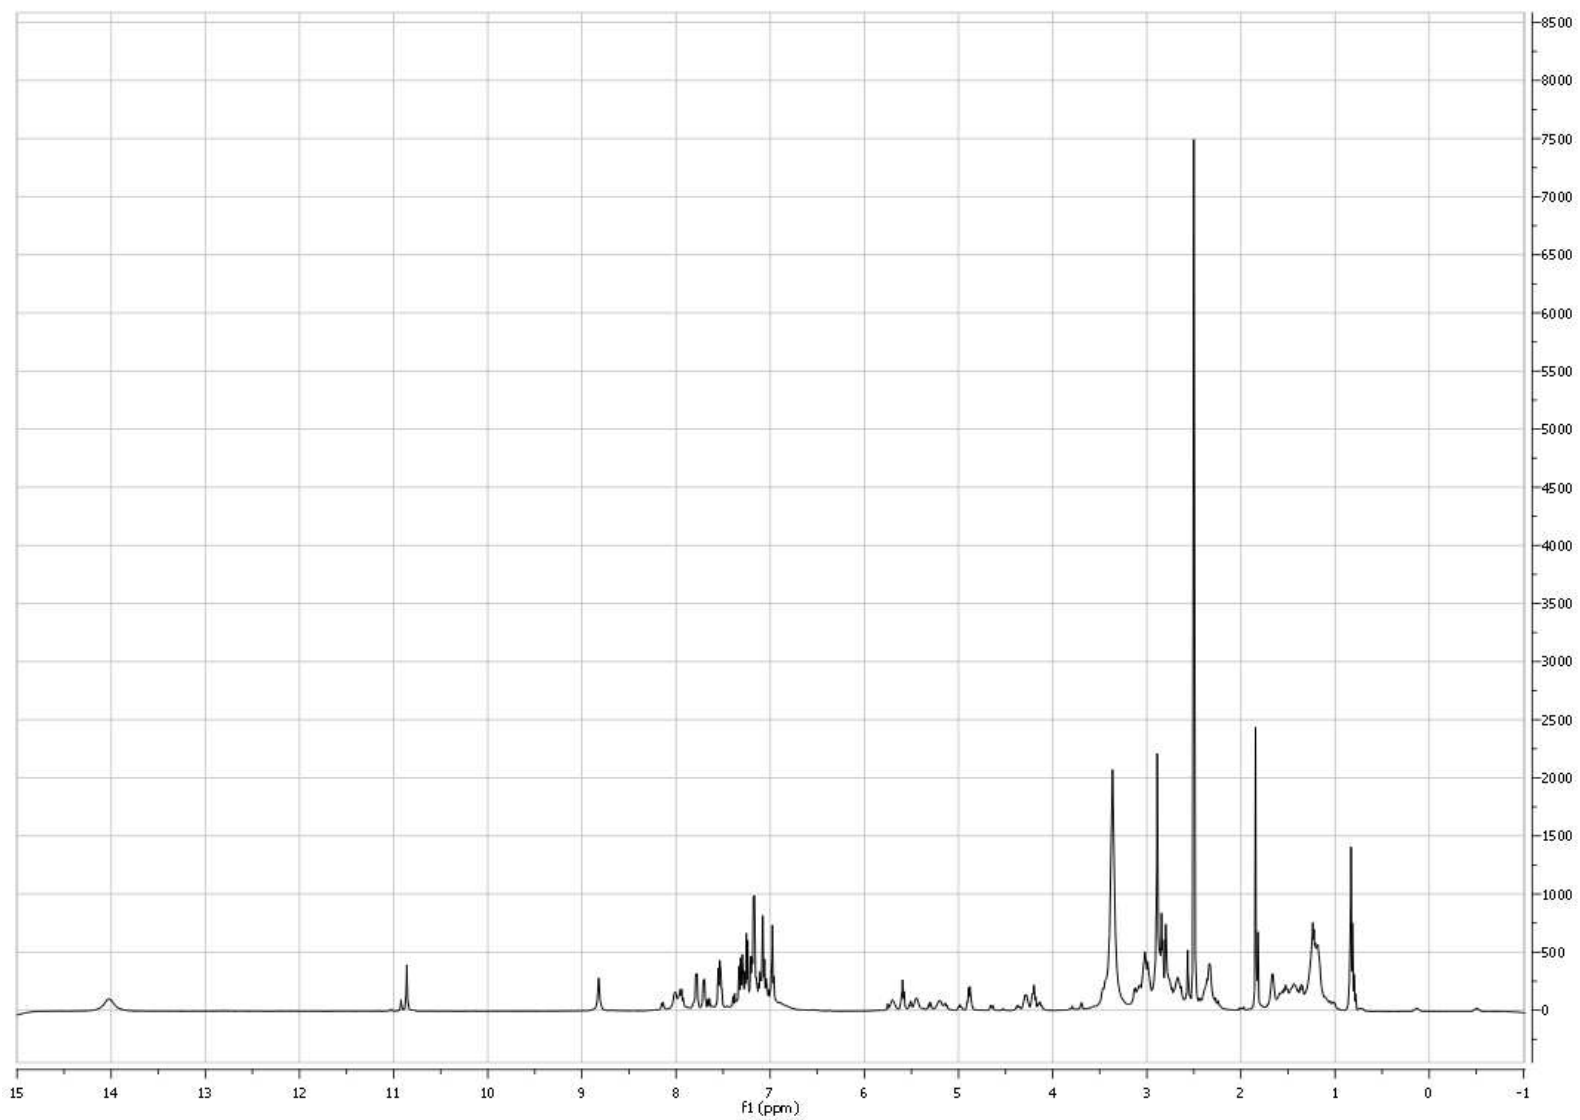

**Figure 31B:**  $^1\text{H}$ -NMR spectrum of compound 31.



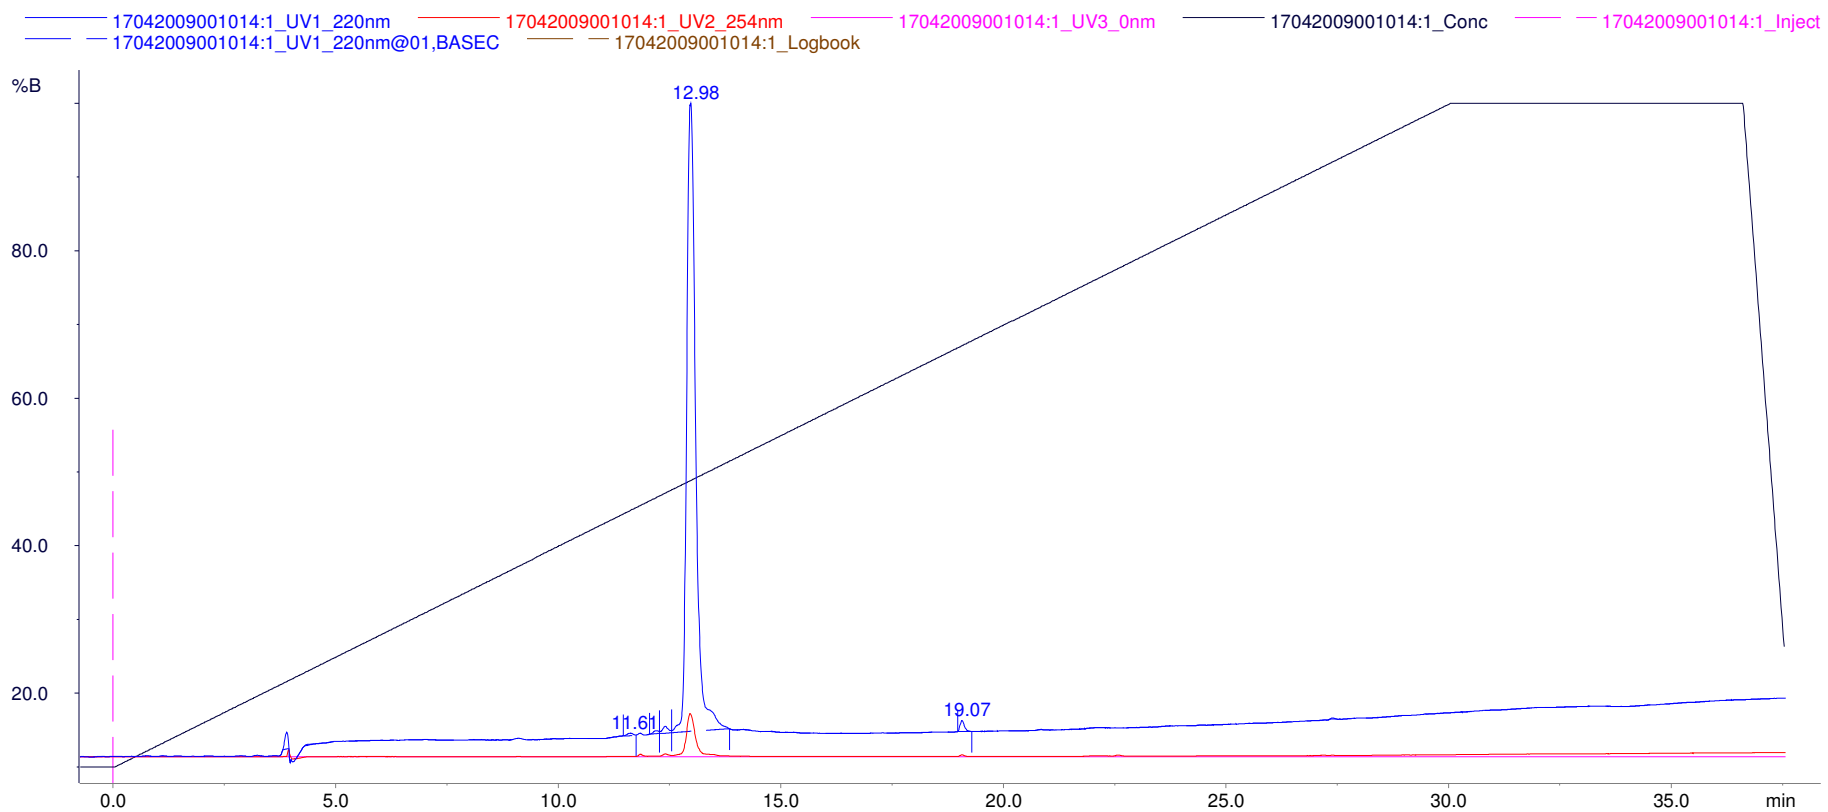

**Figure 32A:** HPLC chromatogram of compound 32.

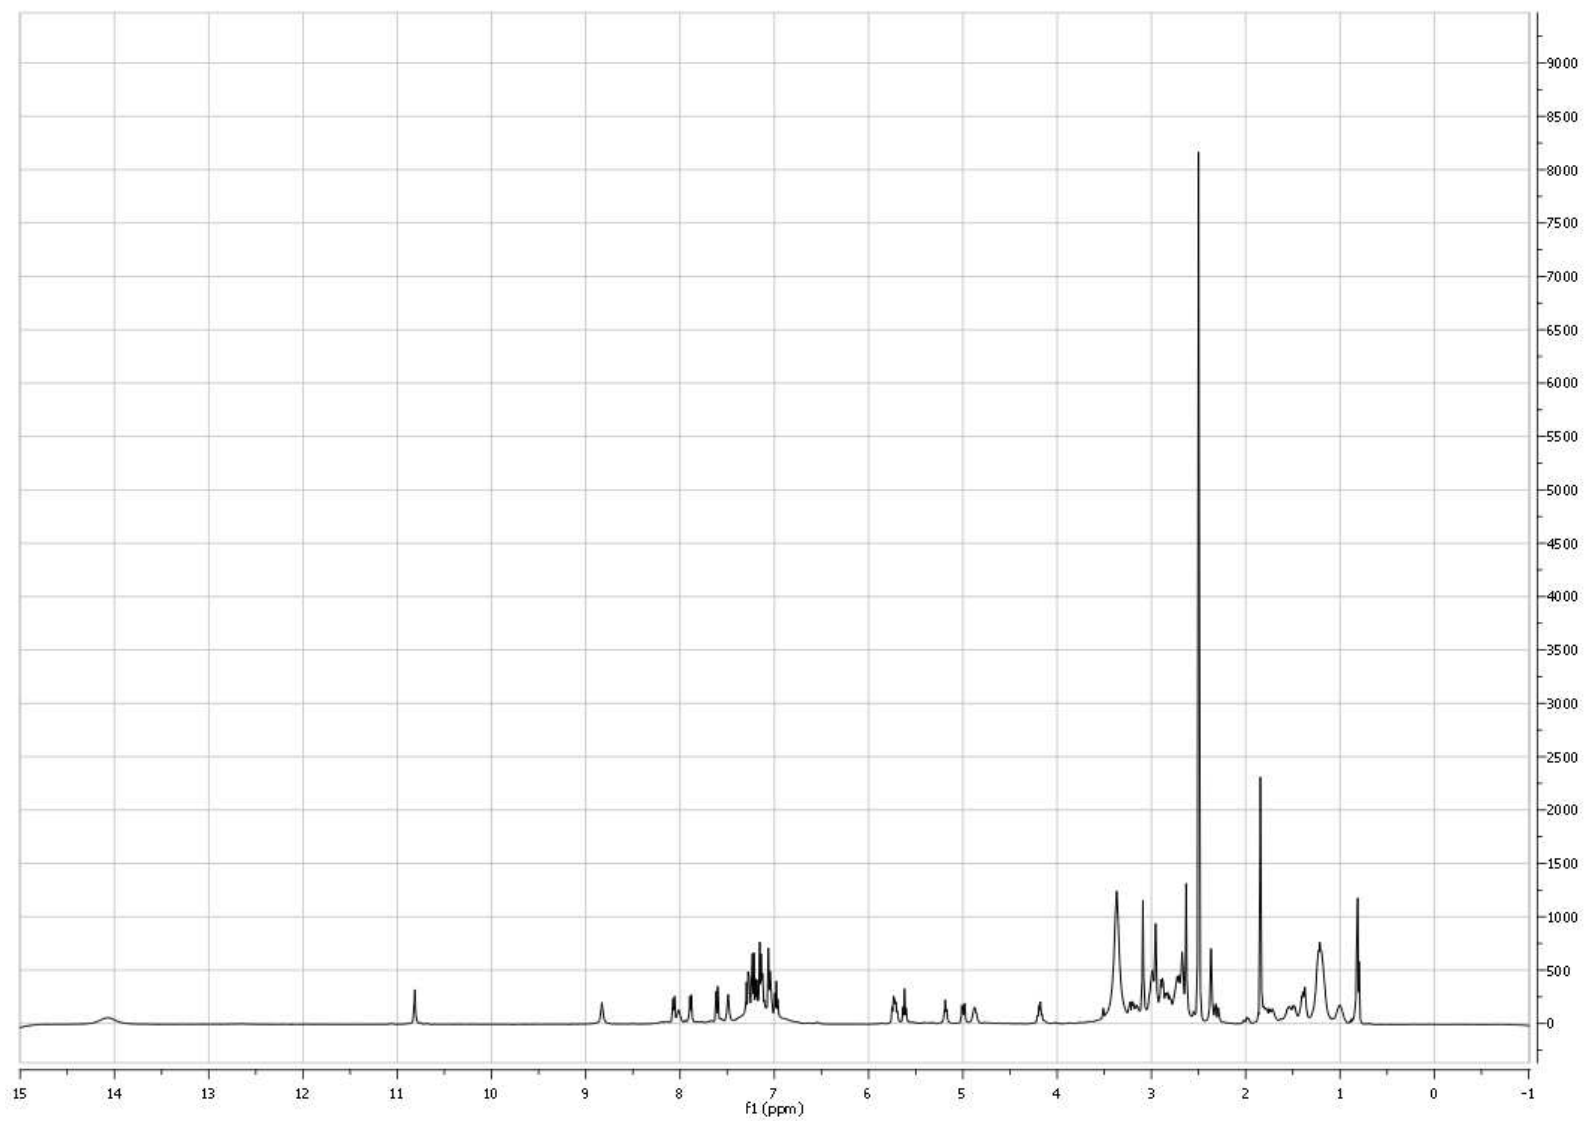

**Figure 32B:**  $^1\text{H-NMR}$  spectrum of compound 32.

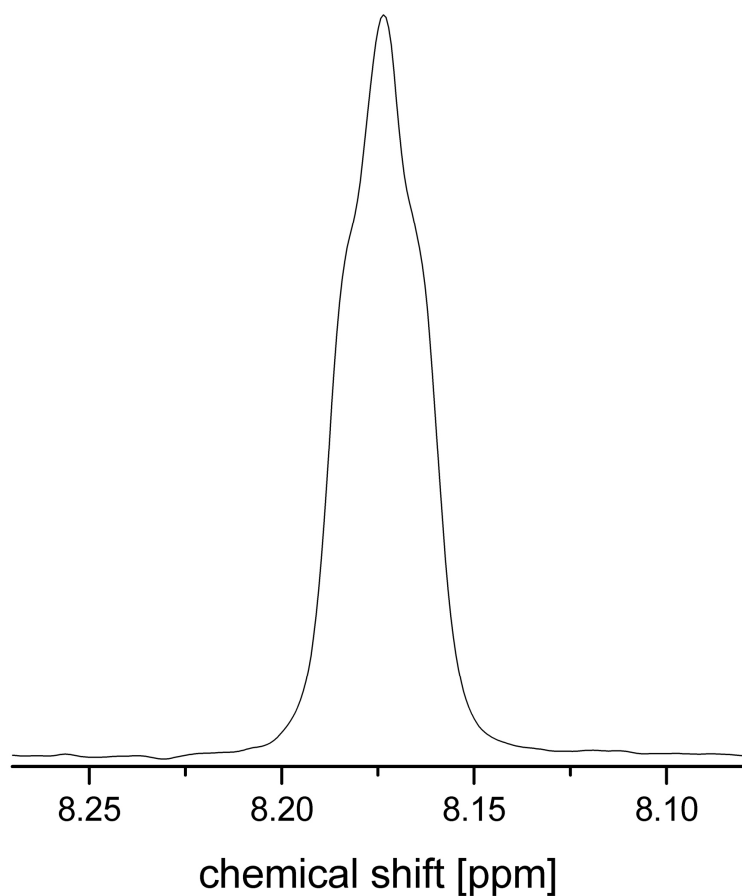

**Figure 33.** f2 slice of the ROESY crosspeak between *N*Me-Lys<sup>10</sup> H<sup>ζ</sup> and Asp<sup>5</sup> H<sup>β</sup><sub>proS</sub> detected with 8192 complex datapoints in f2, processed by multiplication with a squared cosine window function on 16384 datapoints in f2.
